# Supplementary material for: Water-mediated one-pot multi-step synthesis of chiral 1,3-diarylpropan-1-ols by the asymmetric hydrofunctionalisation of simple alkynes
Source: Royal Society of Chemistry journal article supplement (doi:10.1039/d3gc04945k), 2024-01-01
Supplement: d3gc04945k1.pdf [file d3gc04945k1.pdf]

## *Supporting Information*

### **Water-mediated one-pot multi-step synthesis of chiral 1,3- diarylpropan-1-ols by asymmetric hydrofunctionalisation of simple alkynes**

Pinke Yu,<sup>a†</sup> Qixing Liu,<sup>a†</sup> Linhong Zuo,<sup>a</sup> Xumu Zhang,<sup>\*b</sup> Congcong Yin,<sup>\*a</sup> and Haifeng Zhou<sup>\*a</sup>

<sup>a</sup> Hubei Key Laboratory of Natural Products Research and Development, College of Biological and Pharmaceutical Sciences, China Three Gorges University, 443002, Yichang, China

<sup>b</sup> Department of Chemistry, Academy for Advanced Interdisciplinary Studies and Shenzhen Grubbs Institute, Southern University of Science and Technology, Shenzhen 518055, P. R. China

E-mail: [zhangxm@sustech.edu.cn](mailto:zhangxm@sustech.edu.cn); [yincc@ctgu.edu.cn](mailto:yincc@ctgu.edu.cn); [zhouhf@ctgu.edu.cn](mailto:zhouhf@ctgu.edu.cn)

† These authors contributed equally to this work.

|                                                                                      |     |
|--------------------------------------------------------------------------------------|-----|
| 1. General information.....                                                          | S2  |
| 2. General procedure for the synthesis of racemic 1,3-diarylpropan-1-ols .....       | S2  |
| 3. General procedure for the asymmetric hydrofunctionalisation of aryl alkynes. .... | S2  |
| 4. Gram-scale synthesis.....                                                         | S3  |
| 5. Synthetic transformations of chiral secondary alcohol products .....              | S3  |
| 6. Analytical data of chiral alcohols .....                                          | S4  |
| 7. NMR spectra of chiral alcohols .....                                              | S15 |
| 8. HRMS spectra of <b>3g</b> .....                                                   | S49 |
| 9. HPLC spectra of chiral alcohols .....                                             | S50 |

## 1. General information

Unless otherwise noted, all reagents and solvents were purchased from commercial suppliers and used without further purification. Column chromatography was performed on silica gel. NMR spectra were recorded on Bruker AVANCE III (400 MHz) spectrometers. CDCl<sub>3</sub> was used for the NMR analysis with tetramethyl silane as the internal standard. Chemical shifts were reported upfield to TMS (0.00 ppm) for <sup>1</sup>H NMR and relative to CDCl<sub>3</sub> (77.0 ppm) for <sup>13</sup>C NMR. HPLC analyses were performed on a Waters 2489 series instrument with chiral column OD-H, IA-H, AD-H, IC-H and OJ-H. Optical rotations were measured using an MCP-500. HRMS spectra were acquired on an Agilent 6210 ESI/TOF mass spectrometer.

## 2. General procedure for the synthesis of racemic 1,3-diarylpropan-1-ols

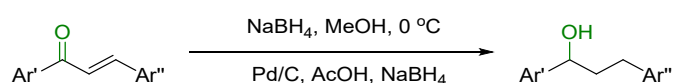

To a solution of chalcone derivative (0.25 mmol) in methanol (2 mL) was added NaBH<sub>4</sub> (38 mg, 1 mmol) at 0 °C. The mixture was stirred at 0 °C until the reaction was completed (monitored by TLC). Then Pd/C (26.5 mg, 0.25 mmol, 10%), AcOH (1 mL) and NaBH<sub>4</sub> (38 mg, 1 mmol) were added and stirred at 0 °C for 5 min. Pd/C was removed by filtration, the solvent was concentrated under reduced pressure. The residue was purified by thin layer chromatography to yield racemic 1,3-diphenylpropan-1-ol.

## 3. General procedure for the asymmetric hydrofunctionalisation of aryl alkynes

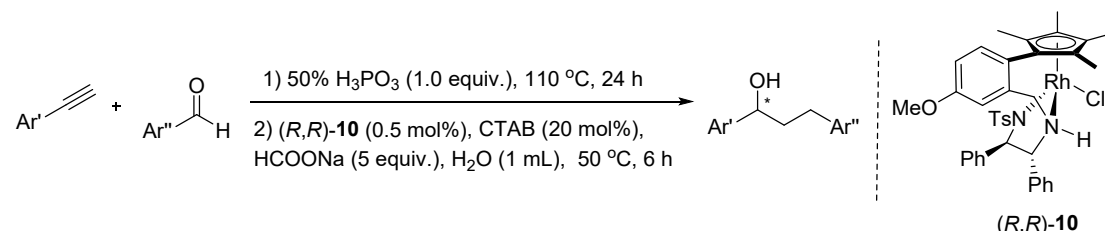

Under nitrogen atmosphere, alkyne (0.5 mmol), aldehyde (0.6 mmol) and 50% H<sub>3</sub>PO<sub>3</sub> (82 mg, 0.5 mmol in H<sub>2</sub>O) were added to a 10 mL Schlenk tube. The reaction mixture was stirred at 110 °C for 24 h. Then (*R,R*)-**10** (1.9 mg, 0.5 mol%), CTAB (36.4 mg, 0.1 mol), HCOONa (170 mg, 2.5 mmol) and H<sub>2</sub>O (1 mL) were added, the reaction mixture was stirred at 50 °C for 12 h. Then water (2 mL) was added and extracted with EtOAc, the combined organic layer was dried over Na<sub>2</sub>SO<sub>4</sub> and concentrated under reduced pressure. The residue was further purified by thin layer chromatography to afford desired product.

#### 4. Gram-scale synthesis

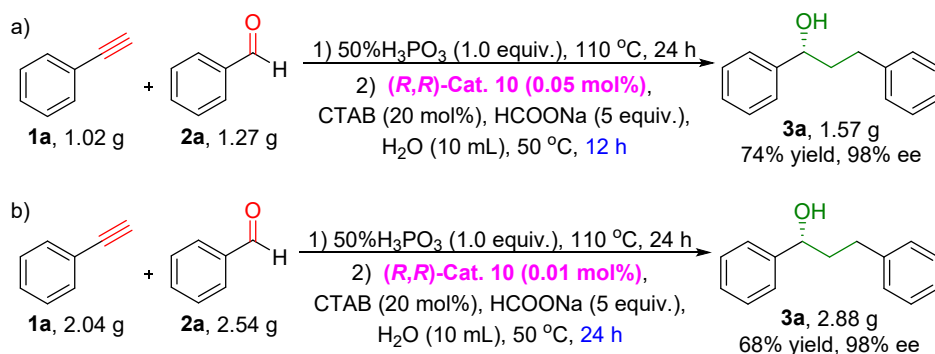

**S/C = 2 000:** Under nitrogen atmosphere, phenylacetylene (**1a**, 1.02 g, 10 mmol), benzaldehyde (**2a**, 1.27 g, 12 mmol) and 50% H<sub>3</sub>PO<sub>3</sub> (1.64 g, 10 mmol in H<sub>2</sub>O) were added to a 50 mL Schlenk tube. The reaction mixture was stirred at 110 °C for 24 h. Then (*R,R*)-**10** (3.8 mg, 0.05 mol%), CTAB (0.73 g, 2 mmol), HCOONa (3.40 g, 50 mmol) and H<sub>2</sub>O (10 mL) were added. the reaction mixture was stirred at 50 °C for 12 h. Then water (10 mL) was added and extracted with EtOAc. the combined organic layer was dried over Na<sub>2</sub>SO<sub>4</sub> and concentrated under reduced pressure. The residue was further purified by silica gel column chromatography to afford chiral 4-phenyl-2-oxazolidanone **3a** with 74% yield and 98% ee.

**S/C = 10 000:** Under nitrogen atmosphere, phenylacetylene (**1a**, 2.04 g, 20 mmol), benzaldehyde (**2a**, 2.54 g, 24 mmol) and 50% H<sub>3</sub>PO<sub>3</sub> (3.28 g, 20 mmol in H<sub>2</sub>O) were added to a 50 mL Schlenk tube. The reaction mixture was stirred at 110 °C for 24 h. Then (*R,R*)-**10** (1.5 mg, 0.01 mol%), CTAB (1.46 g, 4 mmol), HCOONa (6.80 g, 100 mmol) and H<sub>2</sub>O (10 mL) were added, the reaction mixture was stirred at 50 °C for 24 h. Then water (20 mL) was added and extracted with EtOAc. the combined organic layer was dried over Na<sub>2</sub>SO<sub>4</sub> and concentrated under reduced pressure. The residue was further purified by silica gel column chromatography to afford chiral 4-phenyl-2-oxazolidanone **3a** with 68% yield and 98% ee.

#### 5. Synthetic transformations of chiral secondary alcohol products

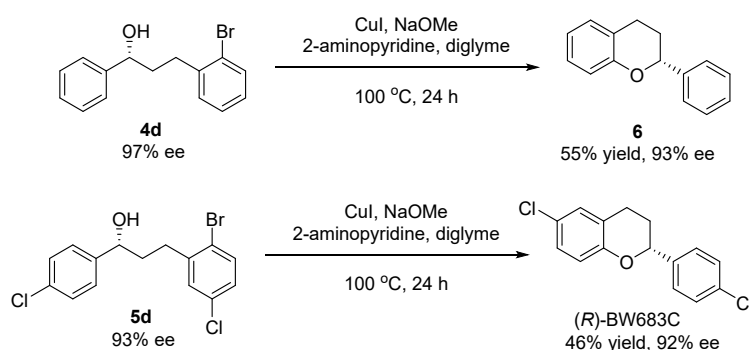

#### Synthesis of chiral chroman **6**<sup>10</sup>

To a solution of **4d** (145 mg, 0.5 mmol, 97% ee) in anhydrous diglyme (2 mL) was added CuI (9.5 mg, 0.05 mmol), NaOMe (40.5 mg, 0.75 mmol) and 2-aminopyridine (9.4 mg, 0.1 mmol). The mixture was stirred at 100 °C for 24 h and then quenched with water, extracted with EtOAc.

The organic phase was dried over Na<sub>2</sub>SO<sub>4</sub>, evaporated under reduced pressure and the residue was purified by silica gel column chromatography to afford chiral chroman **6** as a yellow oil (57.8 mg, 55% yield, 93% ee);  $[\alpha]_D^{25} = +30.4$  ( $c = 1.0$ , CHCl<sub>3</sub>); **<sup>1</sup>H NMR** (400 MHz, CDCl<sub>3</sub>)  $\delta$  7.46 – 7.27 (m, 5H), 7.14 – 7.06 (m, 2H), 6.92 – 6.84 (m, 2H), 5.06 – 5.02 (m, 1H), 3.02 – 2.93 (m, 1H), 2.81 – 2.74 (m, 1H), 2.22 – 2.15 (m, 1H), 2.12 – 2.02 (m, 1H); **<sup>13</sup>C NMR** (100 MHz, CDCl<sub>3</sub>)  $\delta$  155.1, 141.7, 129.5, 128.5, 127.8, 127.3, 126.0, 121.8, 120.3, 116.9, 77.7, 29.9, 25.0; **HPLC** (Chiralcel IA-H column, *n*-hexane, 0.4 mL/min; 220 nm):  $t_R = 27.0$  min (minor), 28.9 min (major).

### Synthesis of (*R*)-BW683C<sup>10</sup>

To a solution of **5d** (89.5 mg, 0.25 mmol, 93% ee) in anhydrous diglyme (1 mL) was added CuI (4.8 mg, 0.025 mmol), NaOMe (20.3 mg, 0.375 mmol) and 2-aminopyridine (4.7 mg, 0.05 mmol). The mixture was stirred at 100 °C for 24 h and then quenched with water, extracted with EtOAc. The organic phase was dried over Na<sub>2</sub>SO<sub>4</sub>, evaporated under reduced pressure and the residue was purified by silica gel column chromatography to afford (*R*)-BW683C as a white solid (32.0 mg, 46% yield, 92% ee);  $[\alpha]_D^{25} = +3.8$  ( $c = 1.0$ , CHCl<sub>3</sub>); **<sup>1</sup>H NMR** (400 MHz, CDCl<sub>3</sub>)  $\delta$  7.37 – 7.31 (m, 4H), 7.11 – 7.01 (m, 2H), 6.83 – 6.75 (m, 1H), 5.01 (dd,  $J = 10.1, 2.5$  Hz, 1H), 2.99 – 2.90 (m, 1H), 2.78 – 2.71 (m, 1H), 2.21 – 2.15 (m, 1H), 2.06 – 1.96 (m, 1H); **<sup>13</sup>C NMR** (100 MHz, CDCl<sub>3</sub>)  $\delta$  153.4, 139.7, 133.7, 129.0, 128.7, 127.4, 127.3, 125.2, 123.2, 118.2, 77.1, 29.4, 24.8; **HPLC** (Chiralcel IA-H column, *n*-hexane : isopropanol = 99 : 1 (v/v); 1.0 mL/min; 220 nm):  $t_R = 6.3$  min (minor), 7.1 min (major).

## 6. Analytical data of chiral alcohols

(*R*)-1,3-diphenylpropan-1-ol<sup>1</sup> (**3a**, known compound)

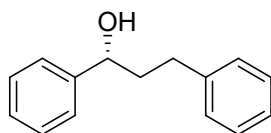

Colorless oil, 85.9 mg, 81% yield, 98% ee;  $[\alpha]_D^{25} = +37.0$  ( $c = 1.0$ , CHCl<sub>3</sub>); **<sup>1</sup>H NMR** (400 MHz, CDCl<sub>3</sub>)  $\delta$  7.35 – 7.16 (m, 10H), 4.67 (dd,  $J = 7.8, 5.4$  Hz, 1H), 2.78 – 2.62 (m, 2H), 2.17 – 1.97 (m, 3H); **<sup>13</sup>C NMR** (100 MHz, CDCl<sub>3</sub>)  $\delta$  144.5, 141.7, 128.5, 128.4, 128.4, 127.6, 125.9, 125.8, 73.8, 40.4, 32.0; **HPLC** (Chiralcel OD-H column, *n*-hexane : isopropanol = 95 : 5 (v/v); 1.0 mL/min; 220 nm):  $t_R = 17.0$  min (minor), 20.1 min (major).

(*R*)-3-phenyl-1-(*o*-tolyl)propan-1-ol<sup>3</sup> (**3b**, known compound)

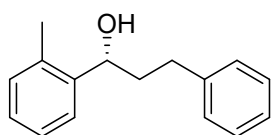

Colorless oil, 81.4 mg, 72% yield, 99% ee;  $[\alpha]_D^{25} = +108.2$  ( $c = 1.0$ , CHCl<sub>3</sub>); **<sup>1</sup>H NMR** (400 MHz,

CDCl<sub>3</sub>)  $\delta$  7.48 (d,  $J$  = 9.2 Hz, 1H), 7.30 – 7.07 (m, 8H), 4.91 (dd,  $J$  = 8.3, 4.4 Hz, 1H), 2.87 – 2.68 (m, 2H), 2.22 (s, 3H), 2.10 – 1.93 (m, 2H), 1.81 (s, 1H); <sup>13</sup>C NMR (100 MHz, CDCl<sub>3</sub>)  $\delta$  142.7, 141.8, 134.4, 130.4, 128.4, 128.4, 127.2, 126.3, 125.8, 125.1, 69.9, 39.4, 32.3, 18.9; HPLC (Chiralcel AD-H column, *n*-hexane : isopropanol = 99 : 1 (v/v); 1.0 mL/min; 220 nm):  $t_R$  = 29.6 min (minor), 32.5 min (major).

(*R*)-1-(2-methoxyphenyl)-3-phenylpropan-1-ol<sup>1</sup> (**3c**, known compound)

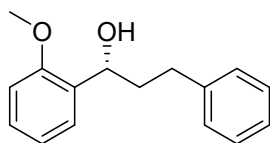

Colorless oil, 66.6 mg, 55% yield, 78% ee;  $[\alpha]_D^{25} = +29.8$  ( $c$  = 1.0, CHCl<sub>3</sub>); <sup>1</sup>H NMR (400 MHz, CDCl<sub>3</sub>)  $\delta$  7.31 – 7.15 (m, 7H), 6.95 (t,  $J$  = 7.5 Hz, 1H), 6.88 (d,  $J$  = 8.2 Hz, 1H), 4.88 (dd,  $J$  = 8.0, 5.1 Hz, 1H), 3.83 (s, 3H), 2.87 – 2.79 (m, 1H), 2.72 – 2.64 (m, 2H), 2.20 – 2.05 (m, 2H); <sup>13</sup>C NMR (100 MHz, CDCl<sub>3</sub>)  $\delta$  156.6, 142.1, 132.2, 128.4, 128.3, 128.3, 127.0, 125.7, 120.7, 110.5, 70.7, 55.2, 38.6, 32.3; HPLC (Chiralcel IB-H column, *n*-hexane : isopropanol = 95 : 5 (v/v); 1.0 mL/min; 220 nm):  $t_R$  = 10.3 min (minor), 12.6 min (major).

(*R*)-1-(2-fluorophenyl)-3-phenylpropan-1-ol<sup>1</sup> (**3d**, known compound)

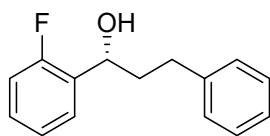

Yellow oil, 74.8 mg, 65% yield, 75% ee;  $[\alpha]_D^{25} = +21.0$  ( $c$  = 1.0, CHCl<sub>3</sub>); <sup>1</sup>H NMR (400 MHz, CDCl<sub>3</sub>)  $\delta$  7.46 (td,  $J$  = 7.5, 1.9 Hz, 1H), 7.28 – 7.12 (m, 7H), 7.04 – 6.99 (m, 1H), 5.02 (dd,  $J$  = 7.7, 5.3 Hz, 1H), 2.81 – 2.65 (m, 2H), 2.13 – 2.03 (m, 3H); <sup>13</sup>C NMR (100 MHz, CDCl<sub>3</sub>)  $\delta$  159.8 (d,  $J$  = 245.4 Hz), 141.6, 131.4 (d,  $J$  = 13.2 Hz), 128.9 (d,  $J$  = 8.3 Hz), 128.4, 128.4, 127.3 (d,  $J$  = 4.5 Hz), 125.9, 124.3 (d,  $J$  = 3.5 Hz), 115.3 (d,  $J$  = 21.9 Hz), 67.9 (d,  $J$  = 2.4 Hz), 39.4, 32.0; HPLC (Chiralcel IA-H column, *n*-hexane : isopropanol = 95 : 5 (v/v); 1.0 mL/min; 220 nm):  $t_R$  = 9.1 min (minor), 10.1 min (major).

(*R*)-1-(3-fluorophenyl)-3-phenylpropan-1-ol<sup>3</sup> (**3e**, known compound)

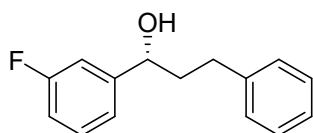

Yellow oil, 64.4 mg, 56% yield, 96% ee;  $[\alpha]_D^{25} = +12.0$  ( $c$  = 1.0, CHCl<sub>3</sub>); <sup>1</sup>H NMR (400 MHz, CDCl<sub>3</sub>)  $\delta$  7.32 – 7.25 (m, 3H), 7.21 – 7.17 (m, 3H), 7.10 – 7.05 (m, 2H), 6.96 (td,  $J$  = 8.4, 2.7 Hz, 1H), 4.68 (dd,  $J$  = 7.9, 5.2 Hz, 1H), 2.78 – 2.63 (m, 2H), 2.12 – 1.96 (m, 3H); <sup>13</sup>C NMR (100 MHz,

CDCl<sub>3</sub>)  $\delta$  162.9 (d,  $J = 246.0$  Hz), 147.3 (d,  $J = 6.6$  Hz), 141.5, 130.0 (d,  $J = 8.1$  Hz), 128.4, 128.4, 125.9, 121.4 (d,  $J = 2.8$  Hz), 114.4 (d,  $J = 21.2$  Hz), 112.8 (d,  $J = 21.7$  Hz), 73.2, 40.4, 31.9; **HPLC** (Chiralcel IA-H column, *n*-hexane : isopropanol = 95 : 5 (v/v); 1.0 mL/min; 220 nm):  $t_R = 10.5$  min (minor), 12.4 min (major).

**(R)-3-phenyl-1-(*p*-tolyl)propan-1-ol<sup>1</sup> (3f, known compound)**

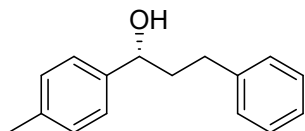

Colorless oil, 90.4 mg, 80% yield, 98% ee;  $[\alpha]_D^{25} = +36.8$  ( $c = 1.0$ , CHCl<sub>3</sub>); **<sup>1</sup>H NMR** (400 MHz, CDCl<sub>3</sub>)  $\delta$  7.28 – 7.13 (m, 9H), 4.61 (dd,  $J = 7.7, 5.5$  Hz, 1H), 2.75 – 2.59 (m, 2H), 2.33 (s, 3H), 2.15 – 1.95 (m, 3H); **<sup>13</sup>C NMR** (100 MHz, CDCl<sub>3</sub>)  $\delta$  141.8, 141.5, 137.3, 129.1, 128.4, 128.3, 125.9, 125.8, 73.7, 40.3, 32.0, 21.1; **HPLC** (Chiralcel OD-H column, *n*-hexane : isopropanol = 95 : 5 (v/v); 1.0 mL/min; 220 nm):  $t_R = 15.0$  min (minor), 18.2 min (major).

**(R)-1-(4-ethylphenyl)-3-phenylpropan-1-ol (3g, unknown compound)**

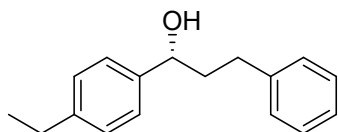

Yellow oil, 90.1 mg, 75% yield, 99% ee;  $[\alpha]_D^{25} = +28.2$  ( $c = 1.0$ , CHCl<sub>3</sub>); **<sup>1</sup>H NMR** (400 MHz, CDCl<sub>3</sub>)  $\delta$  7.29 – 7.15 (m, 9H), 4.64 (dd,  $J = 7.8, 5.5$  Hz, 1H), 2.77 – 2.61 (m, 4H), 2.15 – 1.95 (m, 3H), 1.23 (t,  $J = 7.6$  Hz, 3H); **<sup>13</sup>C NMR** (100 MHz, CDCl<sub>3</sub>)  $\delta$  143.7, 141.8, 141.8, 128.4, 128.3, 128.0, 125.9, 125.8, 73.7, 40.3, 32.1, 28.5, 15.6; **HRMS** (ESI) Calculated for C<sub>15</sub>H<sub>20</sub>NO<sub>2</sub> [M+Na]<sup>+</sup> 263.1406; found 263.1405; **HPLC** (Chiralcel OJ-H column, *n*-hexane : isopropanol = 95 : 5 (v/v); 1.0 mL/min; 220 nm):  $t_R = 12.0$  min (major), 16.2 min (minor).

**(R)-1-(4-isopropylphenyl)-3-phenylpropan-1-ol<sup>3</sup> (3h, known compound)**

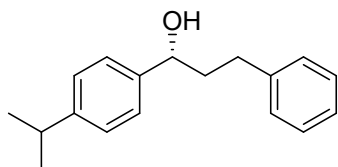

Yellow oil, 101.7 mg, 80% yield, 99% ee;  $[\alpha]_D^{25} = +40.0$  ( $c = 1.0$ , CHCl<sub>3</sub>); **<sup>1</sup>H NMR** (400 MHz, CDCl<sub>3</sub>)  $\delta$  7.29 – 7.15 (m, 9H), 4.64 (dd,  $J = 7.9, 5.4$  Hz, 1H), 2.93 – 2.84 (m, 1H), 2.78 – 2.61 (m, 2H), 2.15 – 1.94 (m, 3H), 1.24 (d,  $J = 6.9$  Hz, 6H); **<sup>13</sup>C NMR** (100 MHz, CDCl<sub>3</sub>)  $\delta$  148.3, 141.9, 141.8, 128.4, 128.3, 126.5, 125.9, 125.7, 73.7, 40.3, 33.8, 32.1, 24.0; **HPLC** (Chiralcel IB-H column, *n*-hexane : isopropanol = 95 : 5 (v/v); 1.0 mL/min; 220 nm):  $t_R = 8.3$  min (minor), 9.7 min (major).

(*R*)-1-(4-(tert-butyl)phenyl)-3-phenylpropan-1-ol<sup>1</sup> (**3i**, known compound)

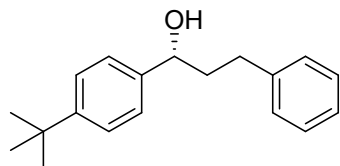

Yellow oil, 111.3 mg, 83% yield, >99% ee;  $[\alpha]_D^{25} = +27.6$  ( $c = 1.0$ ,  $\text{CHCl}_3$ );  $^1\text{H NMR}$  (400 MHz,  $\text{CDCl}_3$ )  $\delta$  7.38 – 7.15 (m, 9H), 4.64 (dd,  $J = 7.9, 5.4$  Hz, 1H), 2.79 – 2.62 (m, 2H), 2.17 – 1.99 (m, 2H), 1.95 (s, 1H), 1.31 (s, 9H);  $^{13}\text{C NMR}$  (100 MHz,  $\text{CDCl}_3$ )  $\delta$  150.6, 141.8, 141.5, 128.4, 128.3, 125.8, 125.6, 125.4, 73.6, 40.2, 34.5, 32.1, 31.3; **HPLC** (Chiralcel OJ-H column, *n*-hexane : isopropanol = 95 : 5 (v/v); 1.0 mL/min; 220 nm):  $t_R = 10.2$  min (major), 15.6 min (minor).

(*R*)-1-(4-methoxyphenyl)-3-phenylpropan-1-ol<sup>1</sup> (**3j**, known compound)

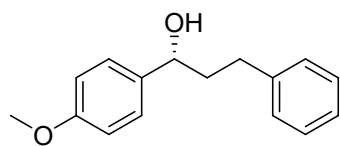

Colorless oil, 89.6 mg, 74% yield, 98% ee;  $[\alpha]_D^{25} = +29.6$  ( $c = 1.0$ ,  $\text{CHCl}_3$ );  $^1\text{H NMR}$  (400 MHz,  $\text{CDCl}_3$ )  $\delta$  7.29 – 7.16 (m, 7H), 6.90 – 6.86 (m, 2H), 4.62 (dd,  $J = 7.7, 5.7$  Hz, 1H), 3.80 (s, 3H), 2.75 – 2.59 (m, 2H), 2.16 – 1.96 (m, 2H), 1.91 (s, 1H);  $^{13}\text{C NMR}$  (100 MHz,  $\text{CDCl}_3$ )  $\delta$  159.0, 141.8, 136.6, 128.4, 128.3, 127.2, 125.8, 113.8, 73.4, 55.3, 40.3, 32.1; **HPLC** (Chiralcel AD-H column, *n*-hexane : isopropanol = 95 : 5 (v/v); 1.0 mL/min; 220 nm):  $t_R = 19.6$  min (major), 22.0 min (minor).

(*R*)-1-(4-fluorophenyl)-3-phenylpropan-1-ol<sup>1</sup> (**3k**, known compound)

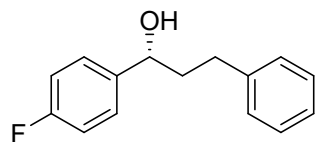

Yellow oil, 78.2 mg, 68% yield, 92% ee;  $[\alpha]_D^{25} = +16.6$  ( $c = 1.0$ ,  $\text{CHCl}_3$ );  $^1\text{H NMR}$  (400 MHz,  $\text{CDCl}_3$ )  $\delta$  7.31 – 6.99 (m, 9H), 4.65 (dd,  $J = 7.8, 5.4$  Hz, 1H), 2.75 – 2.60 (m, 2H), 2.13 – 1.95 (m, 3H);  $^{13}\text{C NMR}$  (100 MHz,  $\text{CDCl}_3$ )  $\delta$  162.1 (d,  $J = 245.4$  Hz), 141.5, 140.2 (d,  $J = 3.2$  Hz), 128.4, 128.4, 127.5 (d,  $J = 8.0$  Hz), 125.9, 115.3 (d,  $J = 21.3$  Hz), 73.1, 40.5, 31.9; **HPLC** (Chiralcel IA-H column, *n*-hexane : isopropanol = 95 : 5 (v/v); 1.0 mL/min; 220 nm):  $t_R = 10.6$  min (minor), 12.0 min (major).

(*R*)-1-(4-chlorophenyl)-3-phenylpropan-1-ol<sup>1</sup> (**3l**, known compound)

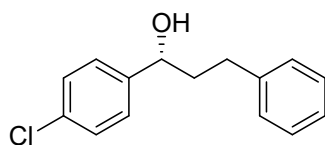

Colorless oil, 96.0 mg, 78% yield, 95% ee;  $[\alpha]_D^{25} = +17.0$  ( $c = 1.0$ ,  $\text{CHCl}_3$ );  $^1\text{H NMR}$  (400 MHz,  $\text{CDCl}_3$ )  $\delta$  7.33 – 7.16 (m, 9H), 4.64 (dd,  $J = 7.8, 5.3$  Hz, 1H), 2.75 – 2.60 (m, 2H), 2.15 – 1.95 (m, 3H);  $^{13}\text{C NMR}$  (100 MHz,  $\text{CDCl}_3$ )  $\delta$  143.0, 141.4, 133.2, 128.6, 128.4, 128.4, 127.3, 125.9, 73.1, 40.4, 31.9; **HPLC** (Chiralcel OD-H column, *n*-hexane : isopropanol = 95 : 5 (v/v); 1.0 mL/min; 220 nm):  $t_R = 17.9$  min (minor), 22.1 min (major).

(*R*)-1-(4-bromophenyl)-3-phenylpropan-1-ol<sup>1</sup> (**3m**, known compound)

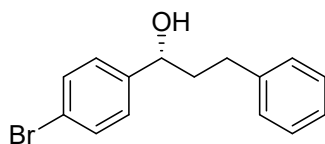

Colorless oil, 114.6 mg, 79% yield, 95% ee;  $[\alpha]_D^{25} = +15.2$  ( $c = 1.0$ ,  $\text{CHCl}_3$ );  $^1\text{H NMR}$  (400 MHz,  $\text{CDCl}_3$ )  $\delta$  7.47 – 7.43 (m, 2H), 7.29 – 7.15 (m, 7H), 4.62 (dd,  $J = 7.9, 5.3$  Hz, 1H), 2.73 – 2.60 (m, 2H), 2.12 – 1.93 (m, 3H);  $^{13}\text{C NMR}$  (100 MHz,  $\text{CDCl}_3$ )  $\delta$  143.5, 141.4, 131.5, 128.4, 128.4, 127.6, 125.9, 121.3, 73.1, 40.4, 31.8; **HPLC** (Chiralcel OD-H column, *n*-hexane : isopropanol = 95 : 5 (v/v); 1.0 mL/min; 220 nm):  $t_R = 19.3$  min (minor), 23.8 min (major).

(*R*)-3-phenyl-1-(4-(trifluoromethyl)phenyl)propan-1-ol<sup>1</sup> (**3n**, known compound)

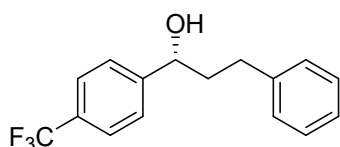

Yellow oil, 50.4 mg, 36% yield, 95% ee;  $[\alpha]_D^{25} = +10.4$  ( $c = 1.0$ ,  $\text{CHCl}_3$ );  $^1\text{H NMR}$  (400 MHz,  $\text{CDCl}_3$ )  $\delta$  7.60 (d,  $J = 8.1$  Hz, 2H), 7.45 (d,  $J = 8.0$  Hz, 2H), 7.30 – 7.18 (m, 5H), 4.75 (dd,  $J = 8.0, 5.1$  Hz, 1H), 2.79 – 2.65 (m, 2H), 2.15 – 1.97 (m, 3H);  $^{13}\text{C NMR}$  (100 MHz,  $\text{CDCl}_3$ )  $\delta$  148.5, 141.3, 129.7 (q,  $J = 32.3$  Hz), 128.5, 128.4, 126.1, 126.0, 125.4 (q,  $J = 3.8$  Hz), 124.3 (q,  $J = 272.0$  Hz), 73.1, 40.5, 31.8; **HPLC** (Chiralcel IB-H column, *n*-hexane : isopropanol = 95 : 5 (v/v); 1.0 mL/min; 220 nm):  $t_R = 10.6$  min (minor), 11.9 min (major).

(*R*)-3-phenyl-1-(thiophen-2-yl)propan-1-ol<sup>1</sup> (**3o**, known compound)

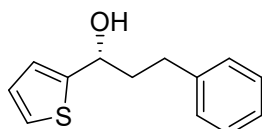



Colorless oil, 89.4 mg, 82% yield, 99% ee;  $[\alpha]_D^{25} = +18.0$  ( $c = 1.0$ ,  $\text{CHCl}_3$ );  $^1\text{H NMR}$  (400 MHz,  $\text{CDCl}_3$ )  $\delta$  7.30 – 7.17 (m, 6H), 6.97 – 6.95 (m, 2H), 4.91 (dd,  $J = 7.6, 5.7$  Hz, 1H), 2.79 – 2.66 (m, 2H), 2.24 – 2.08 (m, 3H);  $^{13}\text{C NMR}$  (100 MHz,  $\text{CDCl}_3$ )  $\delta$  148.5, 141.4, 128.5, 128.4, 126.6, 125.9, 124.6, 123.9, 69.5, 40.7, 32.0; **HPLC** (Chiralcel OD-H column,  $n$ -hexane : isopropanol = 95 : 5 (v/v); 1.0 mL/min; 220 nm):  $t_R = 17.7$  min (minor), 24.5 min (major).

(*R*)-1-phenyl-3-(*o*-tolyl)propan-1-ol<sup>3</sup> (**4a**, known compound)

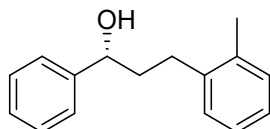

Colorless oil, 82.5 mg, 73% yield, 98% ee;  $[\alpha]_D^{25} = +42.0$  ( $c = 1.0$ ,  $\text{CHCl}_3$ );  $^1\text{H NMR}$  (400 MHz,  $\text{CDCl}_3$ )  $\delta$  7.37 – 7.25 (m, 5H), 7.14 – 7.06 (m, 4H), 4.71 (dd,  $J = 7.8, 5.3$  Hz, 1H), 2.78 – 2.57 (m, 2H), 2.25 (s, 3H), 2.11 – 1.92 (m, 3H);  $^{13}\text{C NMR}$  (100 MHz,  $\text{CDCl}_3$ )  $\delta$  144.5, 140.0, 135.9, 130.2, 128.7, 128.5, 127.6, 126.0, 125.9, 125.9, 74.2, 39.2, 29.4, 19.2; **HPLC** (Chiralcel OD-H column,  $n$ -hexane : isopropanol = 95 : 5 (v/v); 1.0 mL/min; 220 nm):  $t_R = 17.2$  min (minor), 19.3 min (major).

(*R*)-3-(2-fluorophenyl)-1-phenylpropan-1-ol<sup>2</sup> (**4b**, known compound)

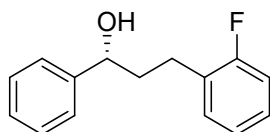

Yellow oil, 79.4 mg, 69% yield, 97% ee;  $[\alpha]_D^{25} = +36.8$  ( $c = 1.0$ ,  $\text{CHCl}_3$ );  $^1\text{H NMR}$  (400 MHz,  $\text{CDCl}_3$ )  $\delta$  7.37 – 7.24 (m, 5H), 7.20 – 7.13 (m, 2H), 7.04 – 6.95 (m, 2H), 4.68 (dd,  $J = 8.0, 5.2$  Hz, 1H), 2.83 – 2.65 (m, 2H), 2.14 – 1.97 (m, 3H);  $^{13}\text{C NMR}$  (100 MHz,  $\text{CDCl}_3$ )  $\delta$  161.1 (d,  $J = 244.7$  Hz), 144.4, 130.6 (d,  $J = 5.1$  Hz), 128.6, 128.5, 127.6, 127.6, 127.5, 125.9, 115.2 (d,  $J = 22.3$  Hz), 73.8, 39.1, 25.5 (d,  $J = 2.4$  Hz); **HPLC** (Chiralcel OD-H column,  $n$ -hexane : isopropanol = 95 : 5 (v/v); 1.0 mL/min; 220 nm):  $t_R = 12.5$  min (minor), 13.1 min (major).

(*R*)-3-(2-chlorophenyl)-1-phenylpropan-1-ol<sup>6</sup> (**4c**, known compound)

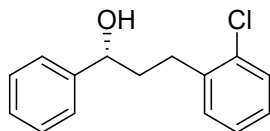

Colorless oil, 91.0 mg, 74% yield, 95% ee;  $[\alpha]_D^{25} = +40.6$  ( $c = 1.0$ ,  $\text{CHCl}_3$ );  $^1\text{H NMR}$  (400 MHz,  $\text{CDCl}_3$ )  $\delta$  7.37 – 7.12 (m, 9H), 4.71 (dd,  $J = 7.8, 5.3$  Hz, 1H), 2.93 – 2.85 (m, 1H), 2.80 – 2.73 (m, 1H), 2.14 – 1.99 (m, 3H);  $^{13}\text{C NMR}$  (100 MHz,  $\text{CDCl}_3$ )  $\delta$  144.3, 139.4, 133.9, 130.4, 129.5, 128.5, 127.6, 127.4, 126.8, 125.9, 73.9, 38.7, 30.0; **HPLC** (Chiralcel OD-H column,  $n$ -hexane : isopropanol = 95 : 5 (v/v); 1.0 mL/min; 220 nm):  $t_R = 14.8$  min (minor), 17.8 min (major).

(*R*)-3-(2-bromophenyl)-1-phenylpropan-1-ol<sup>5</sup> (**4d**, known compound)

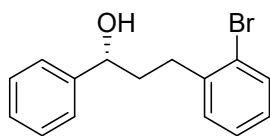

Colorless oil, 120.4 mg, 83% yield, 97% ee;  $[\alpha]_D^{25} = +38.4$  ( $c = 1.0$ ,  $\text{CHCl}_3$ ); **<sup>1</sup>H NMR** (400 MHz,  $\text{CDCl}_3$ )  $\delta$  7.54 – 7.49 (m, 1H), 7.37 – 7.18 (m, 7H), 7.07 – 7.01 (m, 1H), 4.71 (dd,  $J = 7.7, 5.4$  Hz, 1H), 2.92 – 2.72 (m, 2H), 2.12 – 1.98 (m, 3H); **<sup>13</sup>C NMR** (100 MHz,  $\text{CDCl}_3$ )  $\delta$  144.3, 141.1, 132.8, 130.4, 128.5, 127.6, 127.6, 127.4, 125.9, 124.4, 73.9, 38.8, 32.5; **HPLC** (Chiralcel OJ-H column, *n*-hexane : isopropanol = 95 : 5 (v/v); 1.0 mL/min; 220 nm):  $t_R = 15.3$  min (major), 16.9 min (minor).

(*R*)-1-phenyl-3-(*m*-tolyl)propan-1-ol<sup>3</sup> (**4e**, known compound)

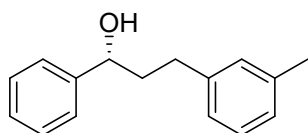

Colorless oil, 90.5 mg, 80% yield, 98% ee;  $[\alpha]_D^{25} = +37.8$  ( $c = 1.0$ ,  $\text{CHCl}_3$ ); **<sup>1</sup>H NMR** (400 MHz,  $\text{CDCl}_3$ )  $\delta$  7.35 – 7.23 (m, 5H), 7.18 – 7.13 (m, 1H), 7.00 – 6.97 (m, 3H), 4.67 (dd,  $J = 7.8, 5.3$  Hz, 1H), 2.74 – 2.58 (m, 2H), 2.31 (s, 3H), 2.17 – 1.96 (m, 3H); **<sup>13</sup>C NMR** (100 MHz,  $\text{CDCl}_3$ )  $\delta$  144.6, 141.7, 137.9, 129.2, 128.5, 128.3, 127.6, 126.6, 125.9, 125.4, 73.9, 40.5, 31.9, 21.4; **HPLC** (Chiralcel OD-H column, *n*-hexane : isopropanol = 95 : 5 (v/v); 1.0 mL/min; 220 nm):  $t_R = 13.5$  min (minor), 16.7 min (major).

(*R*)-3-(3-methoxyphenyl)-1-phenylpropan-1-ol<sup>2</sup> (**4f**, known compound)

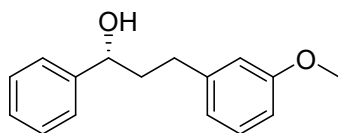

Yellow oil, 61.7 mg, 51% yield, 98% ee;  $[\alpha]_D^{25} = +31.4$  ( $c = 1.0$ ,  $\text{CHCl}_3$ ); **<sup>1</sup>H NMR** (400 MHz,  $\text{CDCl}_3$ )  $\delta$  7.34 – 7.17 (m, 6H), 6.79 – 6.71 (m, 3H), 4.67 (dd,  $J = 7.9, 5.3$  Hz, 1H), 3.77 (s, 3H), 2.75 – 2.59 (m, 2H), 2.16 – 1.96 (m, 3H); **<sup>13</sup>C NMR** (100 MHz,  $\text{CDCl}_3$ )  $\delta$  159.6, 144.5, 143.4, 129.3, 128.5, 127.6, 125.9, 120.8, 114.1, 111.1, 73.8, 55.1, 40.3, 32.1; **HPLC** (Chiralcel OD-H column, *n*-hexane : isopropanol = 95 : 5 (v/v); 1.0 mL/min; 220 nm):  $t_R = 26.6$  min (minor), 34.2 min (major).

(*R*)-1-phenyl-3-(*p*-tolyl)propan-1-ol<sup>3</sup> (**4g**, known compound)

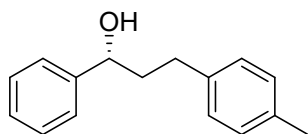

Colorless oil, 75.8 mg, 67% yield, 98% ee;  $[\alpha]_D^{25} = +18.6$  ( $c = 1.0$ ,  $\text{CHCl}_3$ );  $^1\text{H NMR}$  (400 MHz,  $\text{CDCl}_3$ )  $\delta$  7.37 – 7.25 (m, 1H), 7.08 (s, 4H), 4.67 (dd,  $J = 7.8, 5.4$  Hz, 1H), 2.73 – 2.58 (m, 2H), 2.31 (s, 3H), 2.19 – 1.93 (m, 3H);  $^{13}\text{C NMR}$  (100 MHz,  $\text{CDCl}_3$ )  $\delta$  144.6, 138.6, 135.3, 129.0, 128.5, 128.3, 127.6, 125.9, 73.9, 40.5, 31.6, 21.0; **HPLC** (Chiralcel OD-H column, *n*-hexane : isopropanol = 95 : 5 (v/v); 1.0 mL/min; 220 nm):  $t_R = 12.7$  min (major), 15.4 min (minor).

**(R)-3-(4-(tert-butyl)phenyl)-1-phenylpropan-1-ol<sup>8</sup> (4h, known compound)**

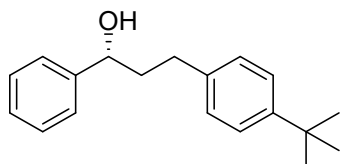

Colorless oil, 93.9 mg, 70% yield, 96% ee;  $[\alpha]_D^{25} = +25.8$  ( $c = 1.0$ ,  $\text{CHCl}_3$ );  $^1\text{H NMR}$  (400 MHz,  $\text{CDCl}_3$ )  $\delta$  7.36 – 7.24 (m, 7H), 7.14 – 7.09 (m, 2H), 4.68 (dd,  $J = 7.8, 5.4$  Hz, 1H), 2.75 – 2.58 (m, 2H), 2.16 – 1.96 (m, 3H), 1.30 (s, 9H);  $^{13}\text{C NMR}$  (100 MHz,  $\text{CDCl}_3$ )  $\delta$  148.6, 144.6, 138.6, 128.5, 128.0, 127.6, 125.9, 125.2, 73.9, 40.4, 34.3, 31.5, 31.4; **HPLC** (Chiralcel IB-H column, *n*-hexane : isopropanol = 98 : 2 (v/v); 1.0 mL/min; 220 nm):  $t_R = 12.1$  min (major), 12.9 min (minor).

**(R)-3-(4-chlorophenyl)-1-phenylpropan-1-ol<sup>3</sup> (4i, known compound)**

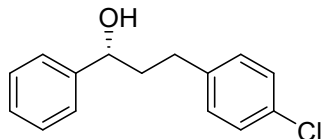

Colorless oil, 99.7 mg, 81% yield, 98% ee;  $[\alpha]_D^{25} = +19.2$  ( $c = 1.0$ ,  $\text{CHCl}_3$ );  $^1\text{H NMR}$  (400 MHz,  $\text{CDCl}_3$ )  $\delta$  7.36 – 7.25 (m, 7H), 7.13 – 7.08 (m, 2H), 4.65 (dd,  $J = 7.9, 5.3$  Hz, 1H), 2.75 – 2.59 (m, 2H), 2.14 – 1.93 (m, 3H);  $^{13}\text{C NMR}$  (100 MHz,  $\text{CDCl}_3$ )  $\delta$  144.4, 140.2, 131.5, 129.8, 128.6, 128.4, 127.7, 125.9, 73.7, 40.3, 31.3; **HPLC** (Chiralcel OD-H column, *n*-hexane : isopropanol = 95 : 5 (v/v); 1.0 mL/min; 220 nm):  $t_R = 12.9$  min (major), 14.5 min (minor).

**(R)-3-(4-bromophenyl)-1-phenylpropan-1-ol<sup>3</sup> (4j, known compound)**

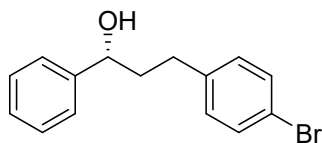

Colorless oil, 116.0 mg, 80% yield, 99% ee;  $[\alpha]_D^{25} = +17.2$  ( $c = 1.0$ ,  $\text{CHCl}_3$ );  $^1\text{H NMR}$  (400 MHz,  $\text{CDCl}_3$ )  $\delta$  7.40 – 7.26 (m, 7H), 7.07 – 7.03 (m, 2H), 4.65 (dd,  $J = 7.9, 5.3$  Hz, 1H), 2.73 – 2.57 (m, 2H), 2.13 – 1.93 (m, 3H);  $^{13}\text{C NMR}$  (100 MHz,  $\text{CDCl}_3$ )  $\delta$  144.3, 140.7, 131.4, 130.2, 128.5, 127.7, 125.8, 119.5, 73.6, 40.2, 31.4; **HPLC** (Chiralcel OJ-H column, *n*-hexane : isopropanol = 95 : 5 (v/v); flow

rate = 1.0 mL/min; 220 nm):  $t_R$  = 19.2 min (major), 21.6 min (minor).

**(*R*)-1-phenyl-3-(4-(trifluoromethyl)phenyl)propan-1-ol<sup>2</sup> (4k, known compound)**

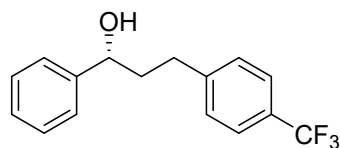

Colorless oil, 82.6 mg, 59% yield, 96% ee;  $[\alpha]_D^{25} = +23.8$  ( $c = 1.0$ ,  $\text{CHCl}_3$ ); **<sup>1</sup>H NMR** (400 MHz,  $\text{CDCl}_3$ )  $\delta$  7.52 (d,  $J = 8.0$  Hz, 2H), 7.36 – 7.25 (m, 7H), 4.67 (dd,  $J = 7.9, 5.3$  Hz, 1H), 2.84 – 2.68 (m, 2H), 2.17 – 1.97 (m, 3H); **<sup>13</sup>C NMR** (100 MHz,  $\text{CDCl}_3$ )  $\delta$  145.9, 144.3, 128.7, 128.6, 128.1, 127.8, 125.8, 125.3 (q,  $J = 4.0$  Hz), 124.3 (q,  $J = 270$  Hz), 73.7, 40.0, 31.8; **HPLC** (Chiralcel FLM-H column, *n*-hexane : isopropanol = 98 : 2 (v/v); 1.0 mL/min; 220 nm):  $t_R$  = 19.1 min (major), 22.8 min (minor).

**(*R*)-3-(naphthalen-2-yl)-1-phenylpropan-1-ol<sup>3</sup> (4l, known compound)**

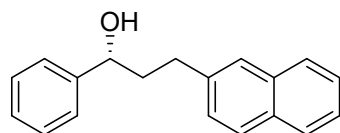

Yellow oil, 85.2 mg, 65% yield, 96% ee;  $[\alpha]_D^{25} = +3.6$  ( $c = 1.0$ ,  $\text{CHCl}_3$ ); **<sup>1</sup>H NMR** (400 MHz,  $\text{CDCl}_3$ )  $\delta$  7.76 (dd,  $J = 14.6, 7.9$  Hz, 3H), 7.61 (s, 1H), 7.45 – 7.38 (m, 2H), 7.34 – 7.23 (m, 6H), 4.68 (dd,  $J = 7.9, 5.3$  Hz, 1H), 2.92 – 2.77 (m, 2H), 2.24 – 2.02 (m, 3H); **<sup>13</sup>C NMR** (100 MHz,  $\text{CDCl}_3$ )  $\delta$  144.5, 139.2, 133.6, 132.0, 128.5, 127.9, 127.6, 127.6, 127.4, 127.3, 126.4, 125.9, 125.9, 125.1, 73.8, 40.3, 32.1; **HPLC** (Chiralcel OJ-H column, *n*-hexane : isopropanol = 85 : 15 (v/v); 1.0 mL/min; 220 nm):  $t_R$  = 18.5 min (major), 22.5 min (minor).

**(*R*)-3-(naphthalen-1-yl)-1-phenylpropan-1-ol<sup>9</sup> (4m, known compound)**

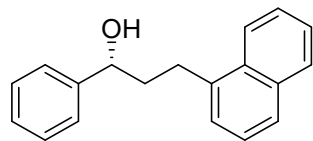

Yellow oil, 89.1 mg, 68% yield, 96% ee;  $[\alpha]_D^{25} = +48.0$  ( $c = 1.0$ ,  $\text{CHCl}_3$ ); **<sup>1</sup>H NMR** (400 MHz,  $\text{CDCl}_3$ )  $\delta$  7.97 – 7.91 (m, 1H), 7.84 – 7.80 (m, 1H), 7.69 (d,  $J = 6.8$  Hz, 1H), 7.48 – 7.41 (m, 2H), 7.36 – 7.24 (m, 7H), 4.74 (dd,  $J = 7.8, 5.2$  Hz, 1H), 3.25 – 3.18 (m, 1H), 3.11 – 3.03 (m, 1H), 2.26 – 2.08 (m, 3H); **<sup>13</sup>C NMR** (100 MHz,  $\text{CDCl}_3$ )  $\delta$  144.5, 138.0, 133.9, 131.8, 128.7, 128.5, 127.6, 126.6, 125.9, 125.9, 125.8, 125.5, 125.4, 123.7, 74.1, 39.8, 29.1; **HPLC** (Chiralcel OD-H column, *n*-hexane : isopropanol = 95 : 5 (v/v); 1.0 mL/min; 220 nm):  $t_R$  = 32.2 min (minor), 36.9 min (major).

**(*R*)-1,3-di-*p*-tolylpropan-1-ol<sup>4</sup> (5a, known compound)**

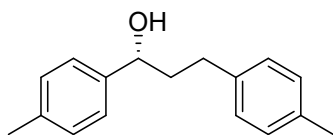

Colorless oil, 90.1 mg, 75% yield, 97% ee;  $[\alpha]_D^{25} = +15.2$  ( $c = 1.0$ ,  $\text{CHCl}_3$ );  $^1\text{H NMR}$  (400 MHz,  $\text{CDCl}_3$ )  $\delta$  7.24 – 7.21 (m, 2H), 7.14 (d,  $J = 8.4$  Hz, 2H), 7.07 (s, 4H), 4.62 (dd,  $J = 7.7, 5.5$  Hz, 1H), 2.70 – 2.56 (m, 2H), 2.33 (s, 3H), 2.30 (s, 3H), 2.12 – 1.93 (m, 3H);  $^{13}\text{C NMR}$  (100 MHz,  $\text{CDCl}_3$ )  $\delta$  141.6, 138.7, 137.2, 135.2, 129.1, 129.0, 128.3, 125.9, 73.7, 40.4, 31.6, 21.1, 21.0; **HPLC** (Chiralcel OD-H column,  $n$ -hexane : isopropanol = 95 : 5 (v/v); 1.0 mL/min; 220 nm):  $t_R = 12.1$  min (major), 13.7 min (minor).

(*R*)-3-(4-fluorophenyl)-1-(*p*-tolyl)propan-1-ol<sup>1</sup> (**5b**, known compound)

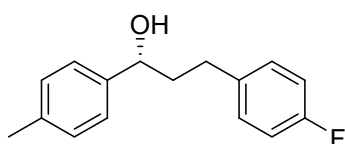

Yellow oil, 90.3 mg, 74% yield, 98% ee;  $[\alpha]_D^{25} = +27.4$  ( $c = 1.0$ ,  $\text{CHCl}_3$ );  $^1\text{H NMR}$  (400 MHz,  $\text{CDCl}_3$ )  $\delta$  7.22 – 7.08 (m, 6H), 6.97 – 6.91 (m, 2H), 4.59 (dd,  $J = 7.8, 5.5$  Hz, 1H), 2.72 – 2.56 (m, 2H), 2.33 (s, 3H), 2.12 – 1.90 (m, 3H);  $^{13}\text{C NMR}$  (100 MHz,  $\text{CDCl}_3$ )  $\delta$  161.2 (d,  $J = 243.2$  Hz), 141.5, 137.4 (d,  $J = 3.2$  Hz), 137.3, 129.7 (d,  $J = 7.8$  Hz), 129.2, 125.8, 115.0 (d,  $J = 21.1$  Hz), 73.5, 40.4, 31.2, 21.1; **HPLC** (Chiralcel OJ-H column,  $n$ -hexane : isopropanol = 95 : 5 (v/v); 1.0 mL/min; 220 nm):  $t_R = 15.1$  min (major), 18.2 min (minor).

(*R*)-3-(4-chlorophenyl)-1-(*p*-tolyl)propan-1-ol<sup>7</sup> (**5c**, known compound)

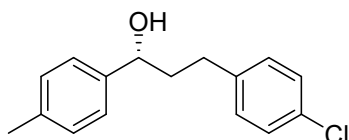

Colorless oil, 100.1 mg, 77% yield, 98% ee;  $[\alpha]_D^{25} = +18.8$  ( $c = 1.0$ ,  $\text{CHCl}_3$ );  $^1\text{H NMR}$  (400 MHz,  $\text{CDCl}_3$ )  $\delta$  7.24 – 7.08 (m, 8H), 4.60 (dd,  $J = 7.8, 5.5$  Hz, 1H), 2.72 – 2.56 (m, 2H), 2.34 (s, 3H), 2.12 – 2.03 (m, 1H), 1.99 – 1.90 (m, 2H);  $^{13}\text{C NMR}$  (100 MHz,  $\text{CDCl}_3$ )  $\delta$  141.4, 140.2, 137.4, 131.4, 129.8, 129.2, 128.4, 125.8, 73.5, 40.2, 31.4, 21.1; **HPLC** (Chiralcel OD-H column,  $n$ -hexane : isopropanol = 97 : 3 (v/v); 1.0 mL/min; 220 nm):  $t_R = 17.1$  min (major), 18.5 min (minor).

(*R*)-3-(2-bromo-5-chlorophenyl)-1-(4-chlorophenyl)propan-1-ol (**5d**, unknown compound)

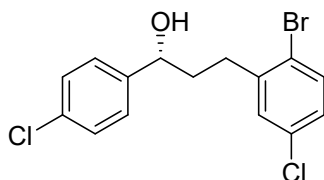

Colorless oil, 136.0 mg, 76% yield, 93% ee;  $[\alpha]_D^{25} = +21.4$  ( $c = 1.0$ ,  $\text{CHCl}_3$ );  $^1\text{H NMR}$  (400 MHz,  $\text{CDCl}_3$ )  $\delta$  7.47–7.40 (m, 1H), 7.35–7.26 (m, 4H), 7.19 (d,  $J = 2.6$  Hz, 1H), 7.03 (dd,  $J = 8.4, 2.6$  Hz, 1H), 4.69 (dd,  $J = 7.8, 5.1$  Hz, 1H), 2.87–2.67 (m, 2H), 2.12–1.92 (m, 3H);  $^{13}\text{C NMR}$  (100 MHz,  $\text{CDCl}_3$ )  $\delta$  142.7, 142.6, 133.8, 133.4, 133.3, 130.2, 128.7, 127.8, 127.2, 122.2, 73.0, 38.5, 32.3; **HPLC** (Chiralcel OD-H column,  $n$ -hexane : isopropanol = 95 : 5 (v/v); 1.0 mL/min; 220 nm):  $t_R = 11.1$  min (minor), 11.7 min (major).

## References

1. R. Miao, Y. Xia, Y. Wei, L. Ouyang and R. Luo, *Molecules*, 2022, **27**, 3898.
2. F. C. Demidoff, G. S. Caleffi, M. Figueiredo and P. R. R. Costa, *J. Org. Chem.*, 2022, **87**, 14208–14222.
3. T. W. Ng, G. Liao, K. K. Lau, H. J. Pan and Y. Zhao, *Angew. Chem. Int. Ed.*, 2020, **59**, 11384–11389.
4. K. Wang, L. Zhang, W. J. Tang, H. M. Sun, D. Xue, M. Lei, J. L. Xiao and C. Wang, *Angew. Chem. Int. Ed.*, 2020, **59**, 11408–11415.
5. Y. Wang and R. Franzén, *Synlett*, 2012, **23**, 925–929.
6. S. Genç, B. Arslan, S. Gülcemal, S. Günnaz, B. Çetinkaya and D. Gülcemal, *J. Org. Chem.*, 2019, **84**, 6286–6297.
7. J. Yang, X. Liu, D. L. Meng, H. Y. Chen, Z. H. Zong, T. T. Feng and K. Sun, *Adv. Synth. Catal.*, 2012, **354**, 328–334.
8. R. Babu, M. Subaramanian, S. P. Midya and E. Balaraman, *Org. Lett.*, 2021, **23**, 3320–3325.
9. T. T. Liu, L. D. Wang, K. K. Wu and Z. K. Yu, *ACS Catal.*, 2018, **8**, 7201–7207.
10. E. T. Choi, M. H. Lee, Y. T. Kim and Y. S. Park, *Tetrahedron*, 2008, **64**, 1515–1522.

## 7. NMR spectra of chiral alcohols

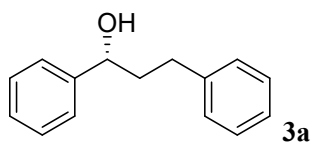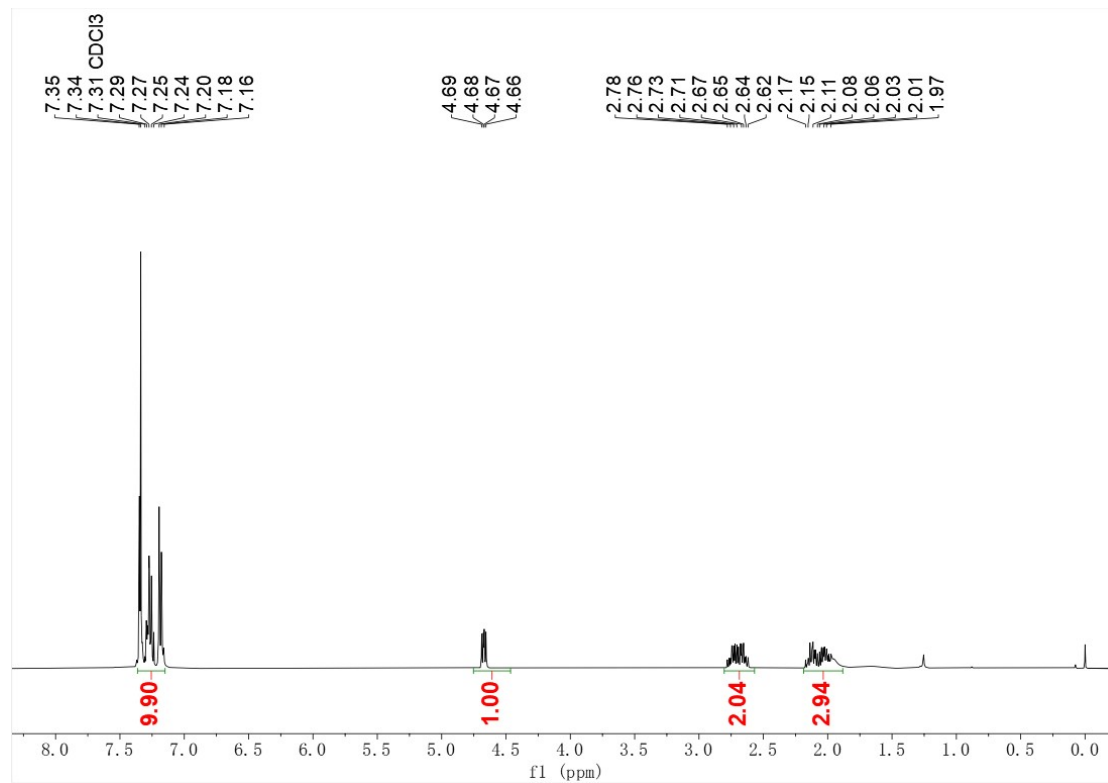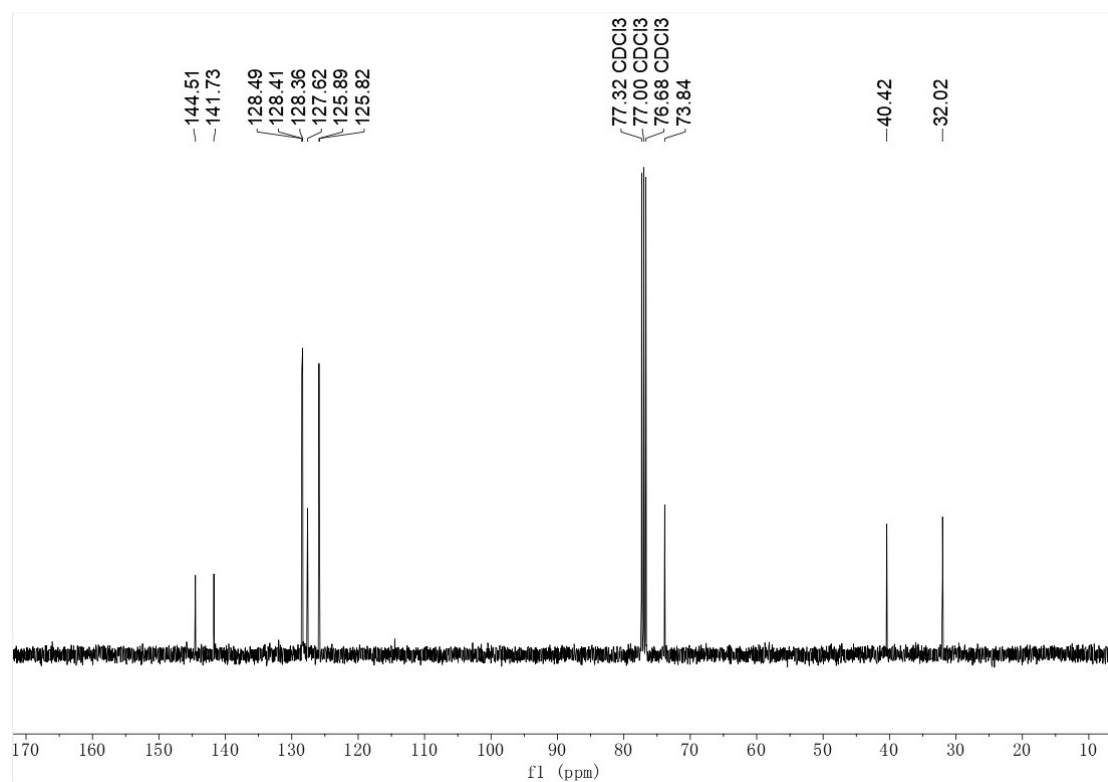

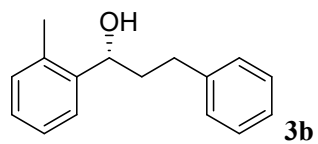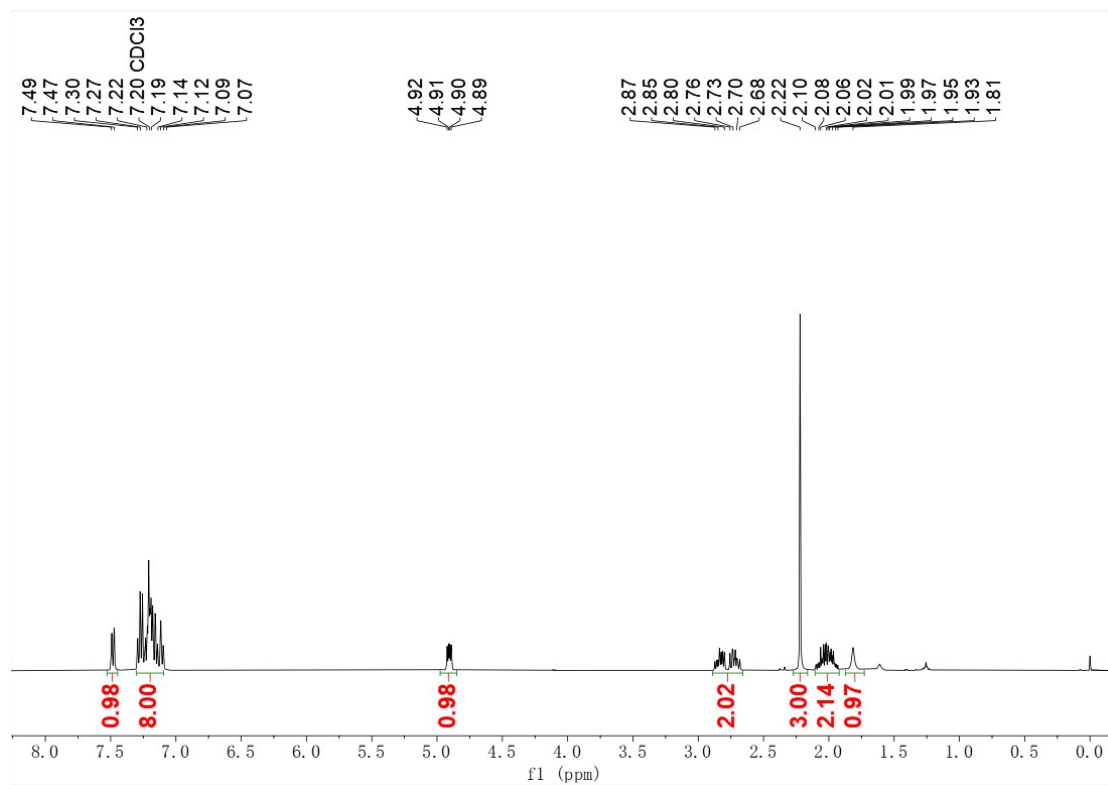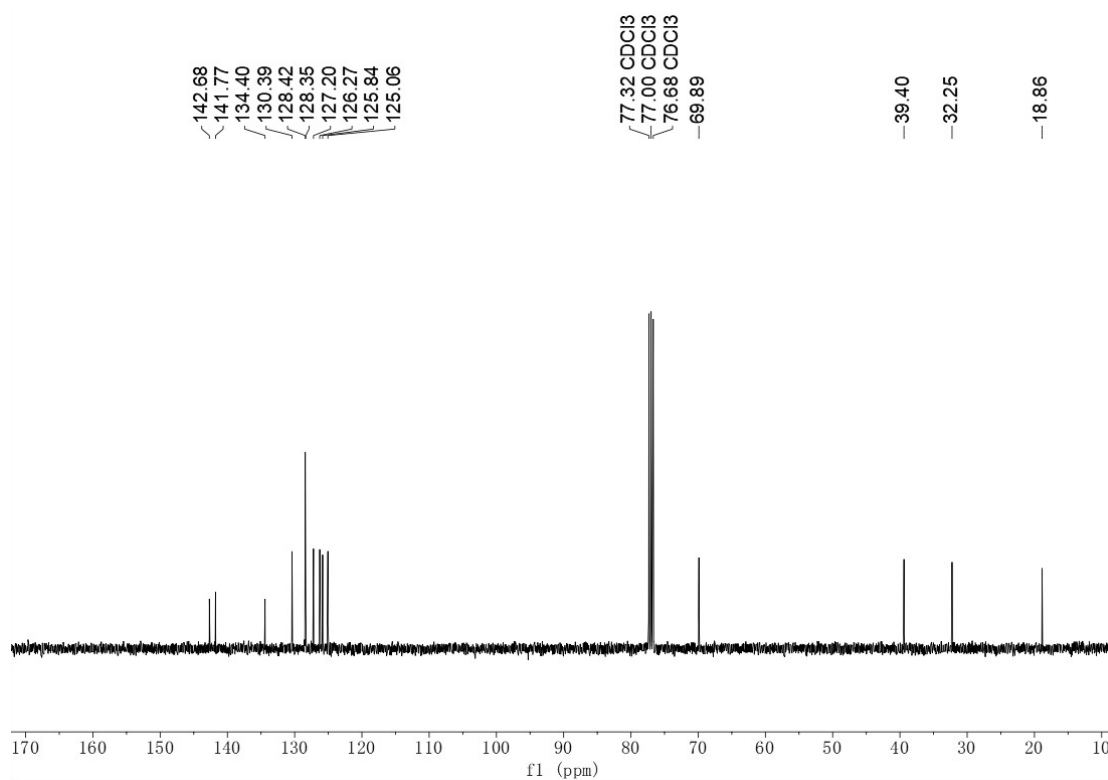



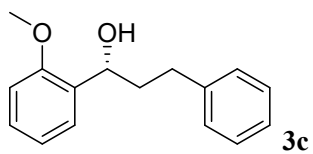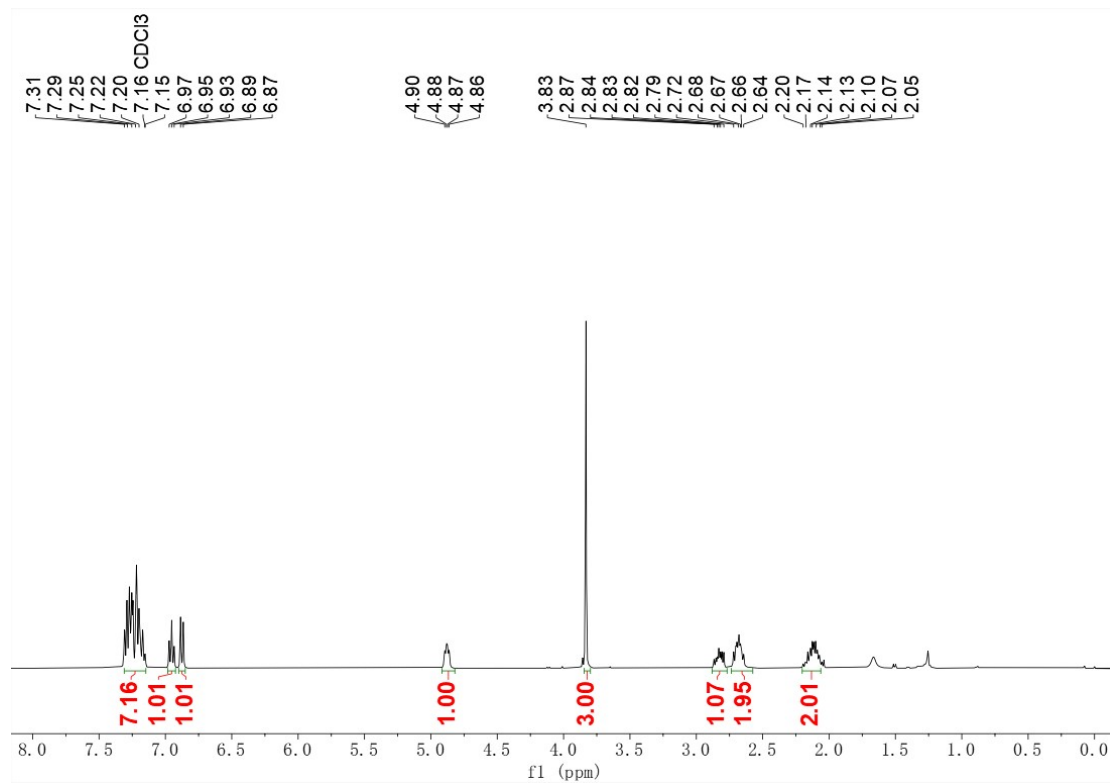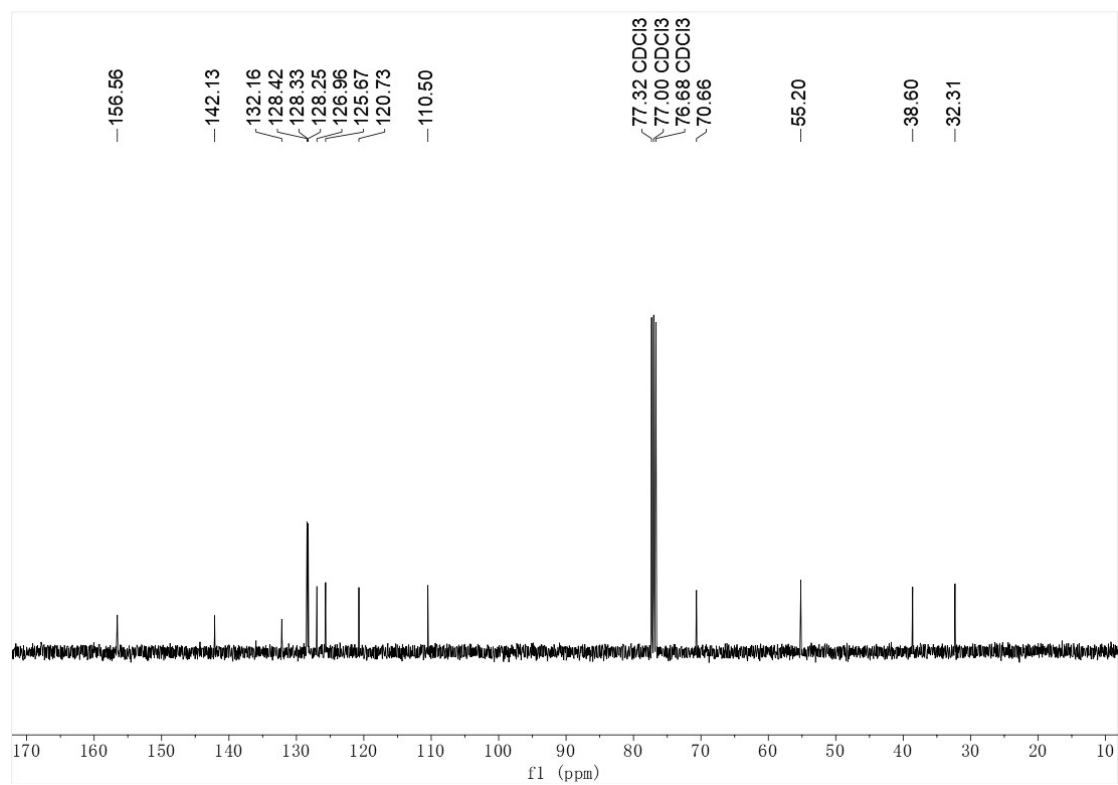

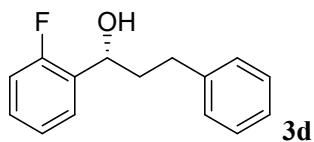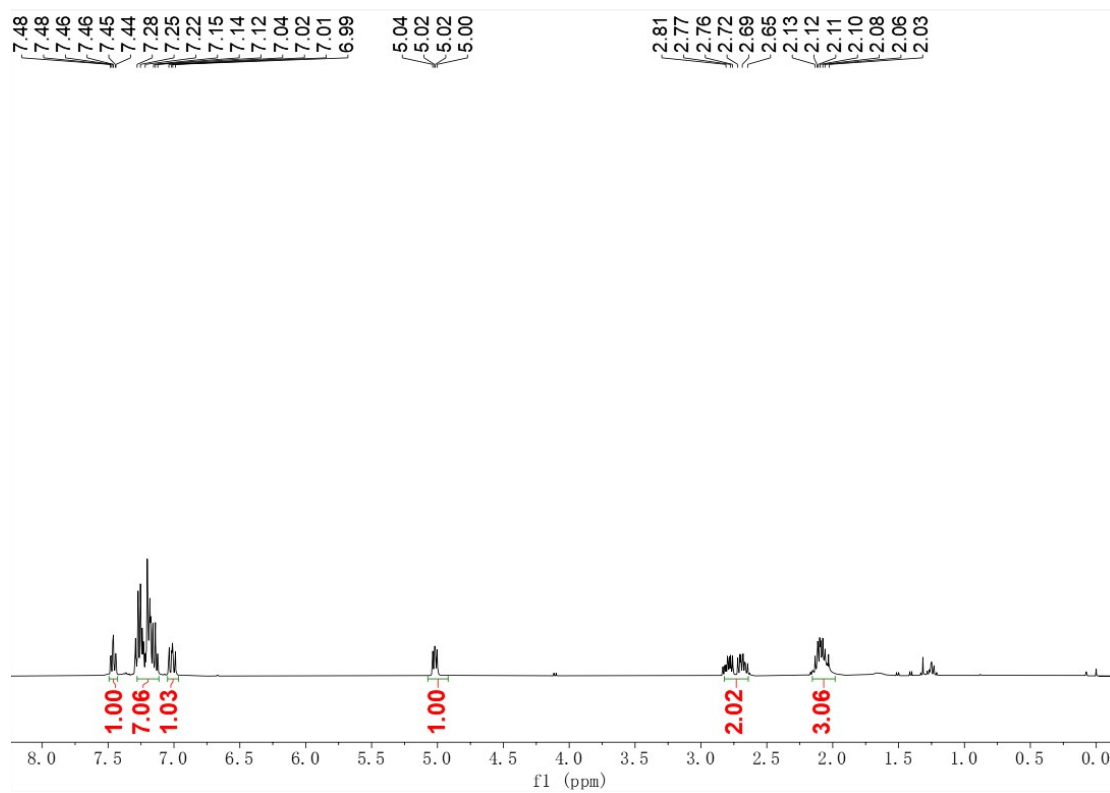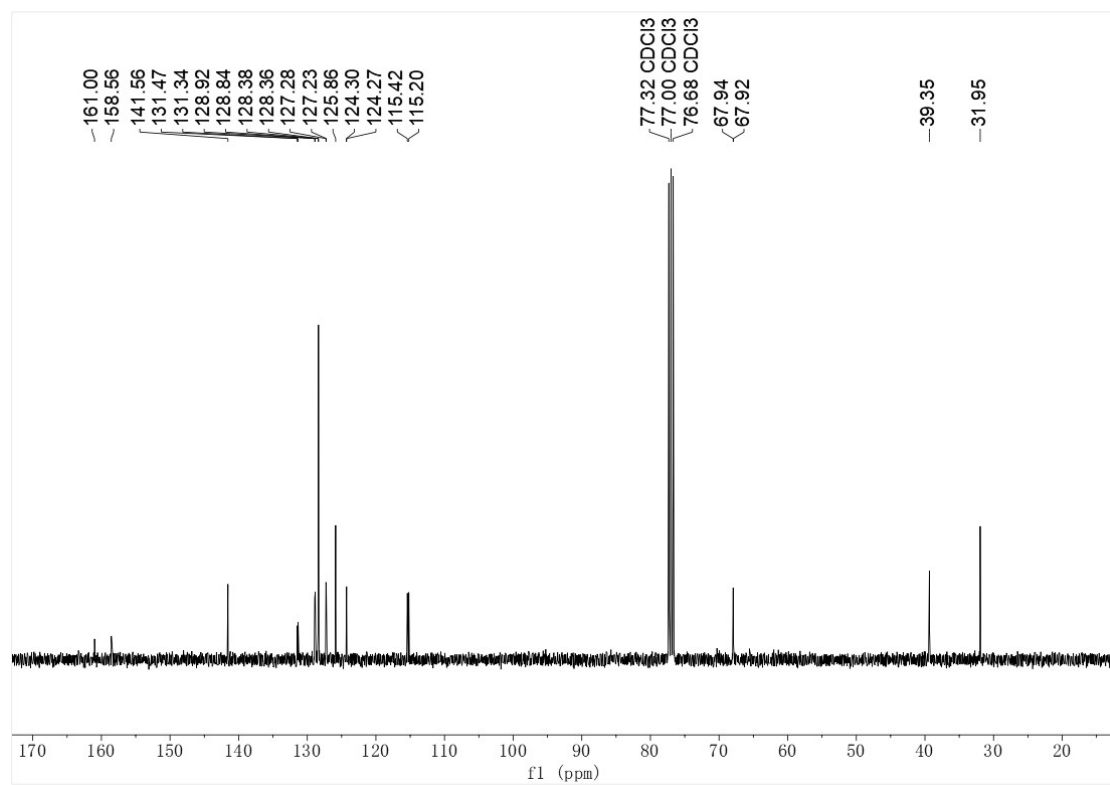

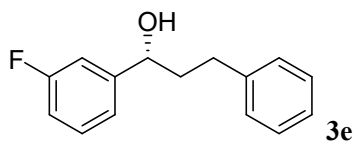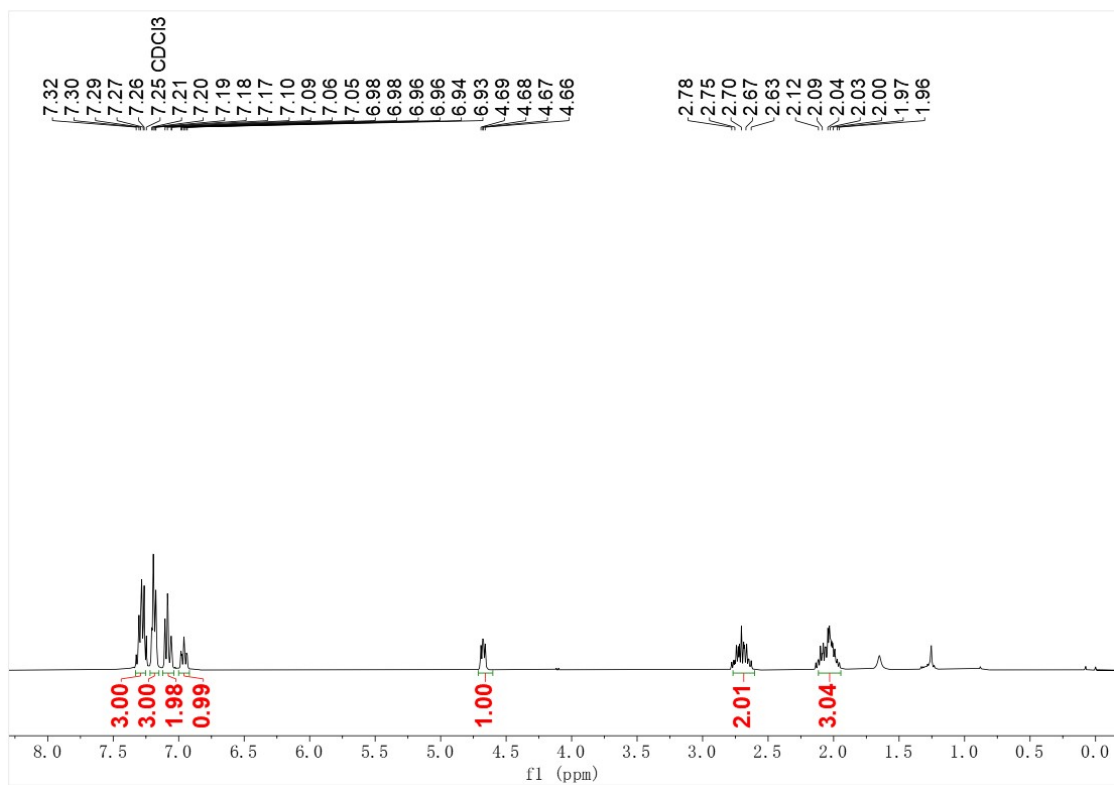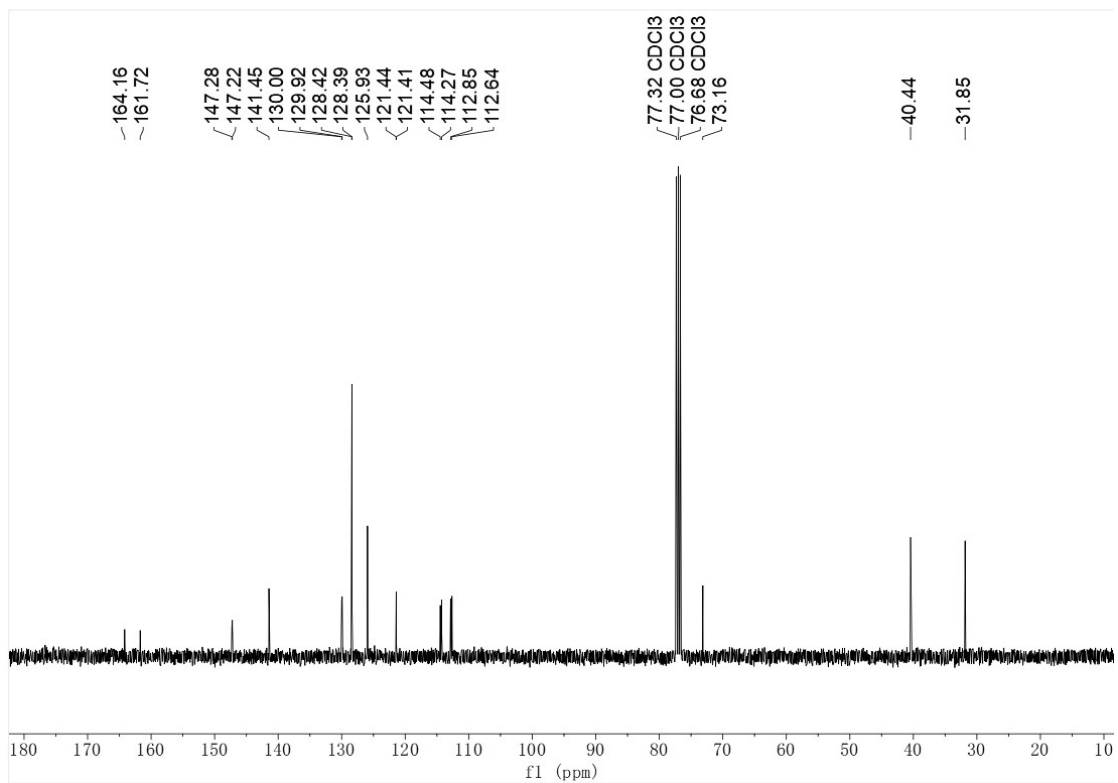

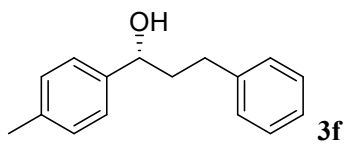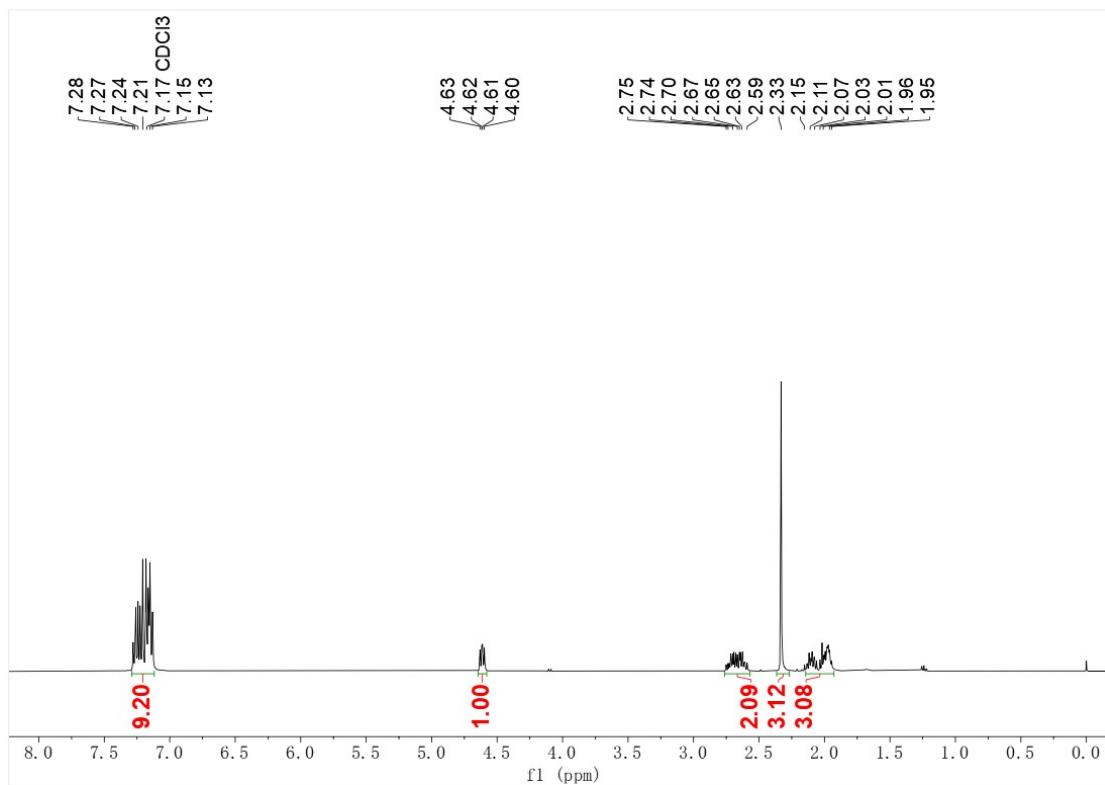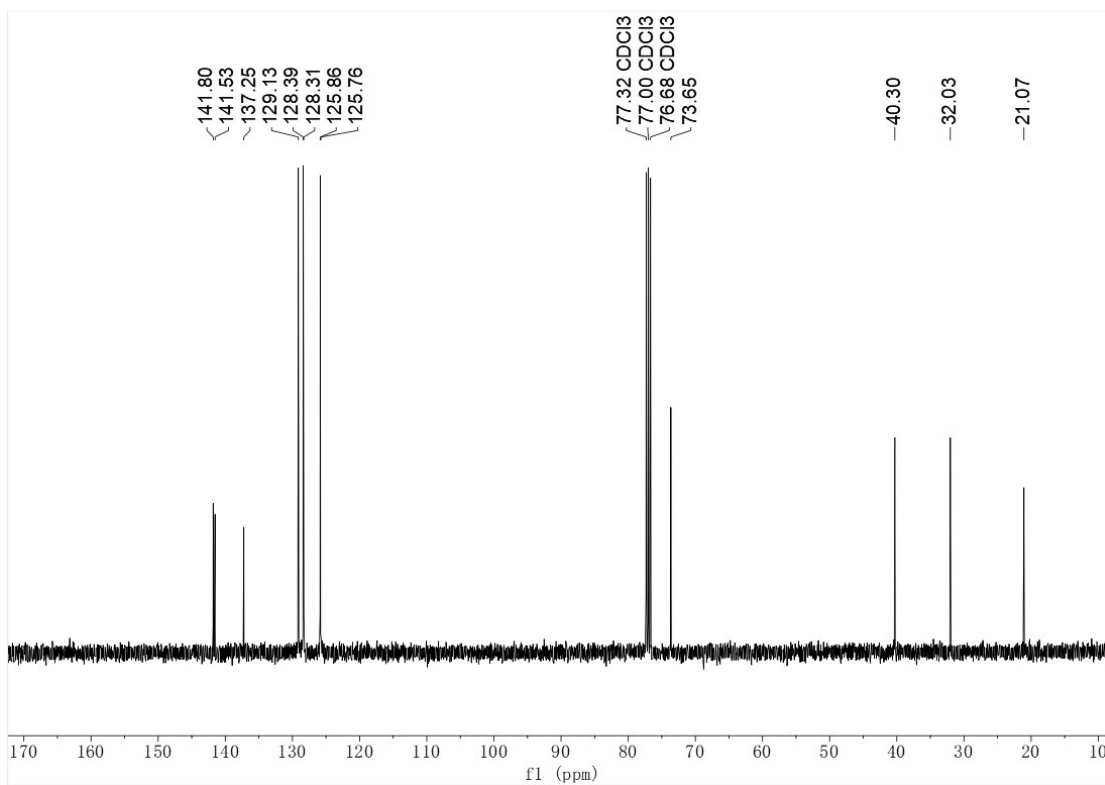

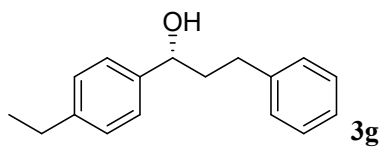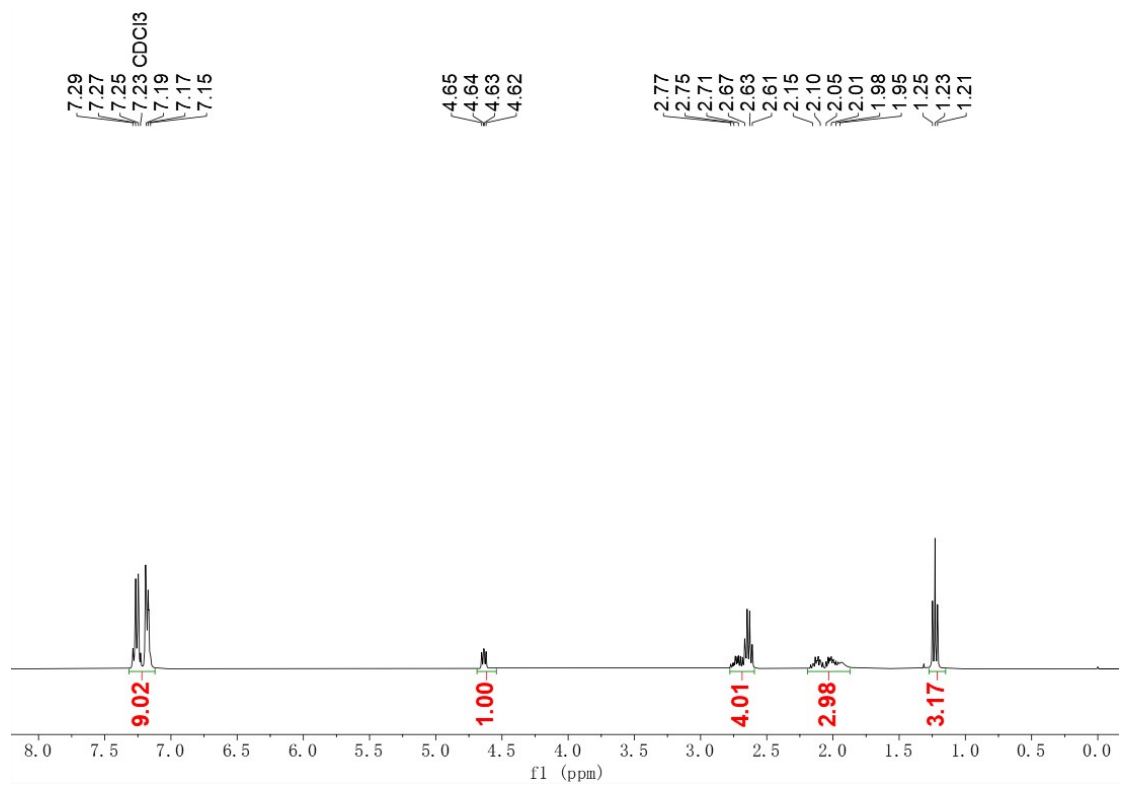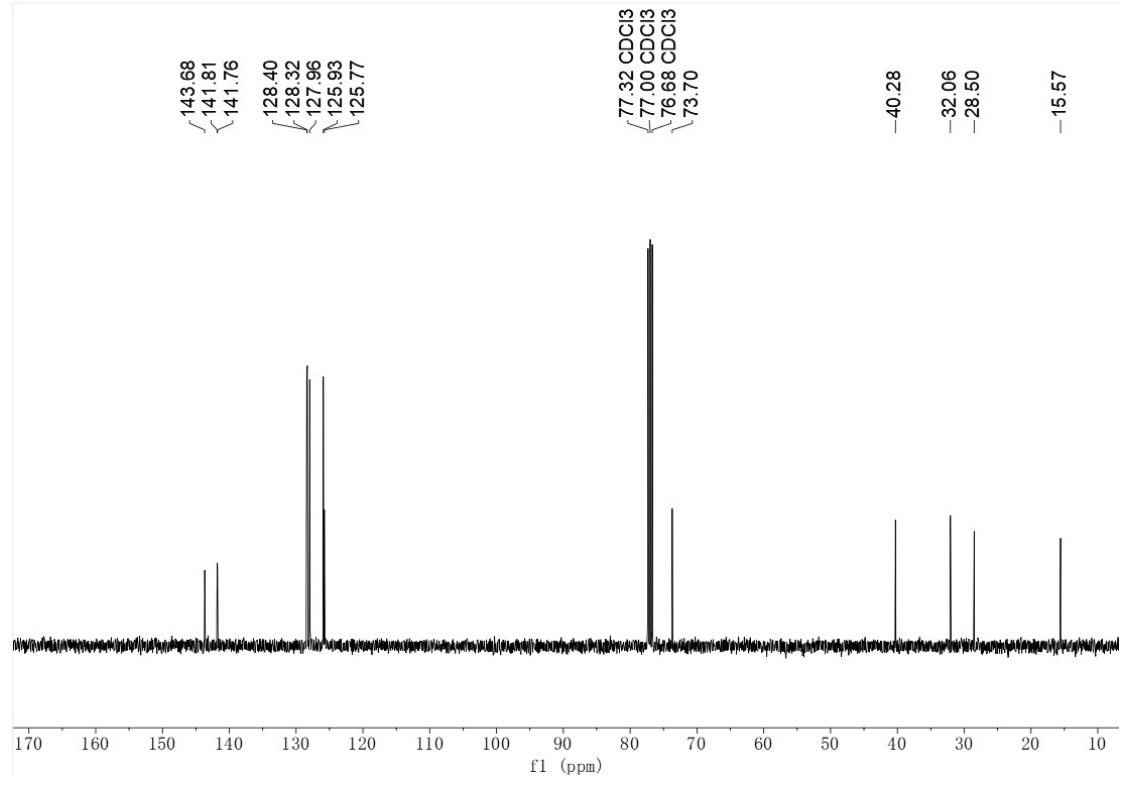

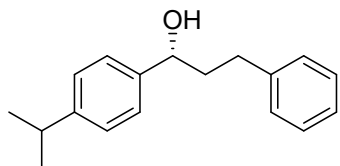

**3h**

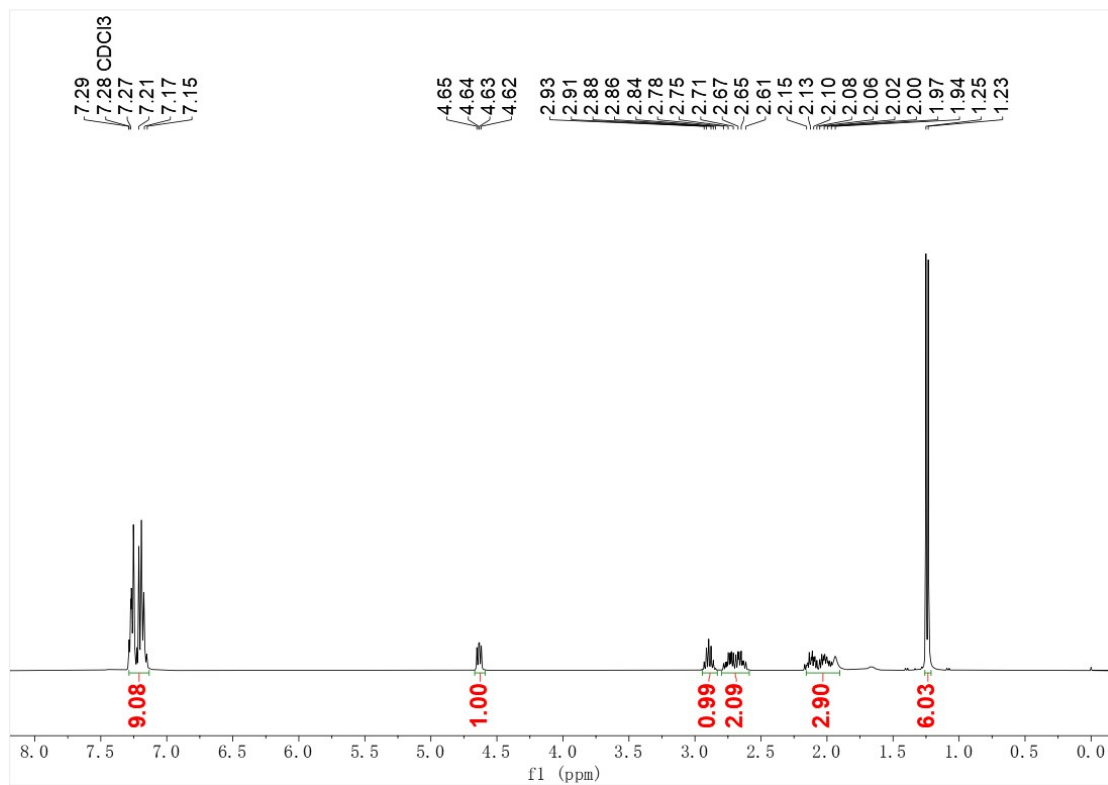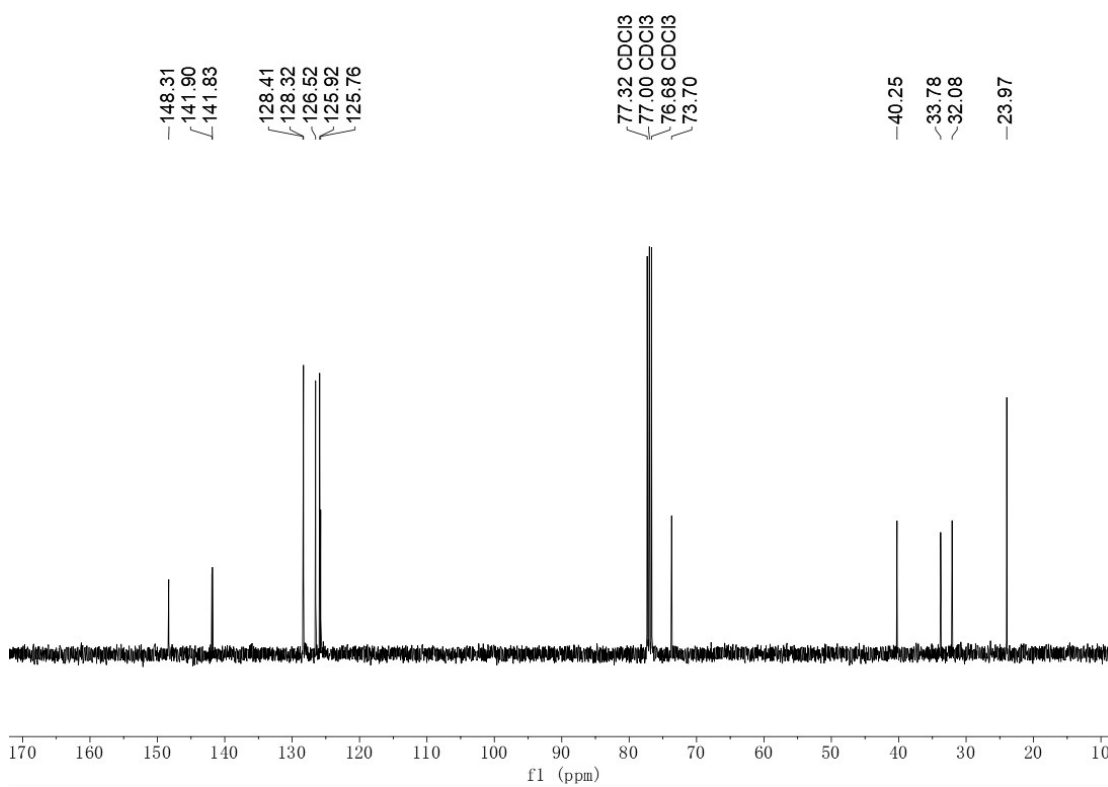

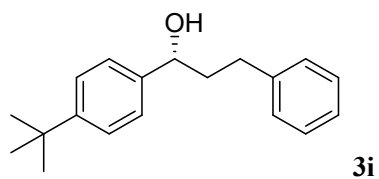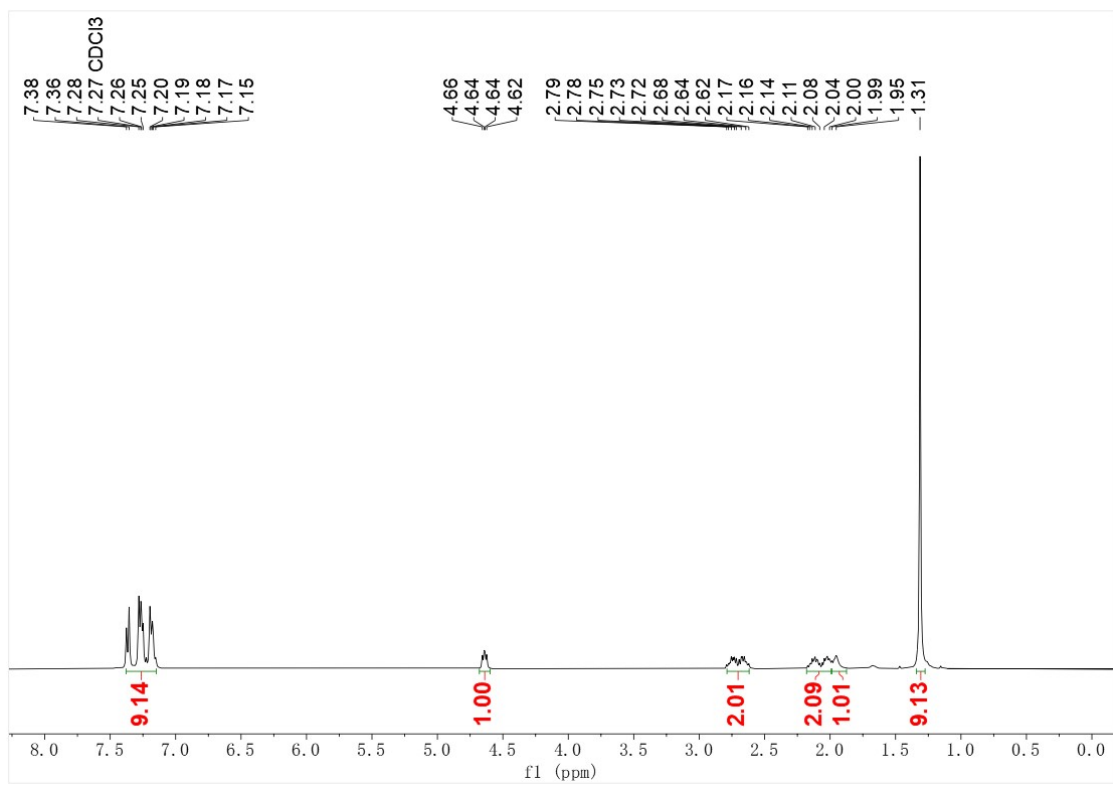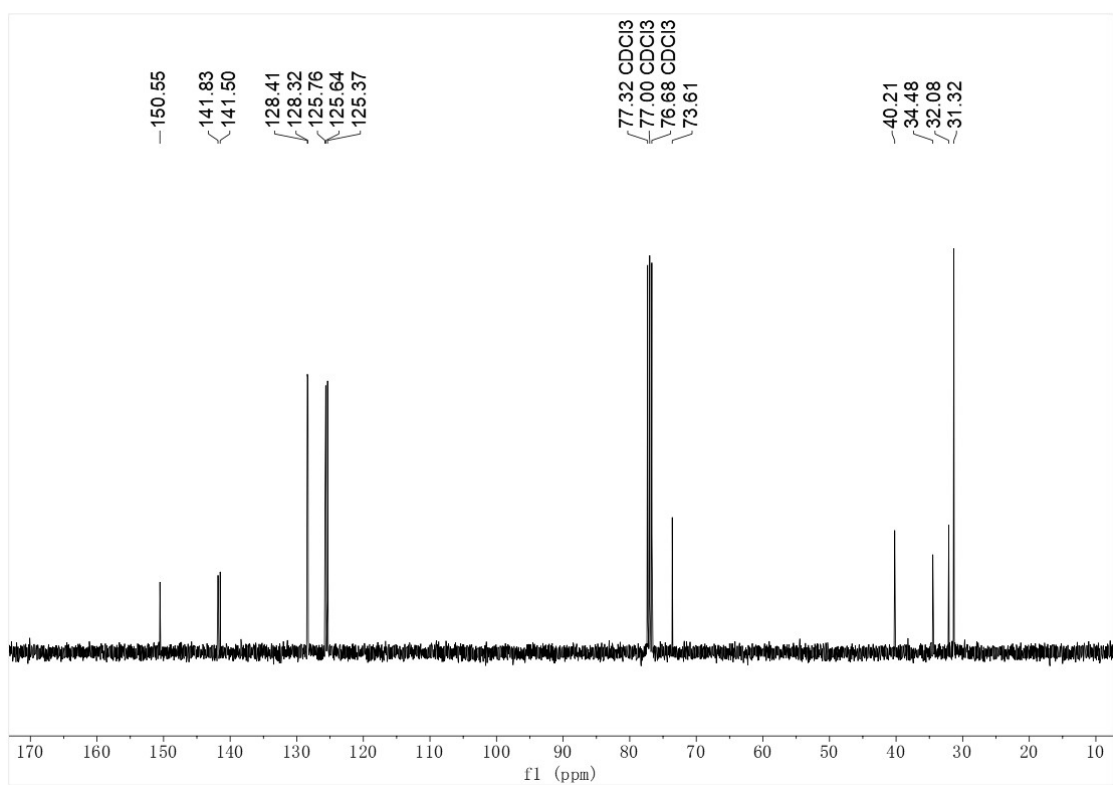

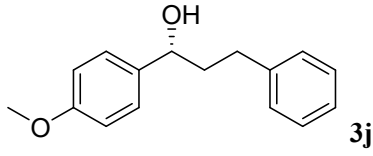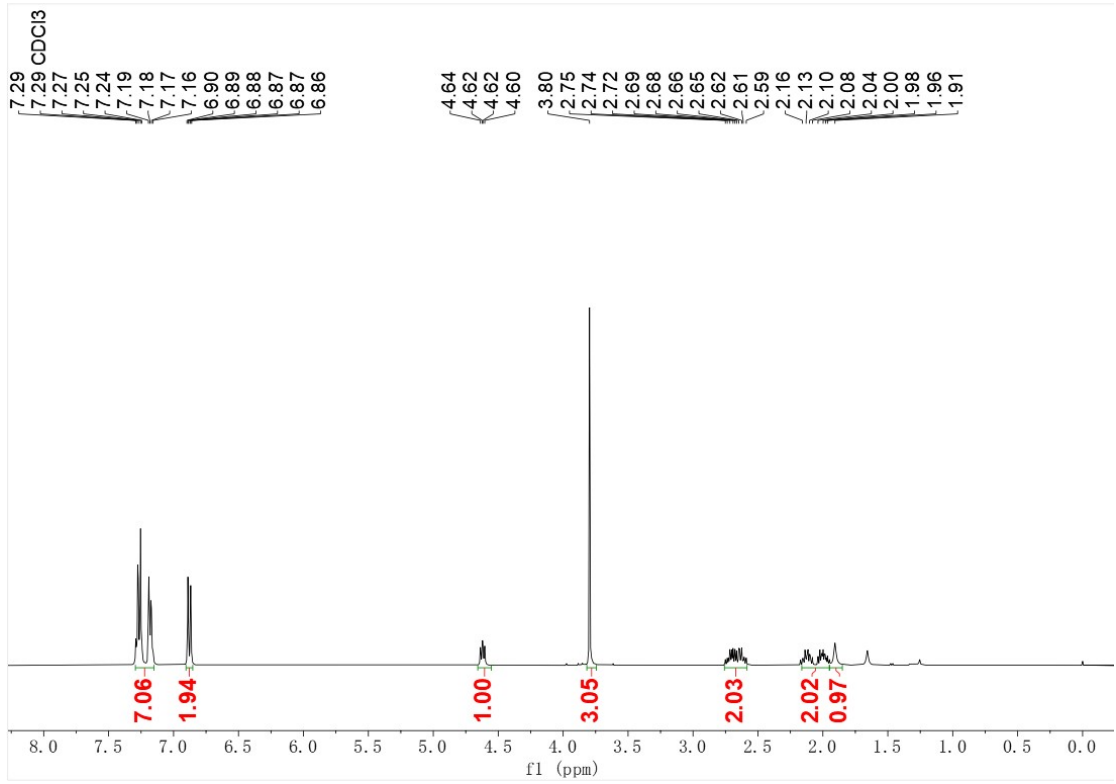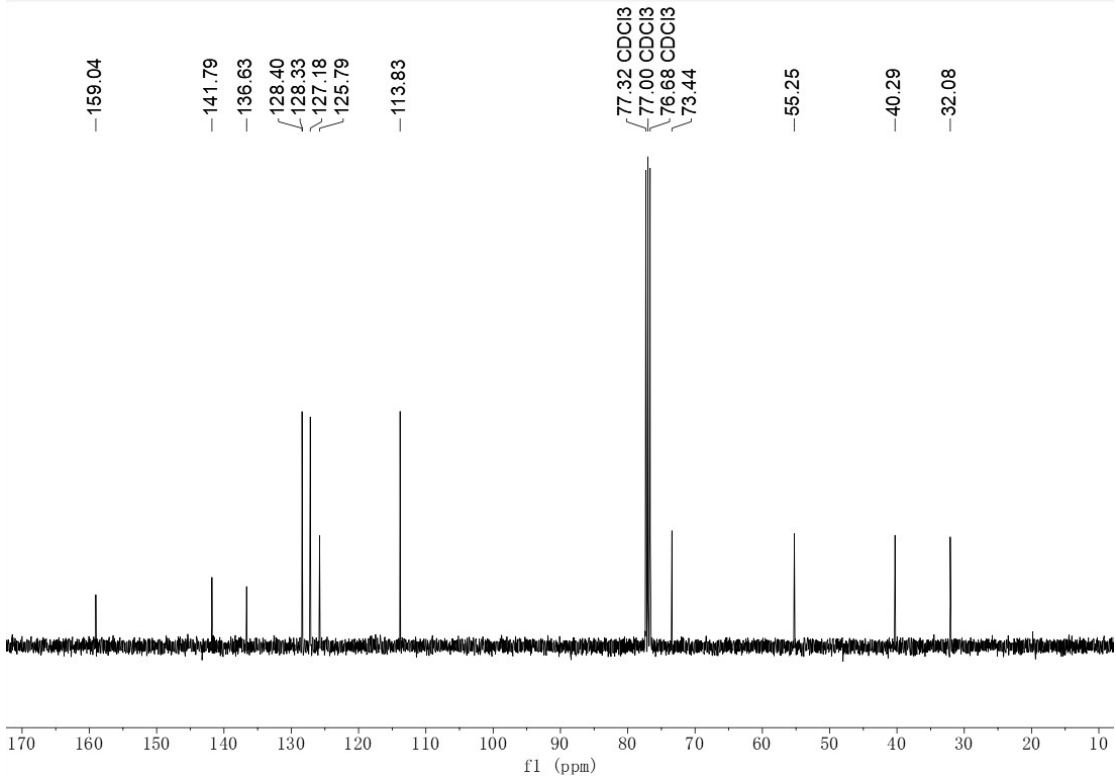



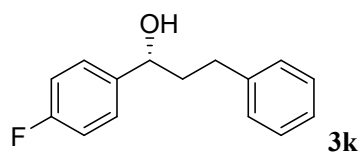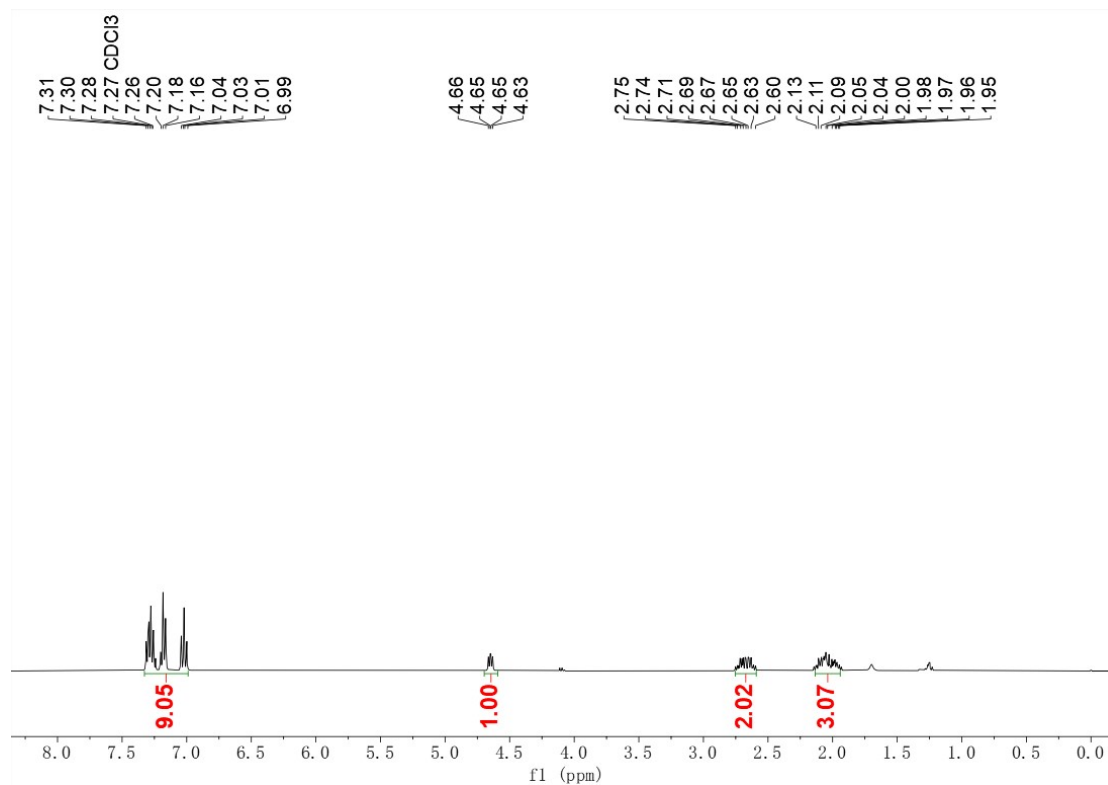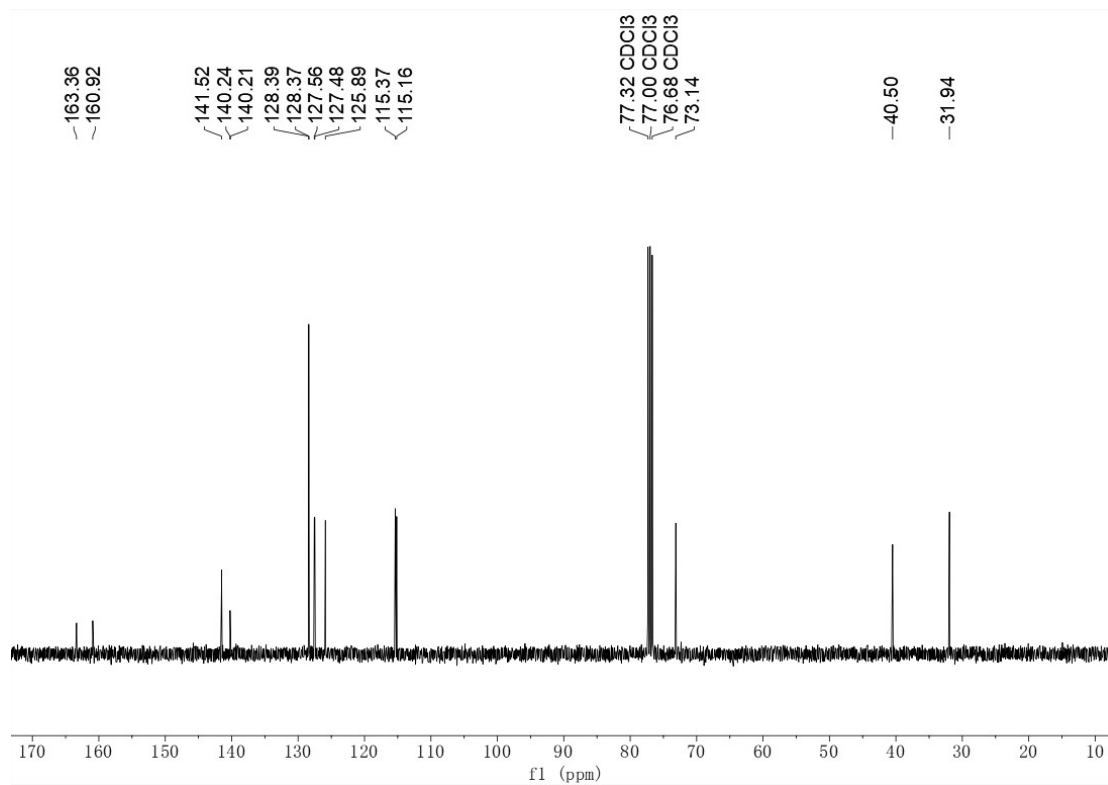

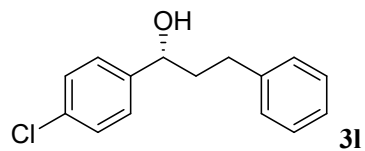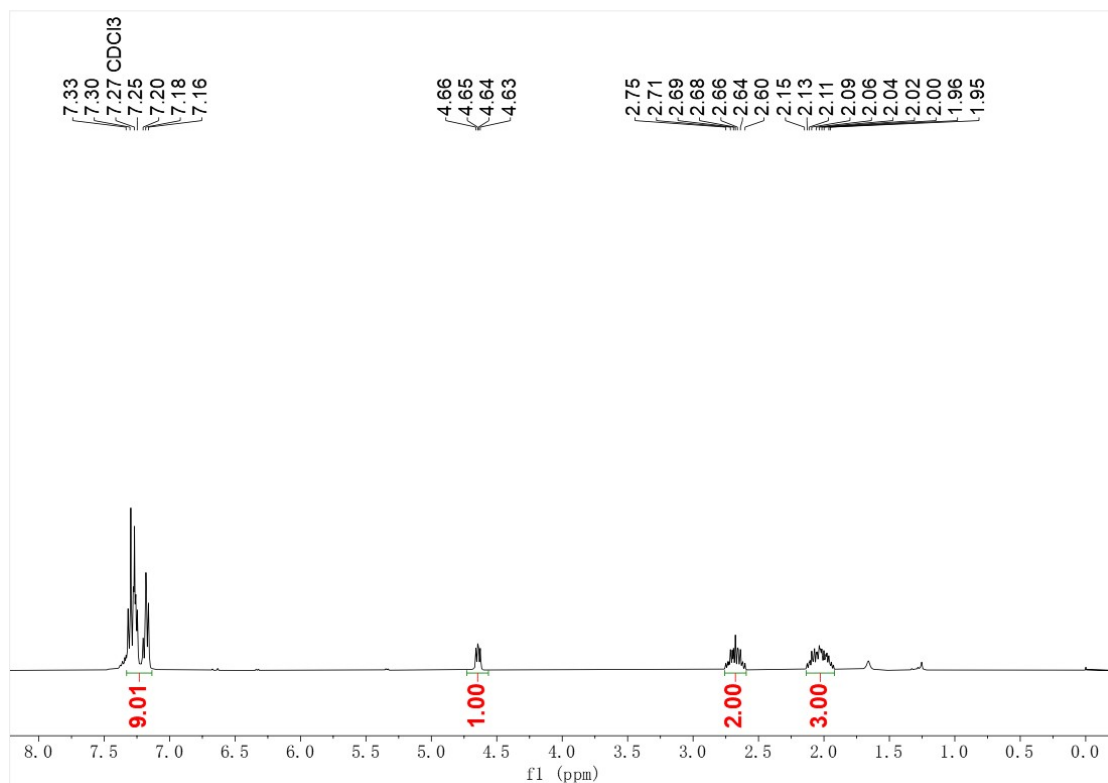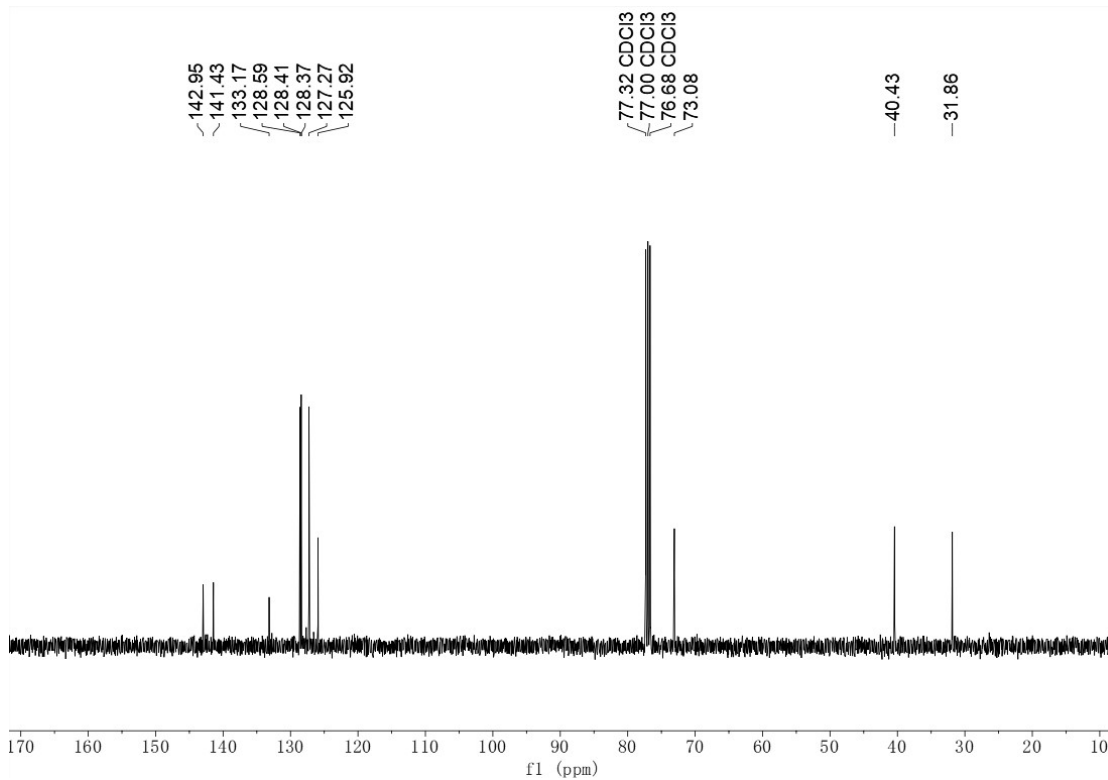

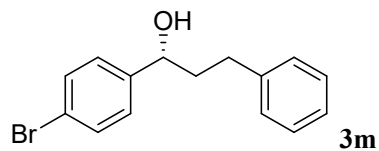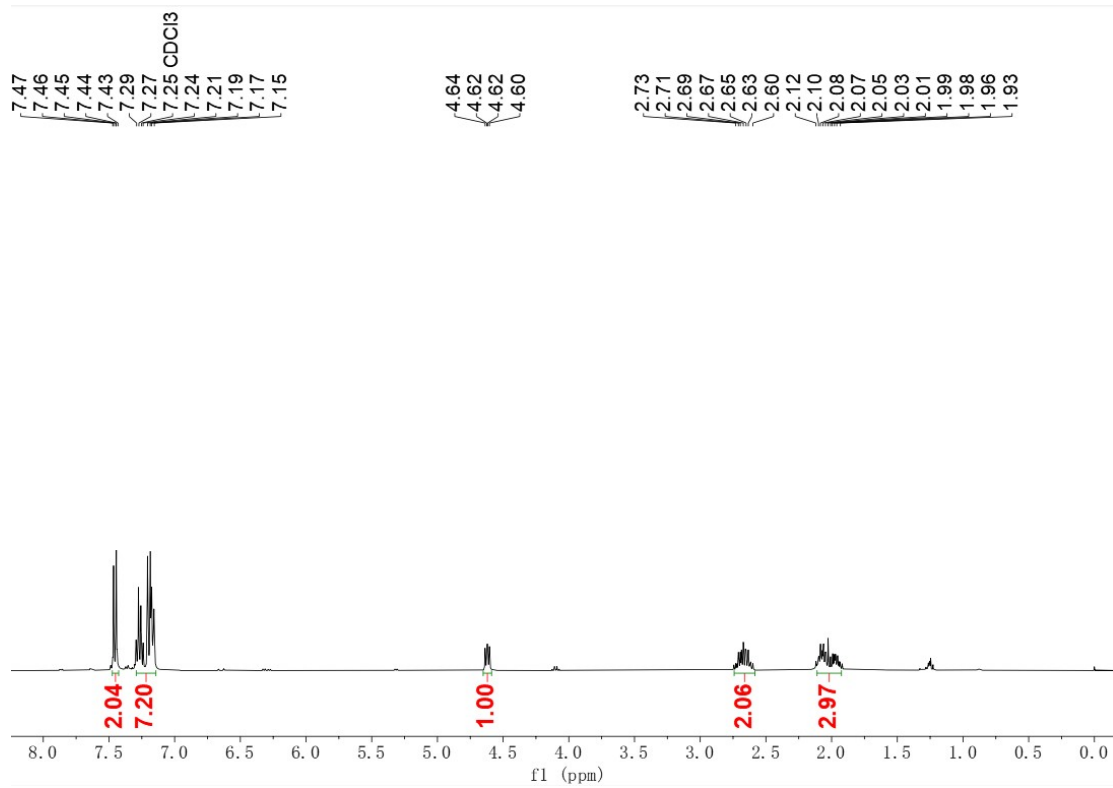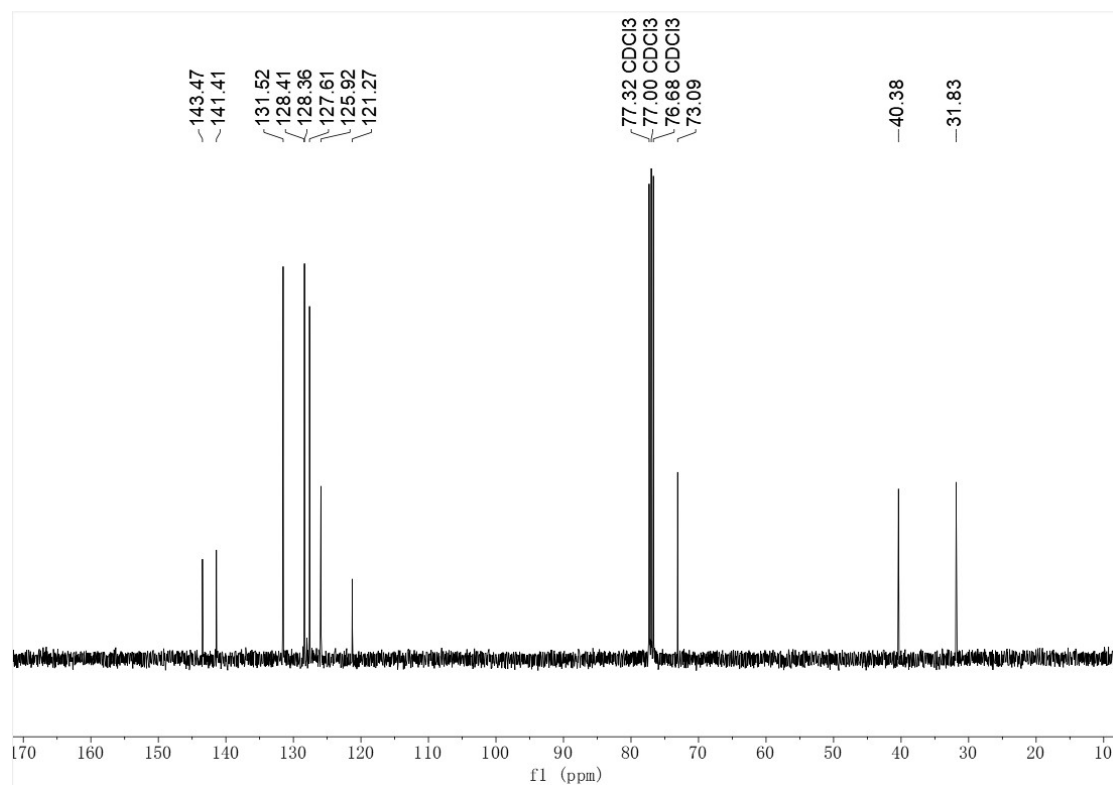

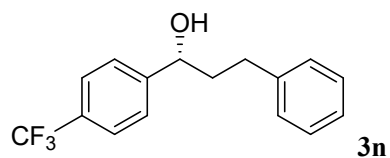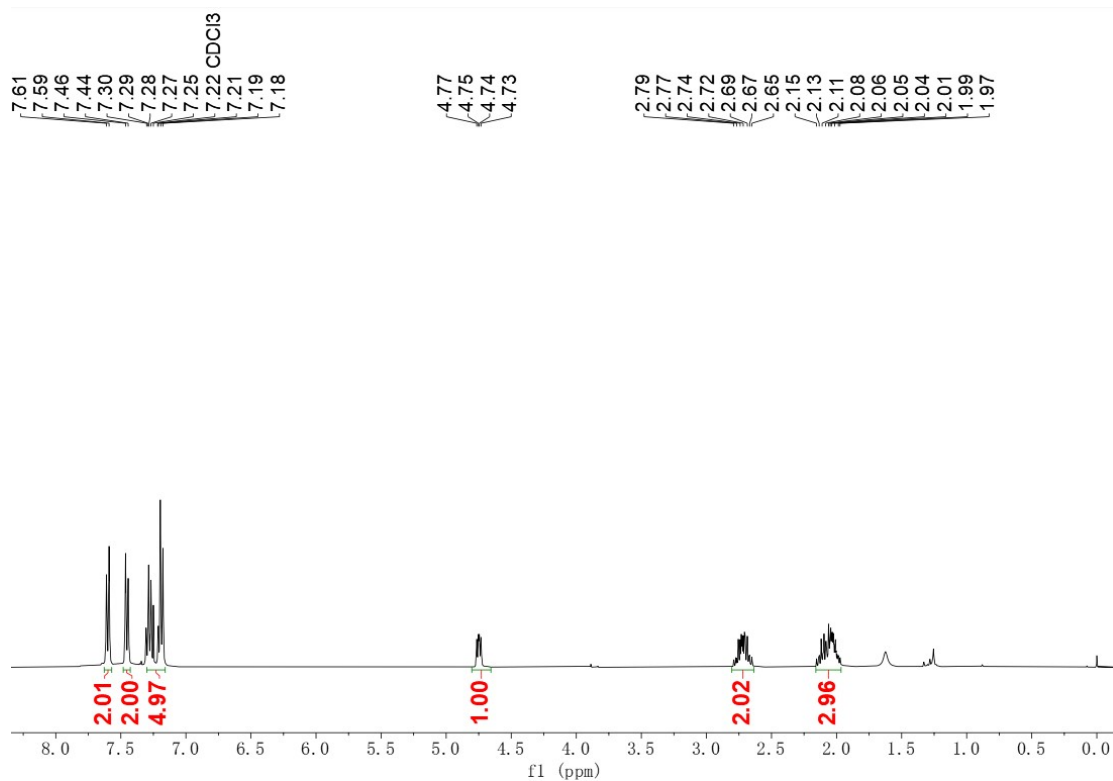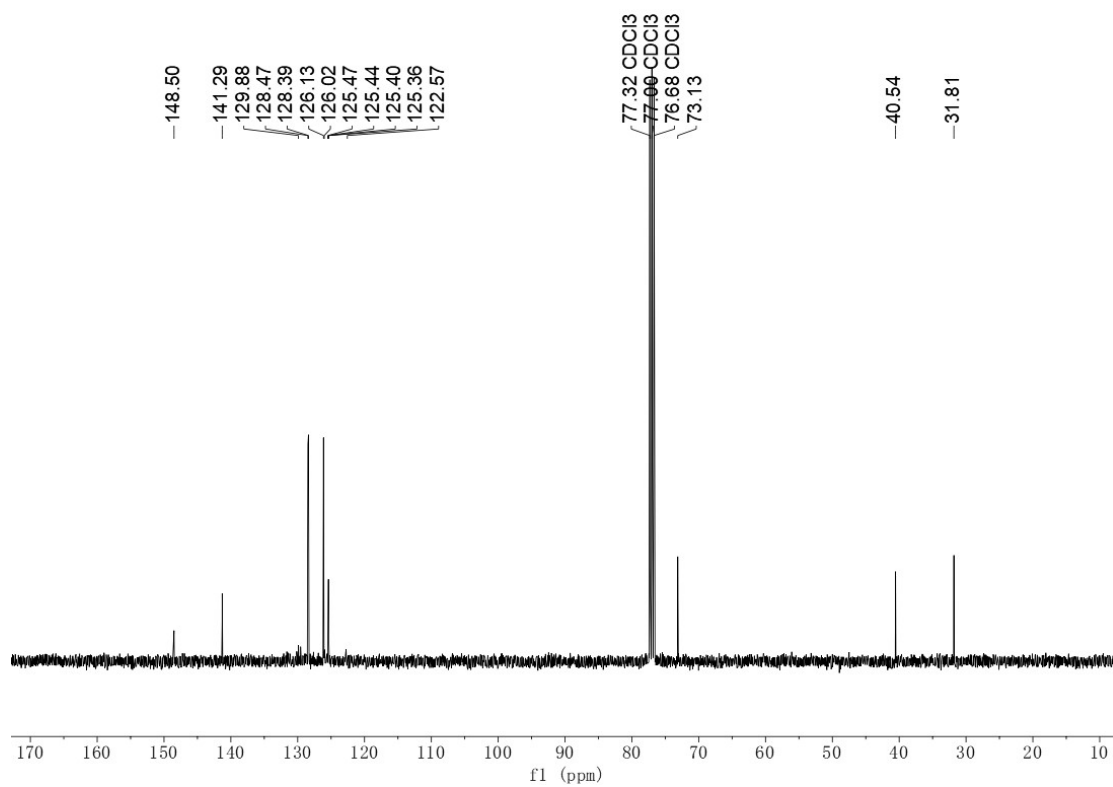

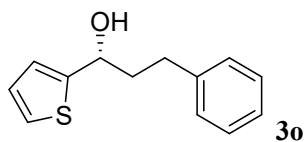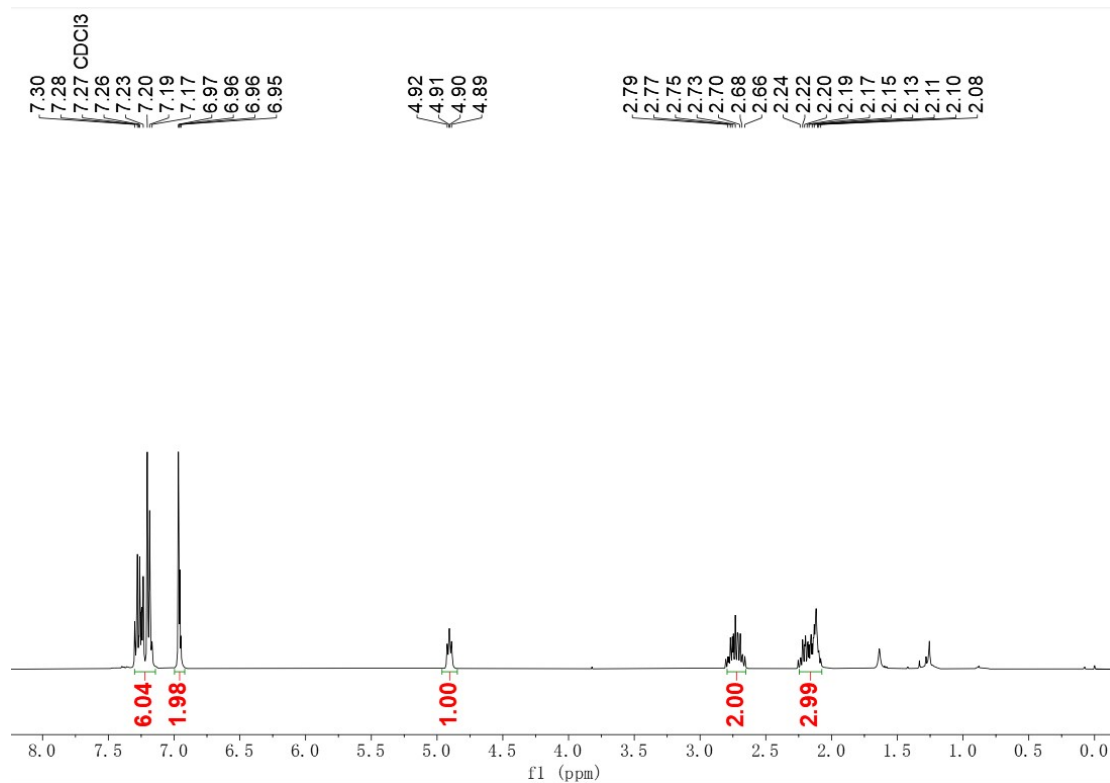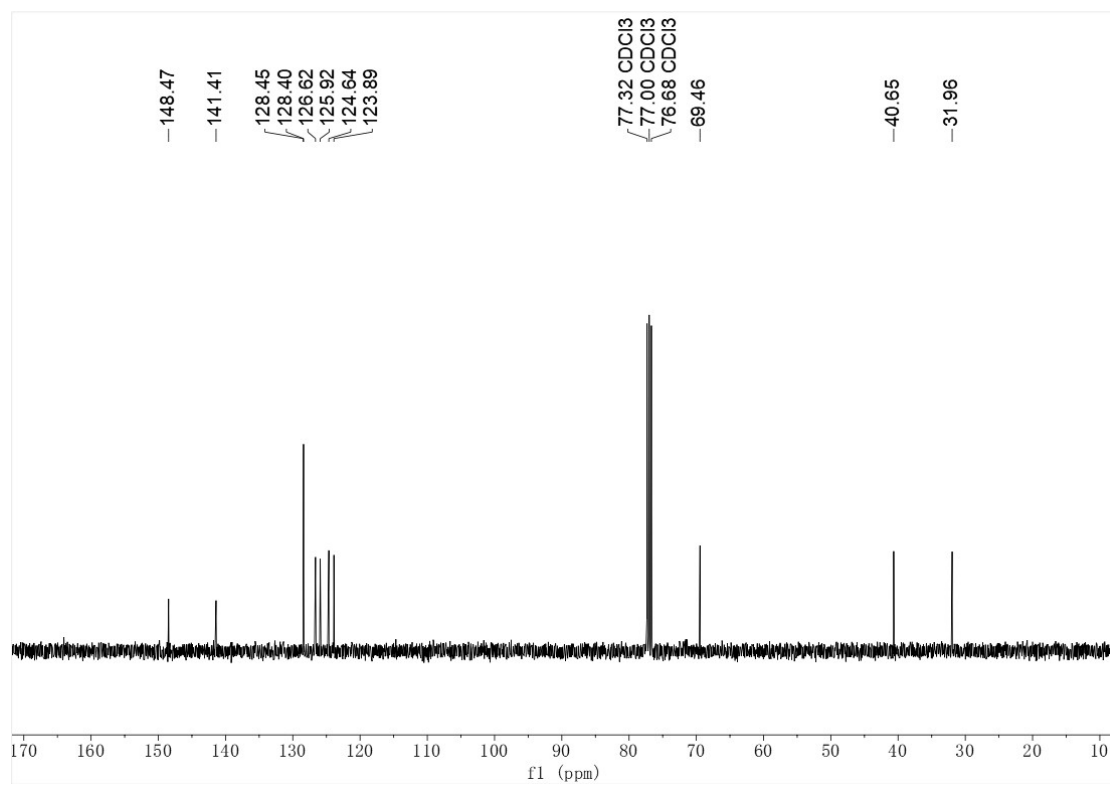

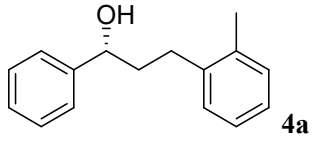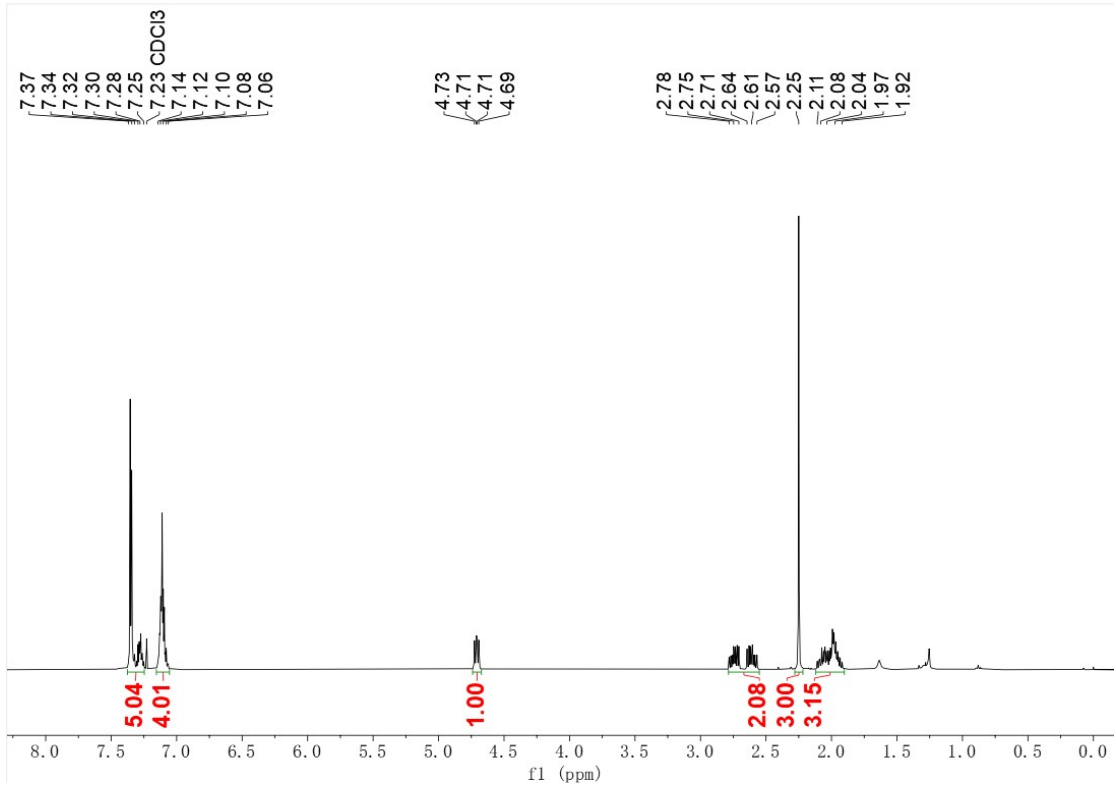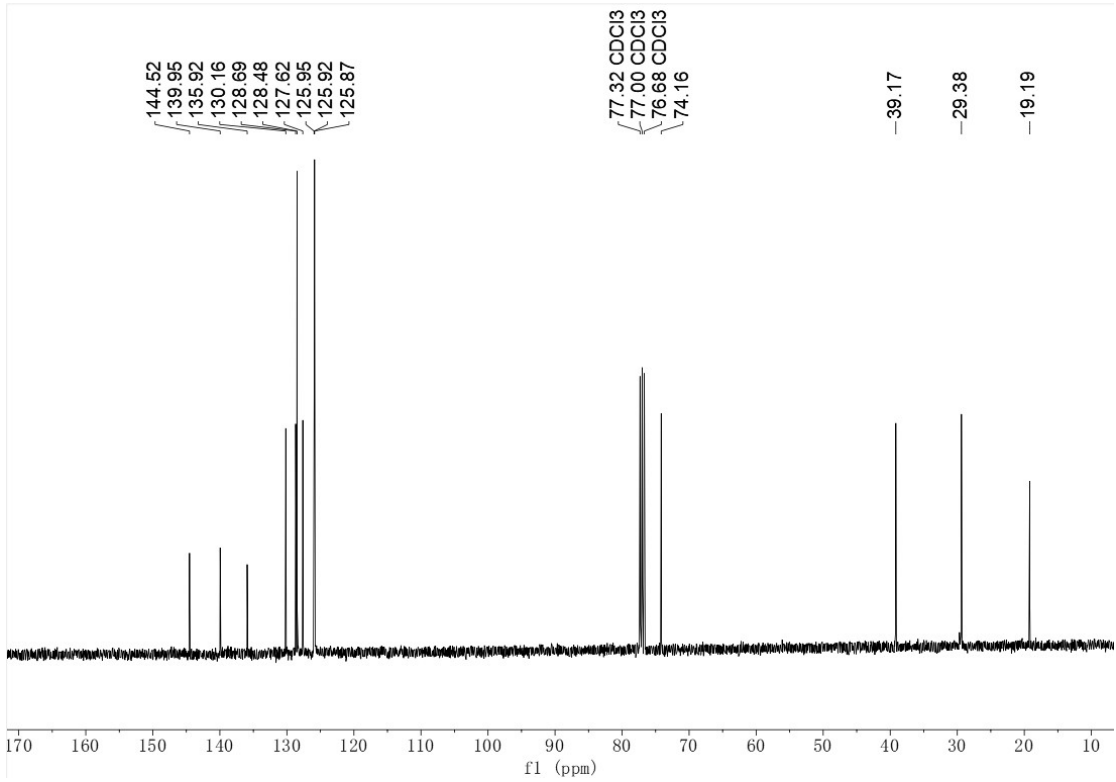

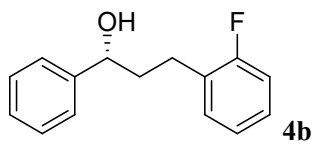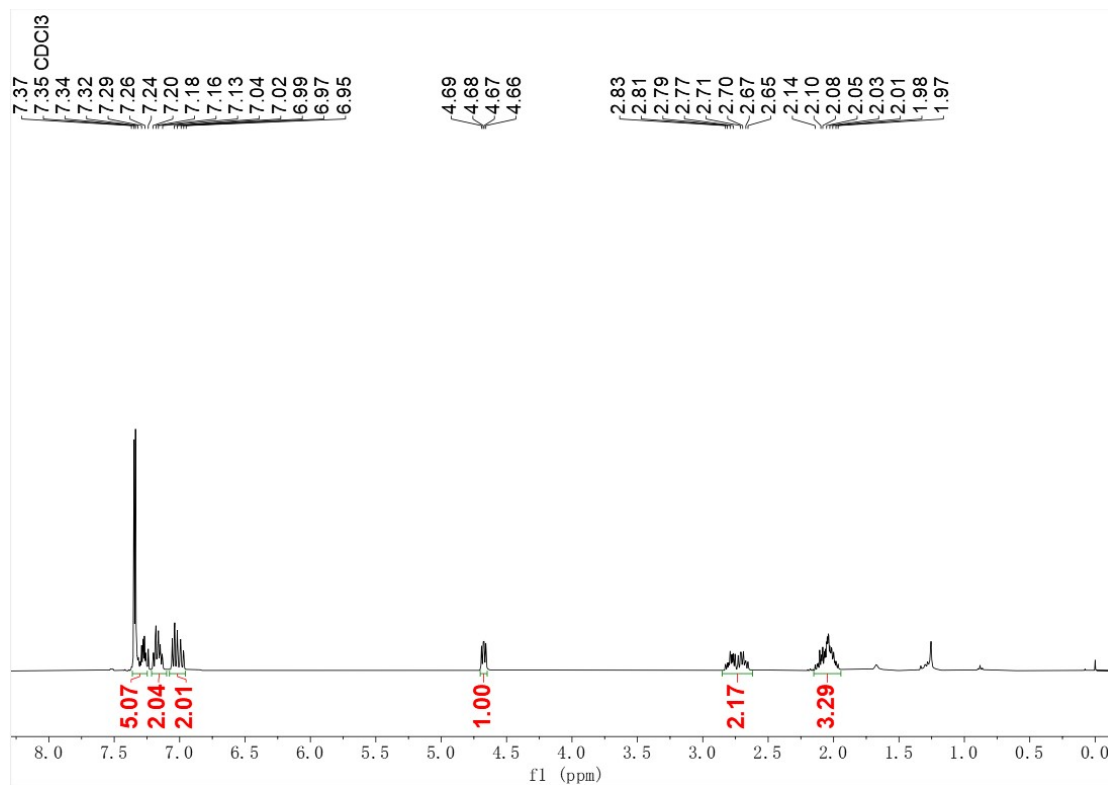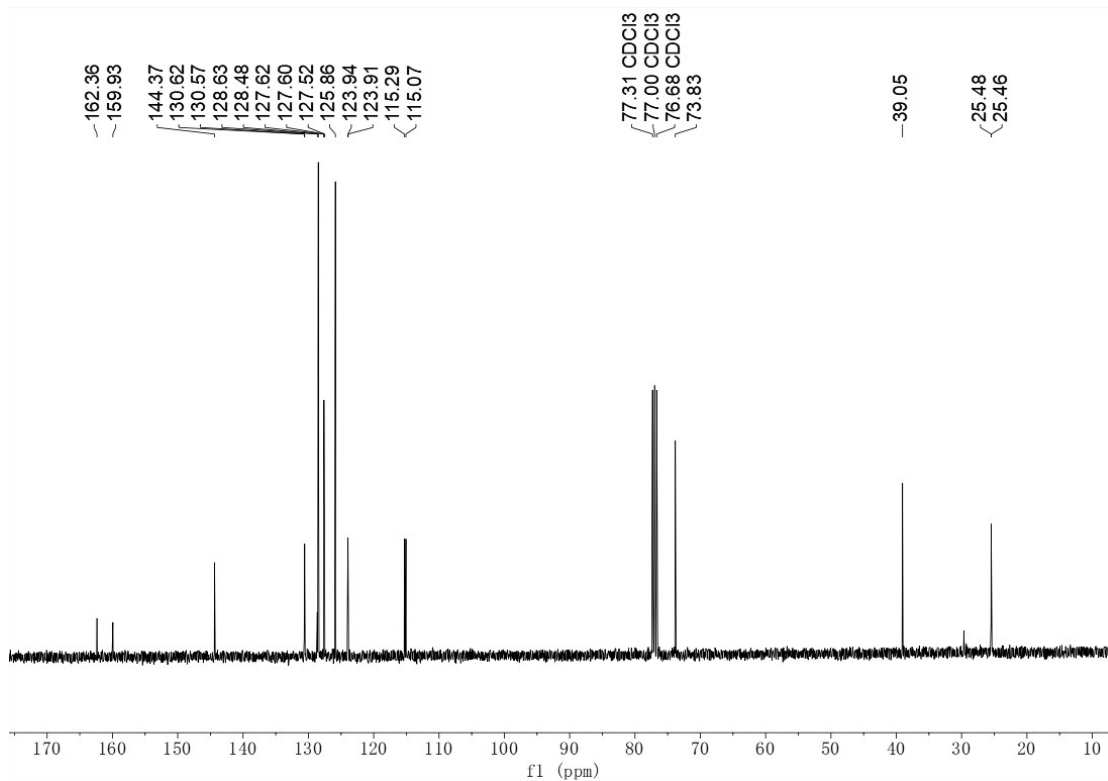

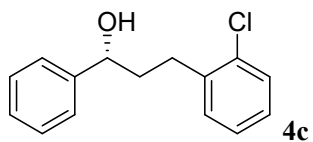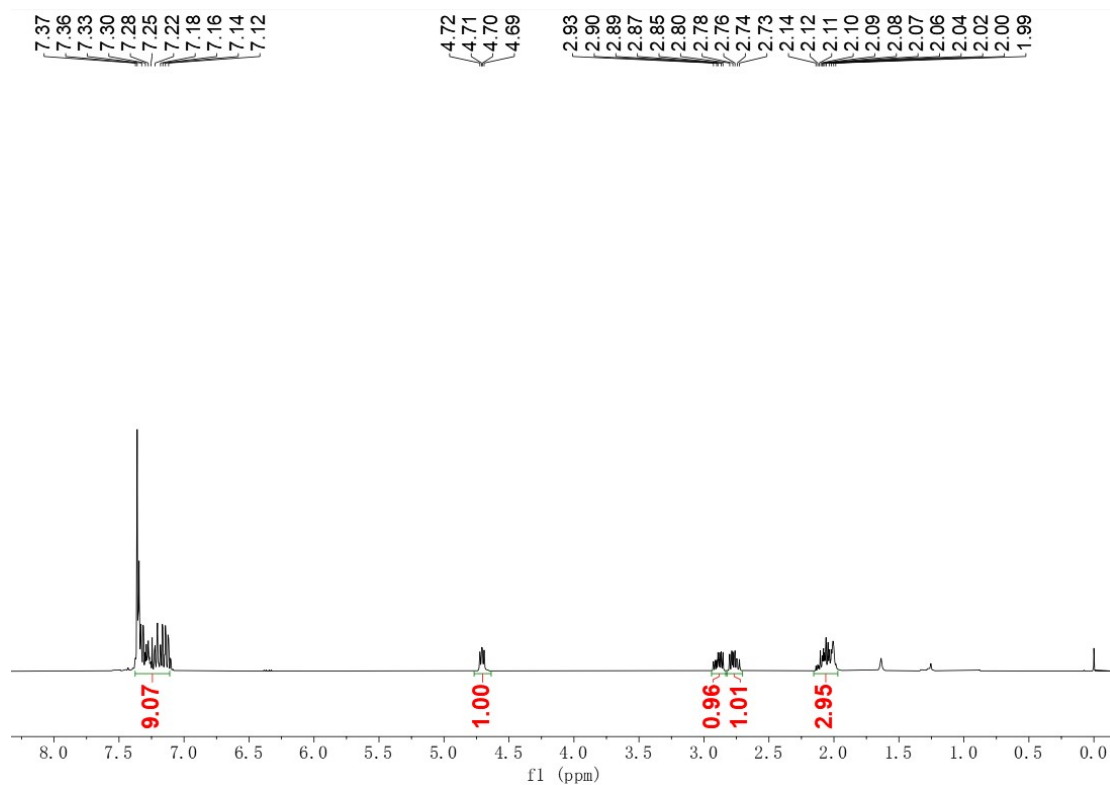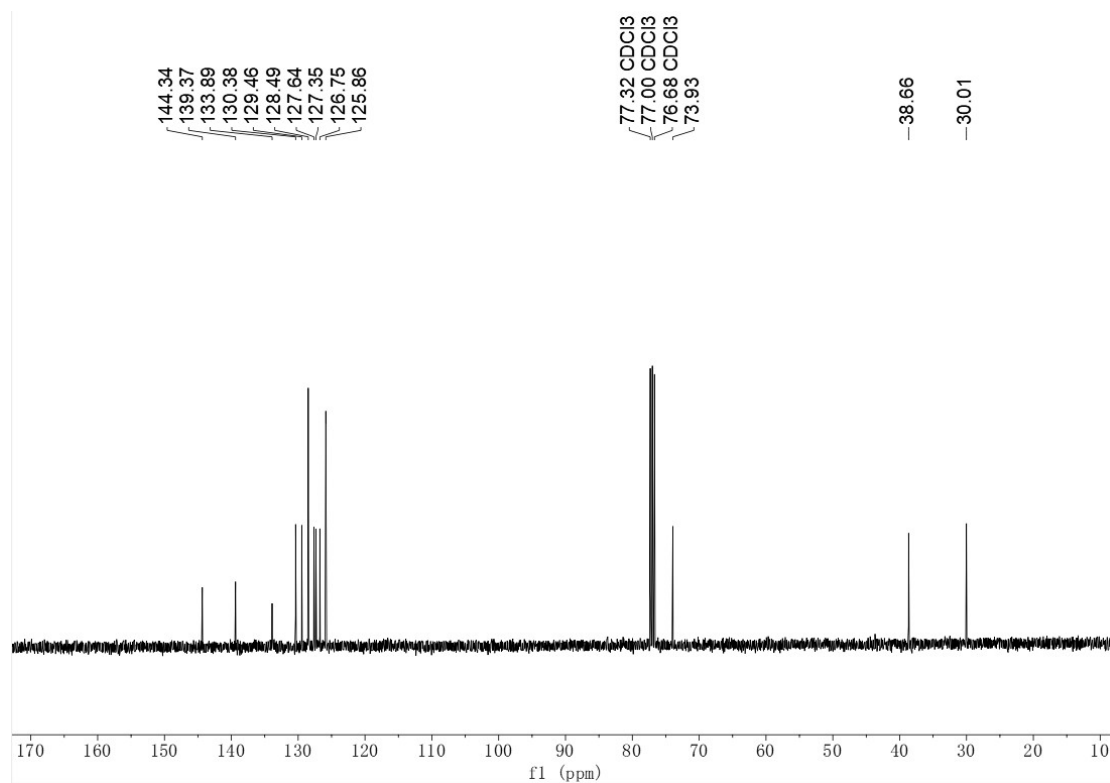



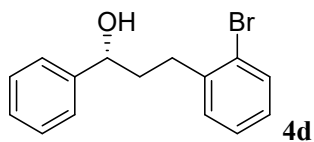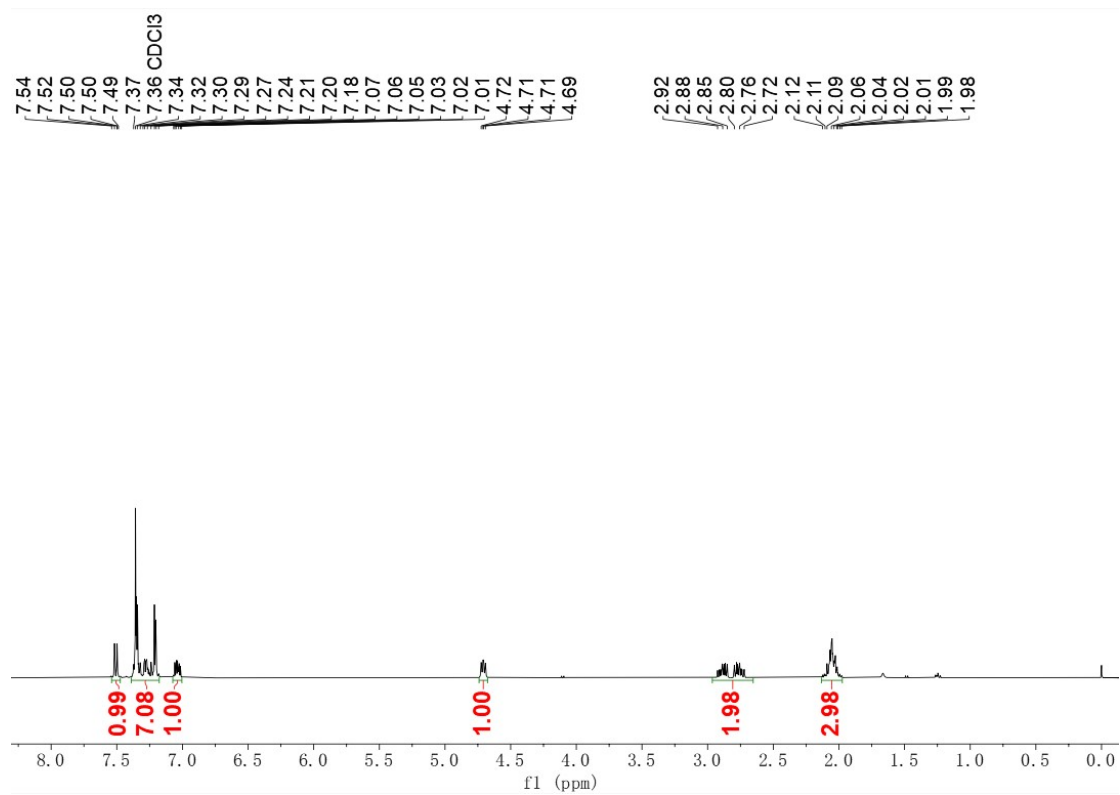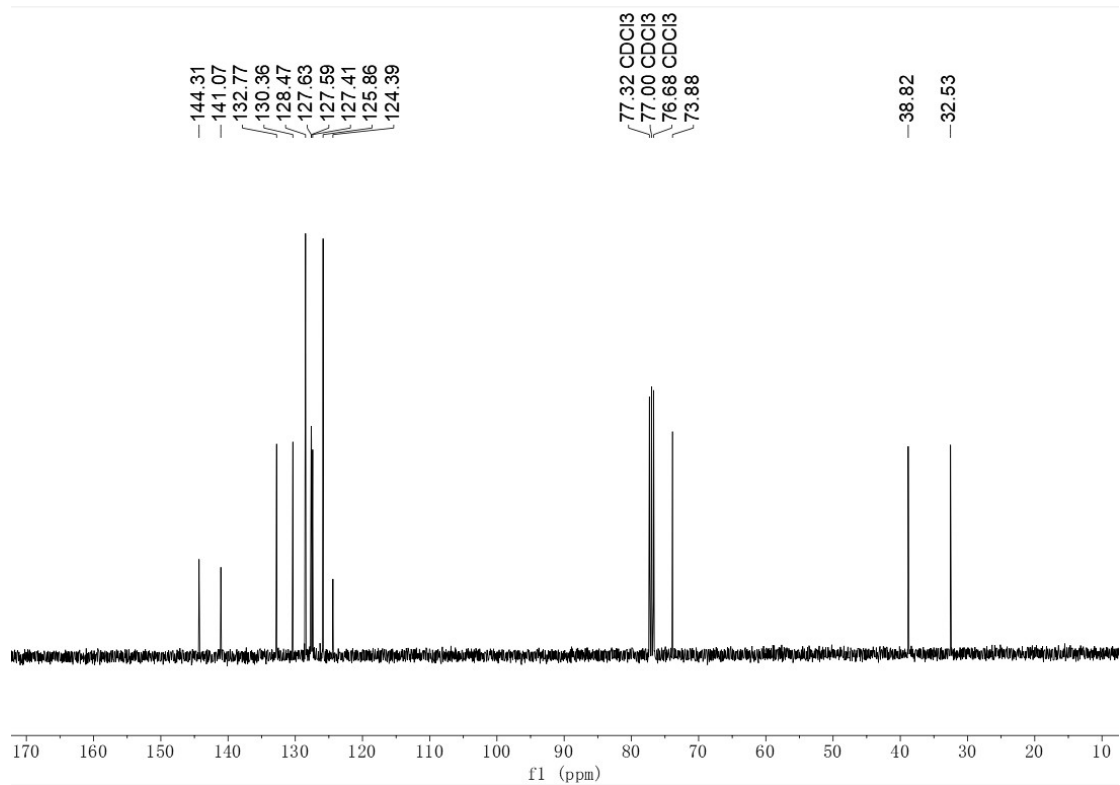

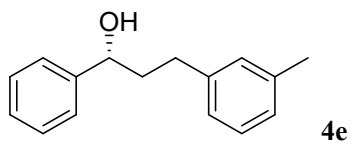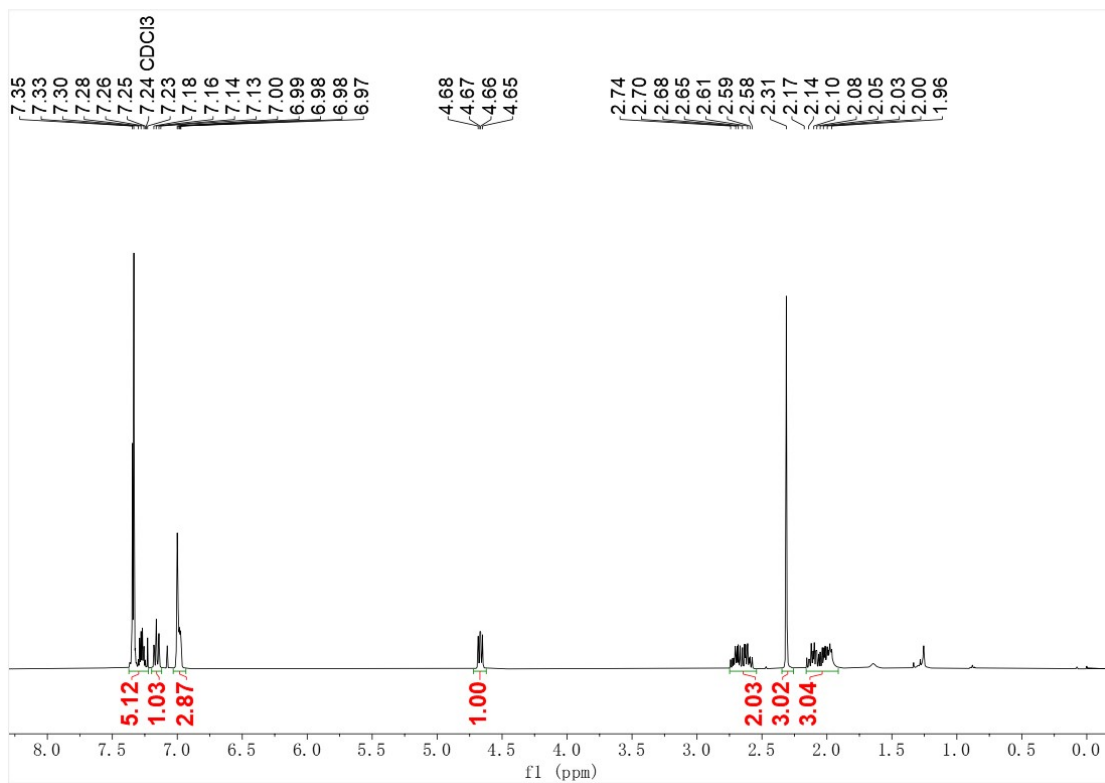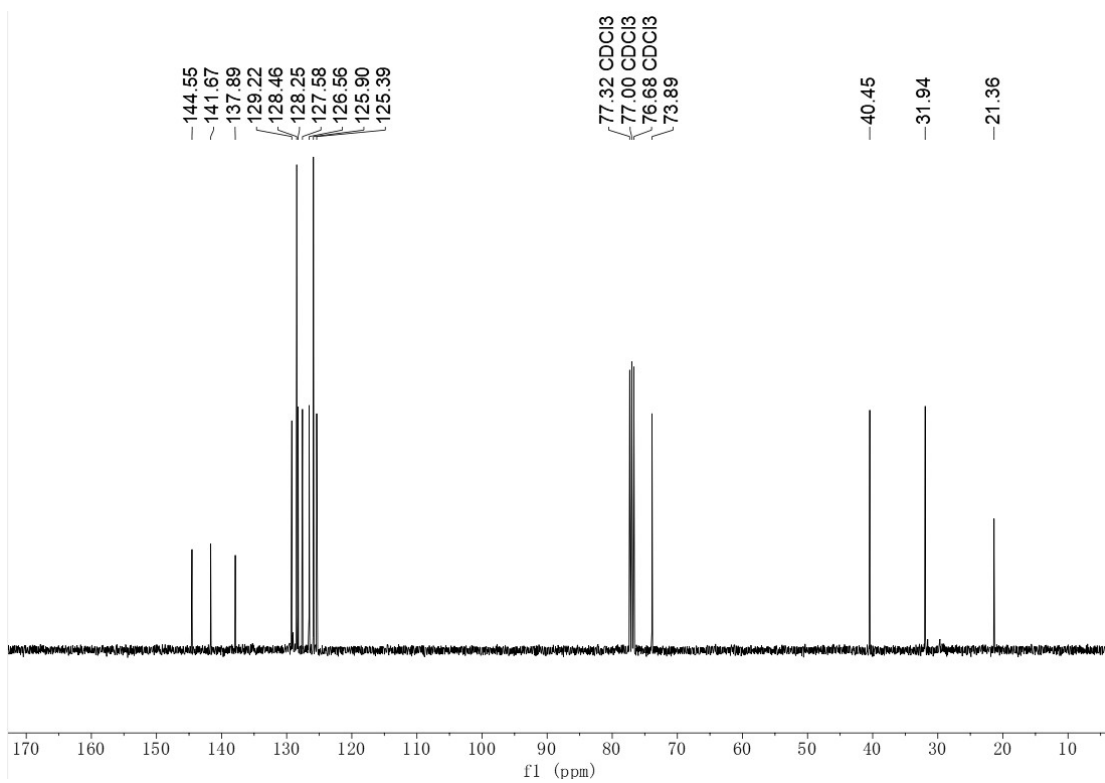

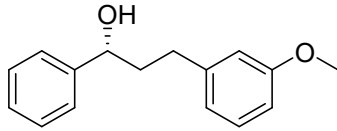

4f

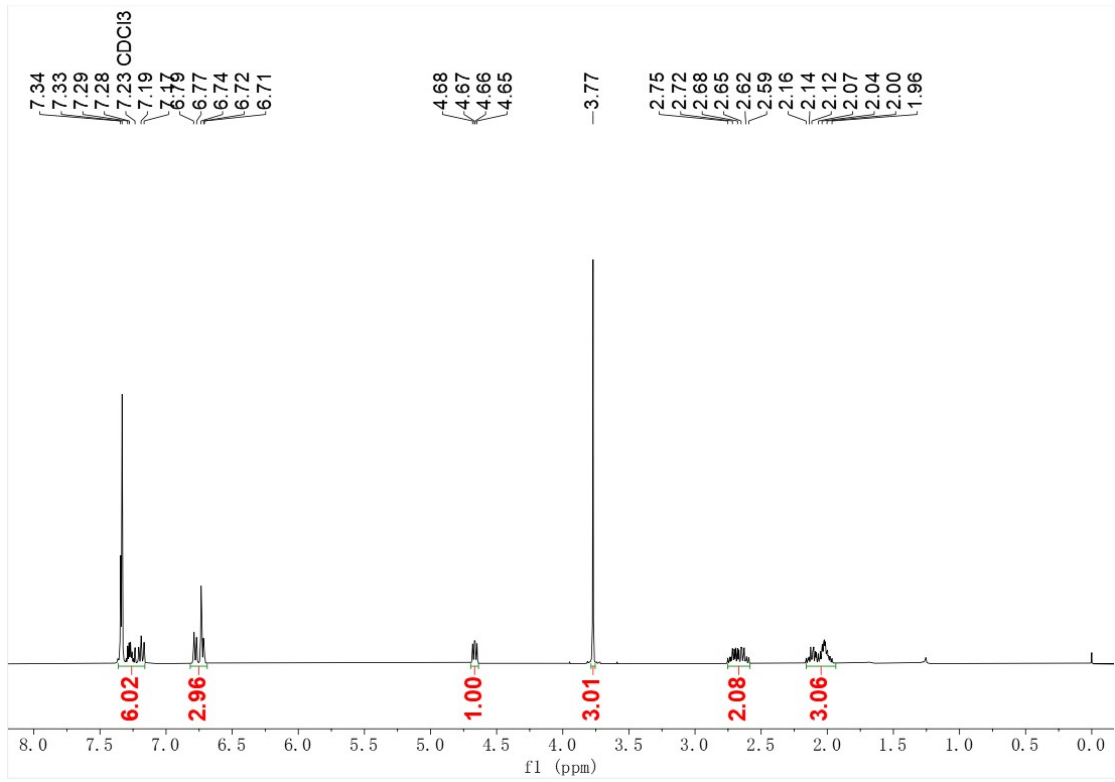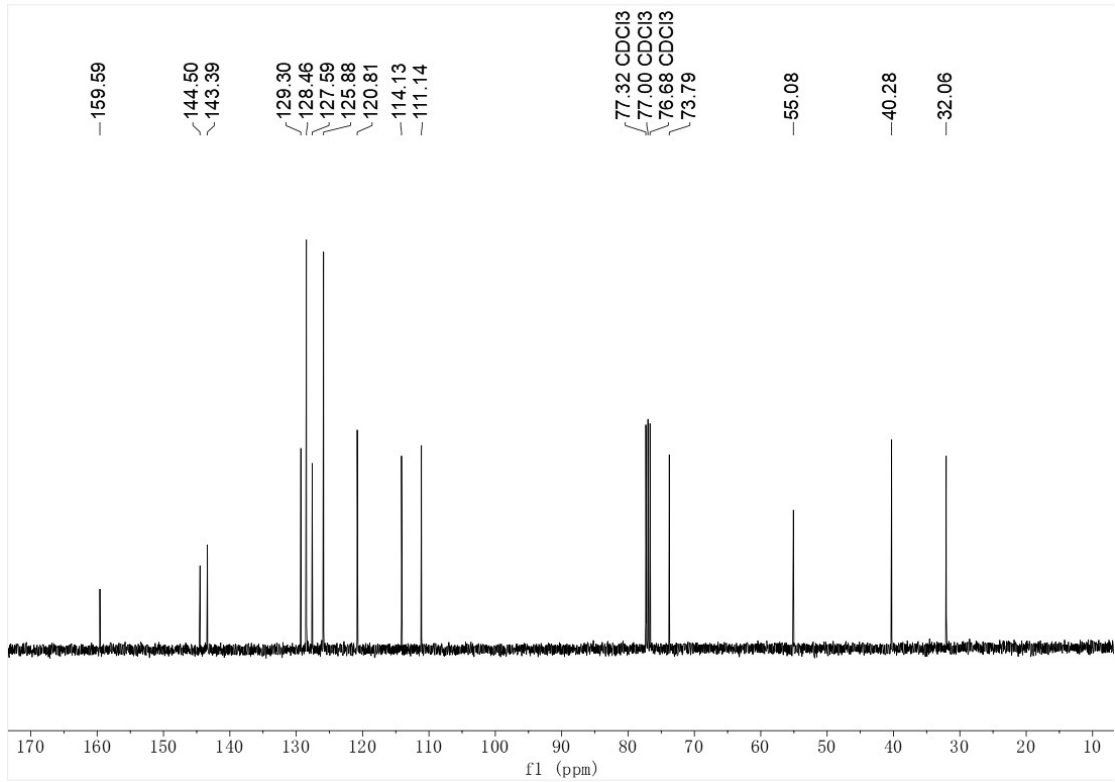

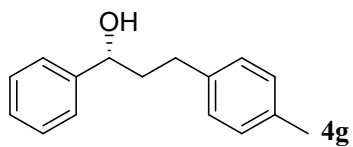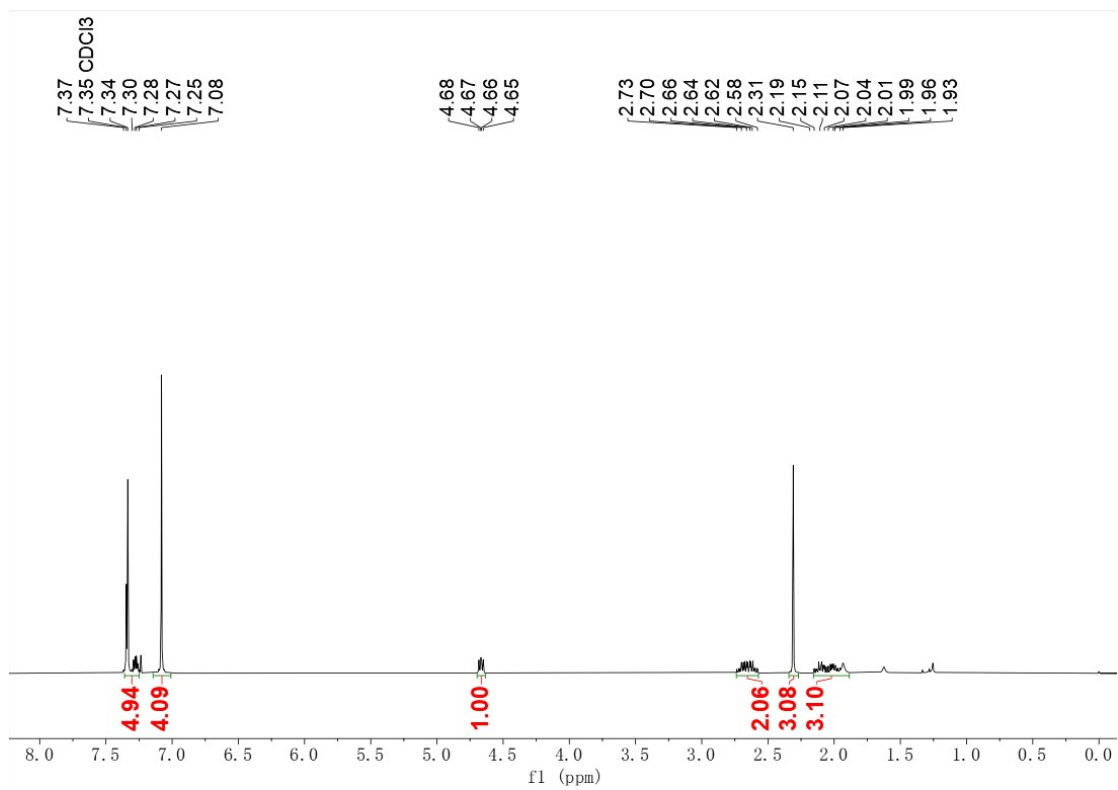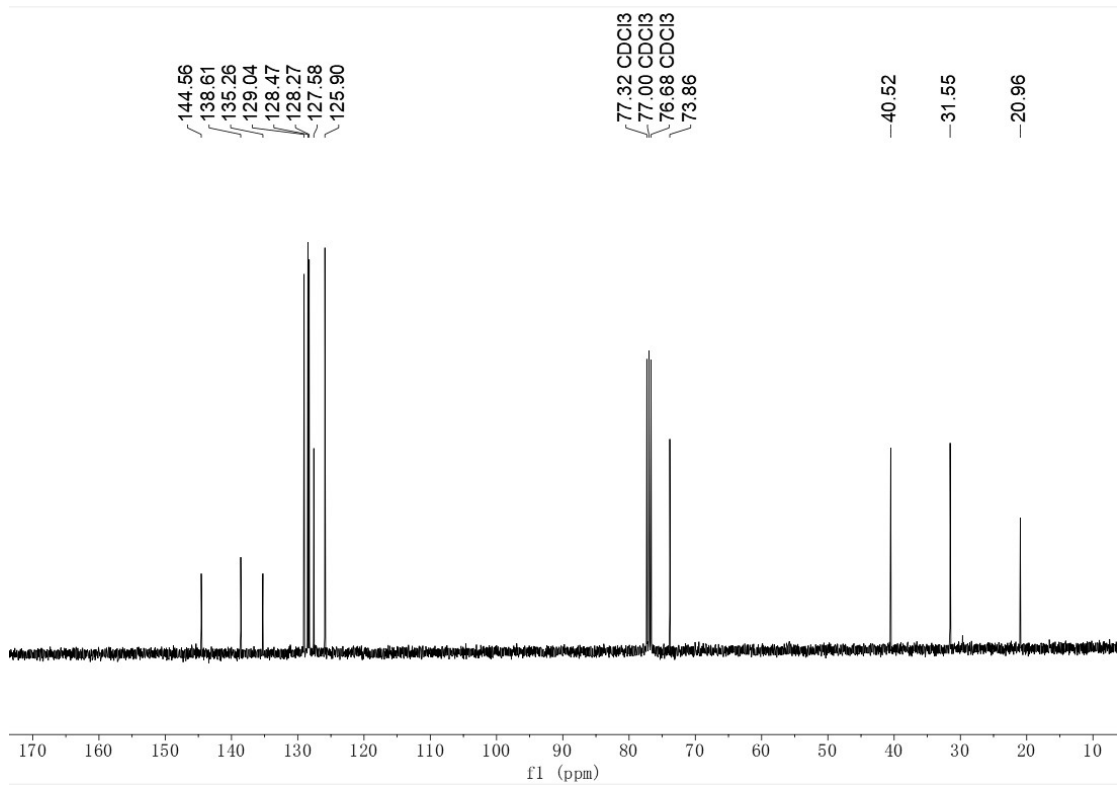

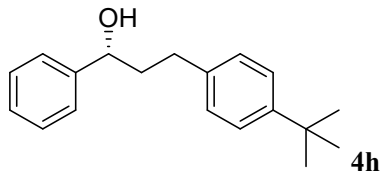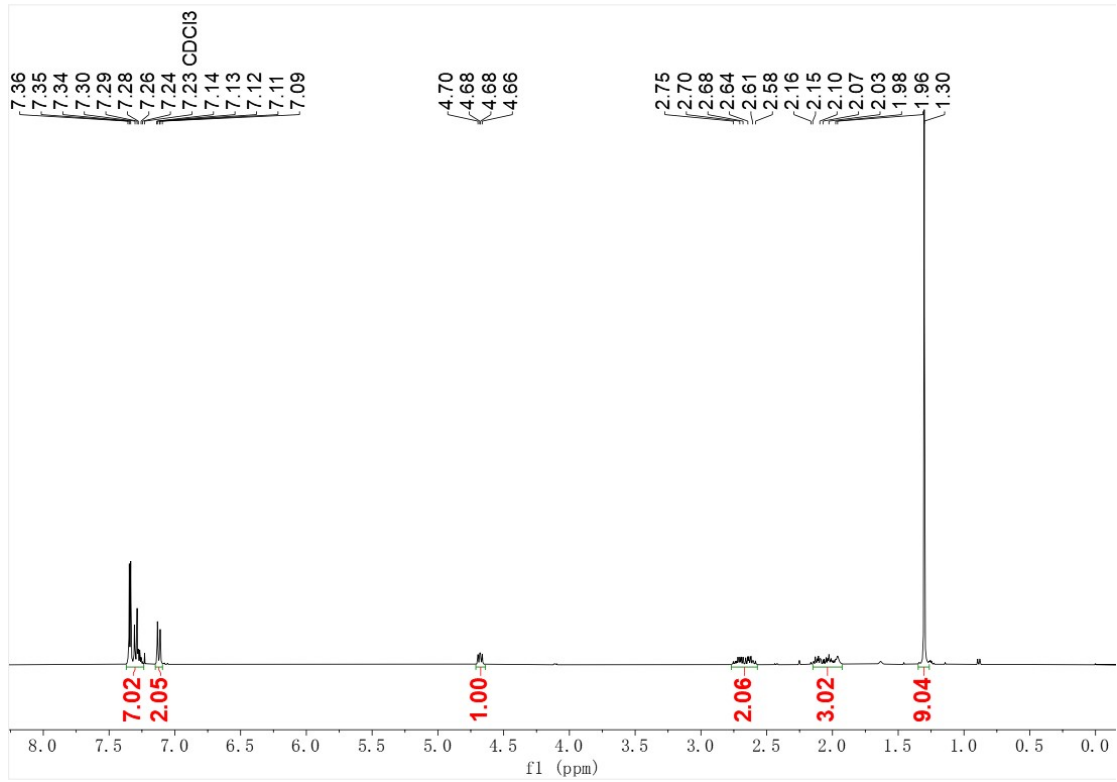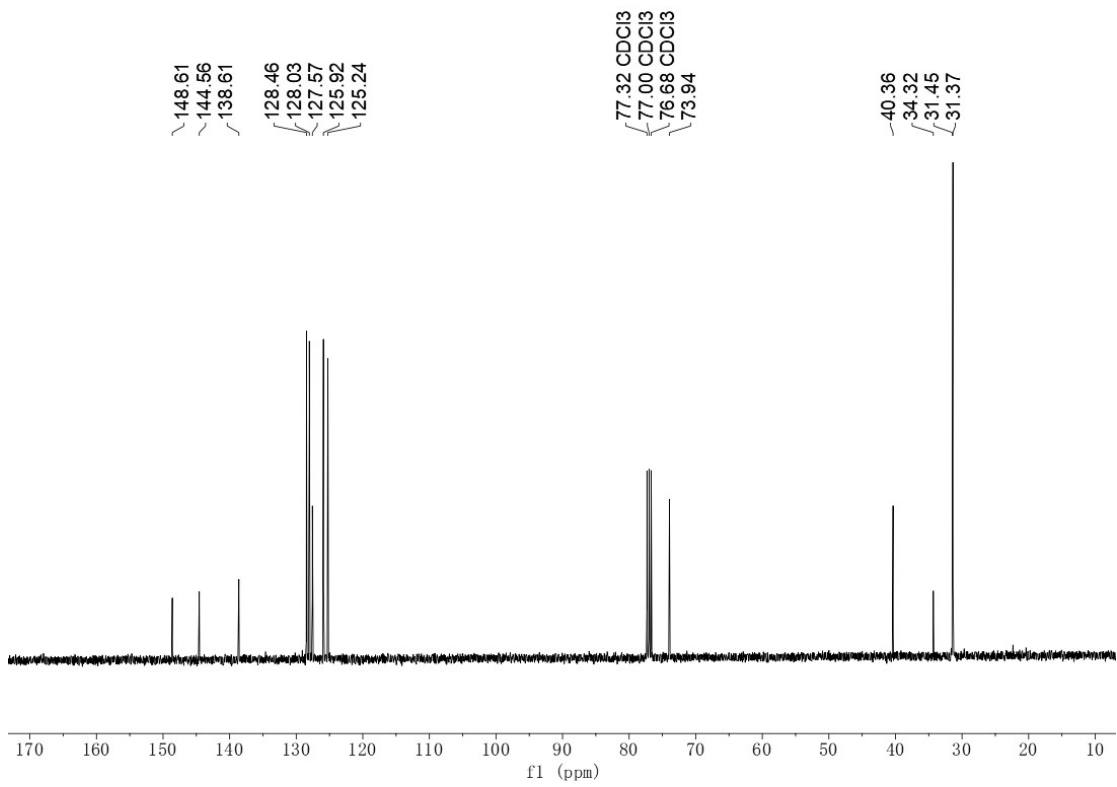

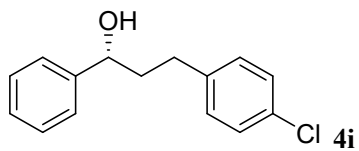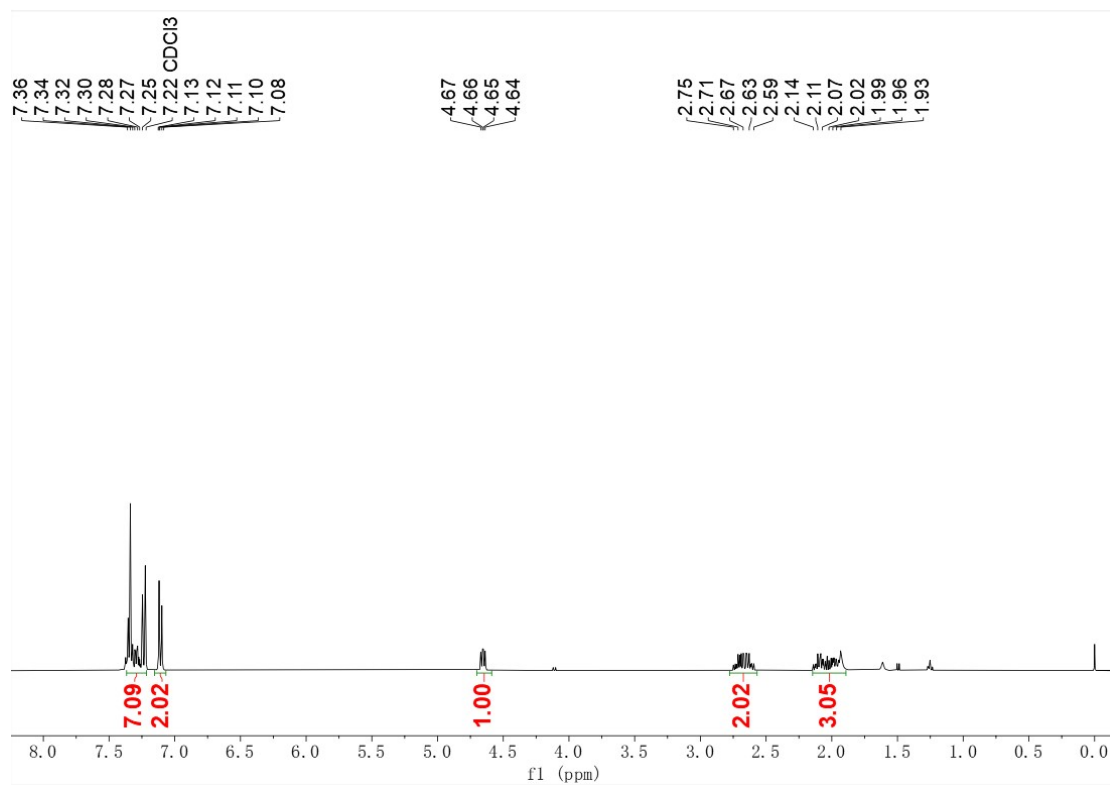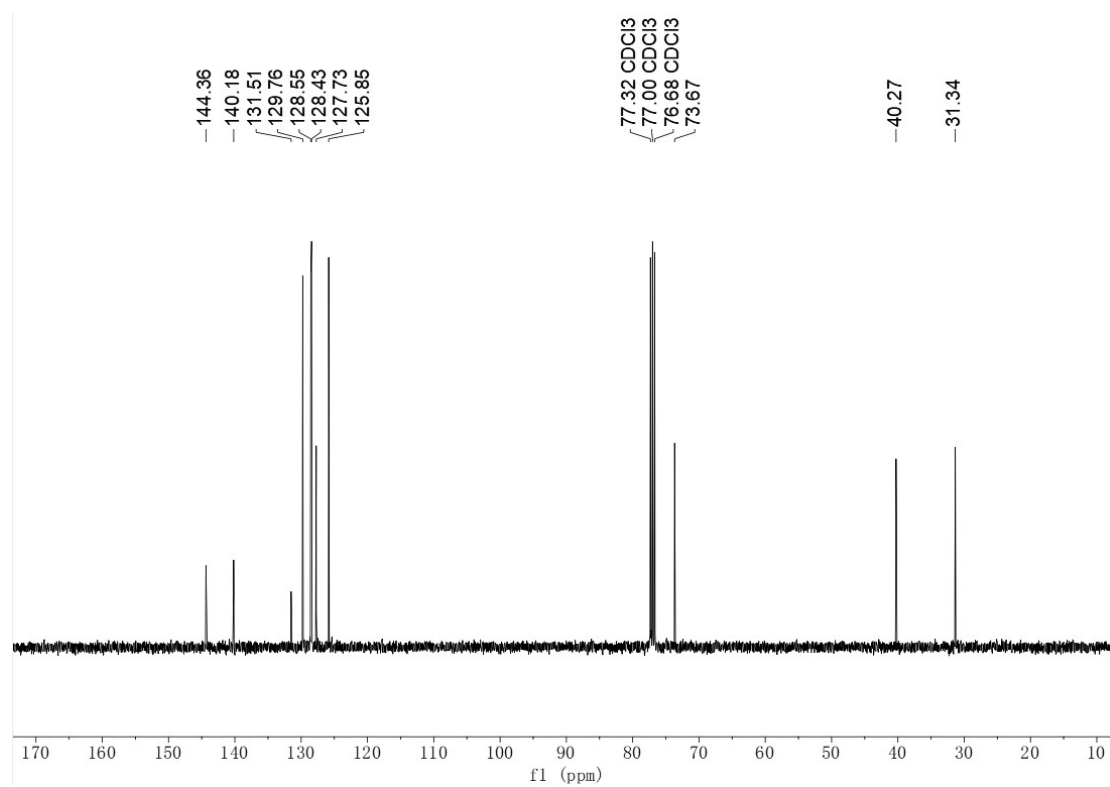

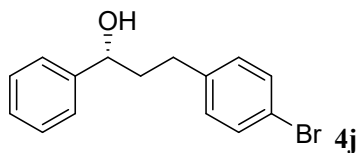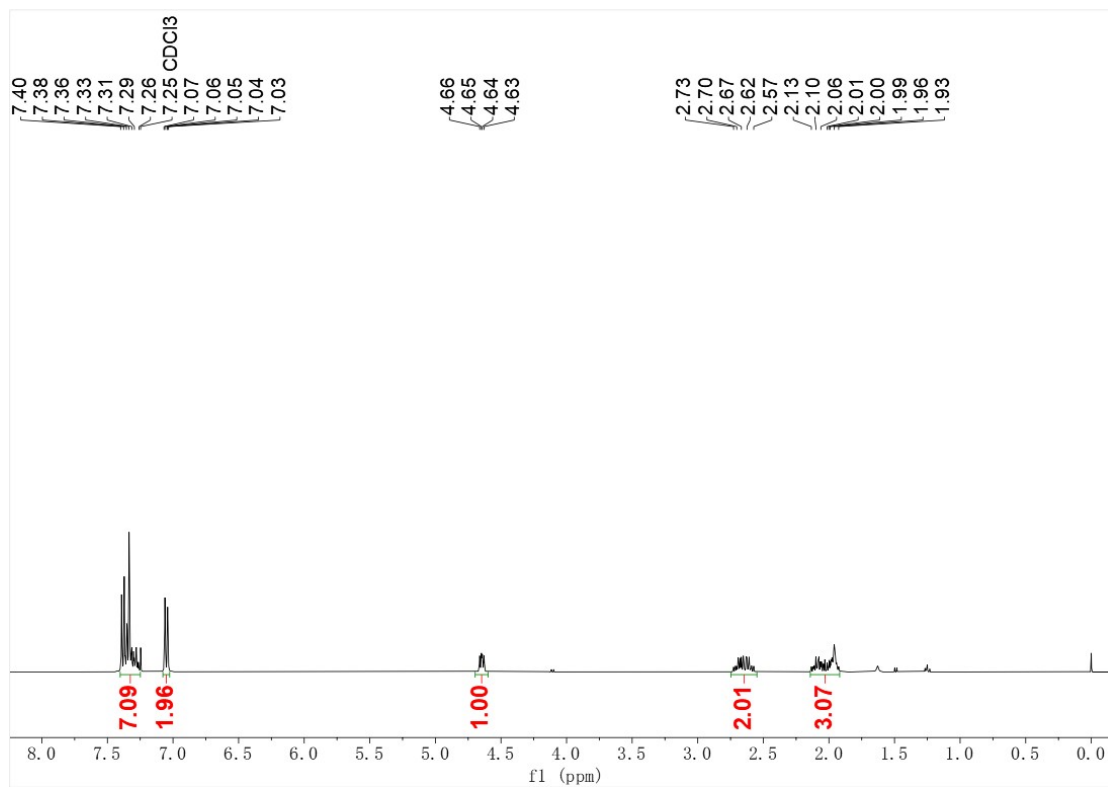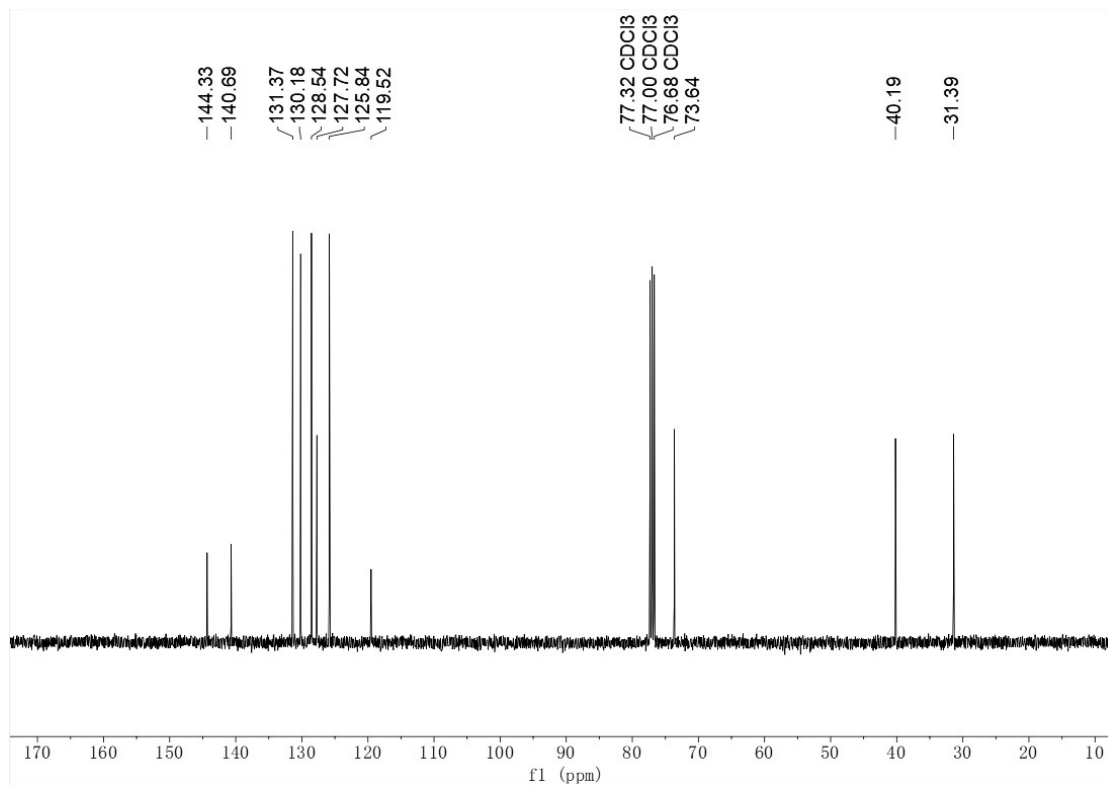

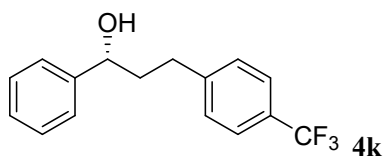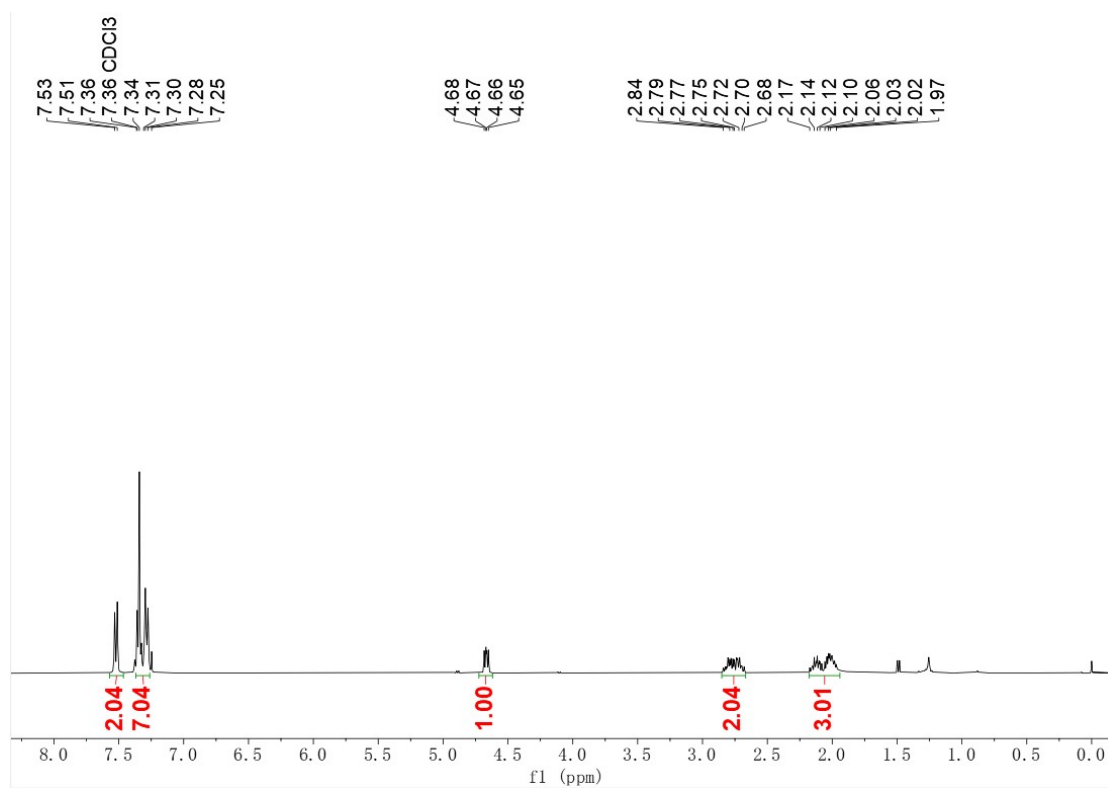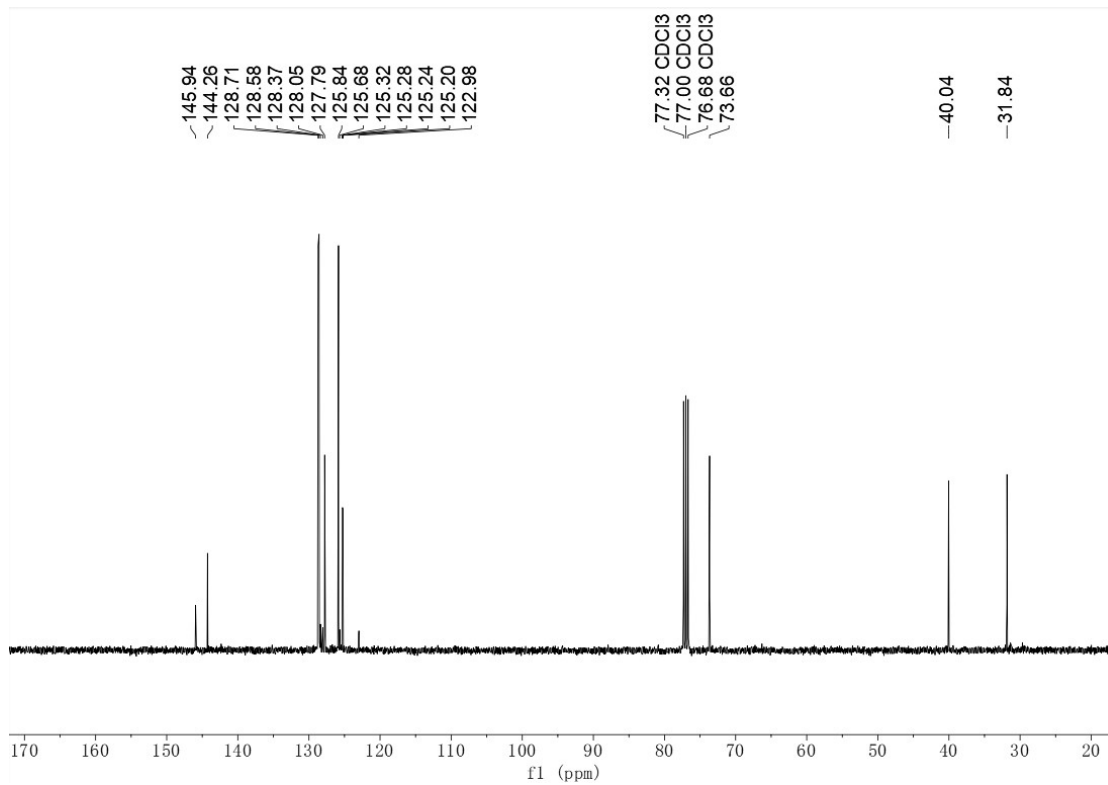



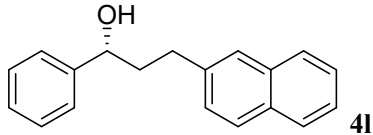

41

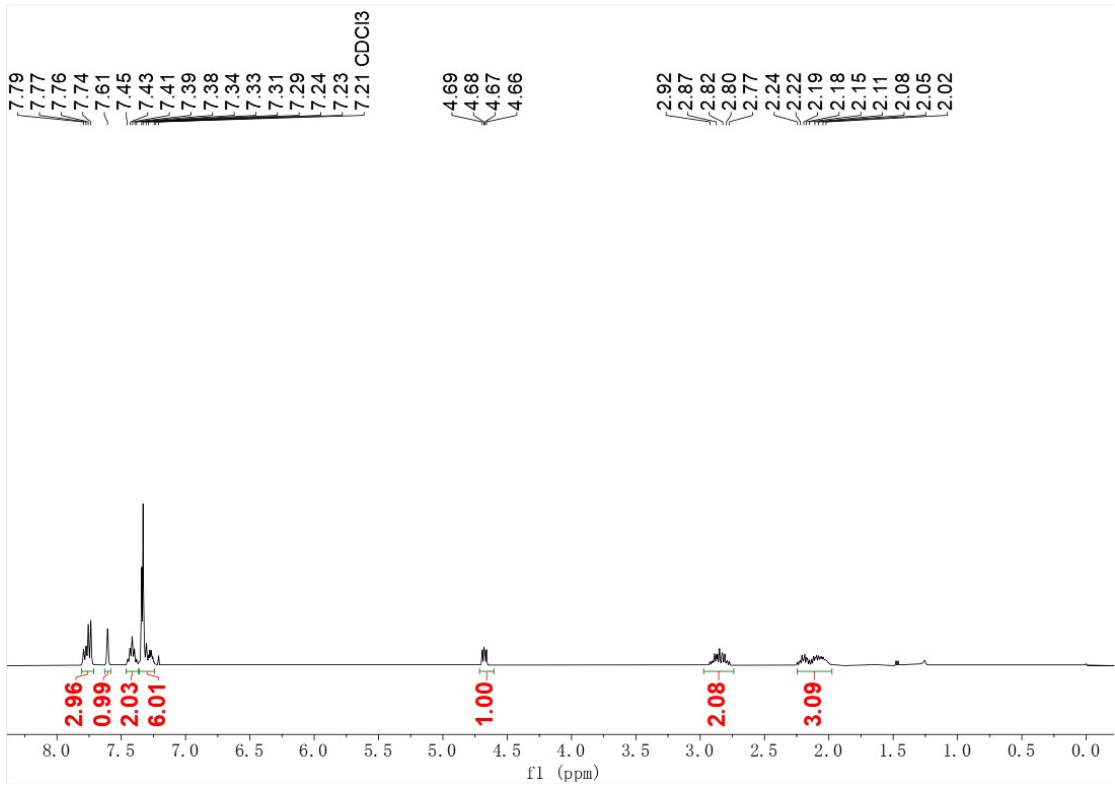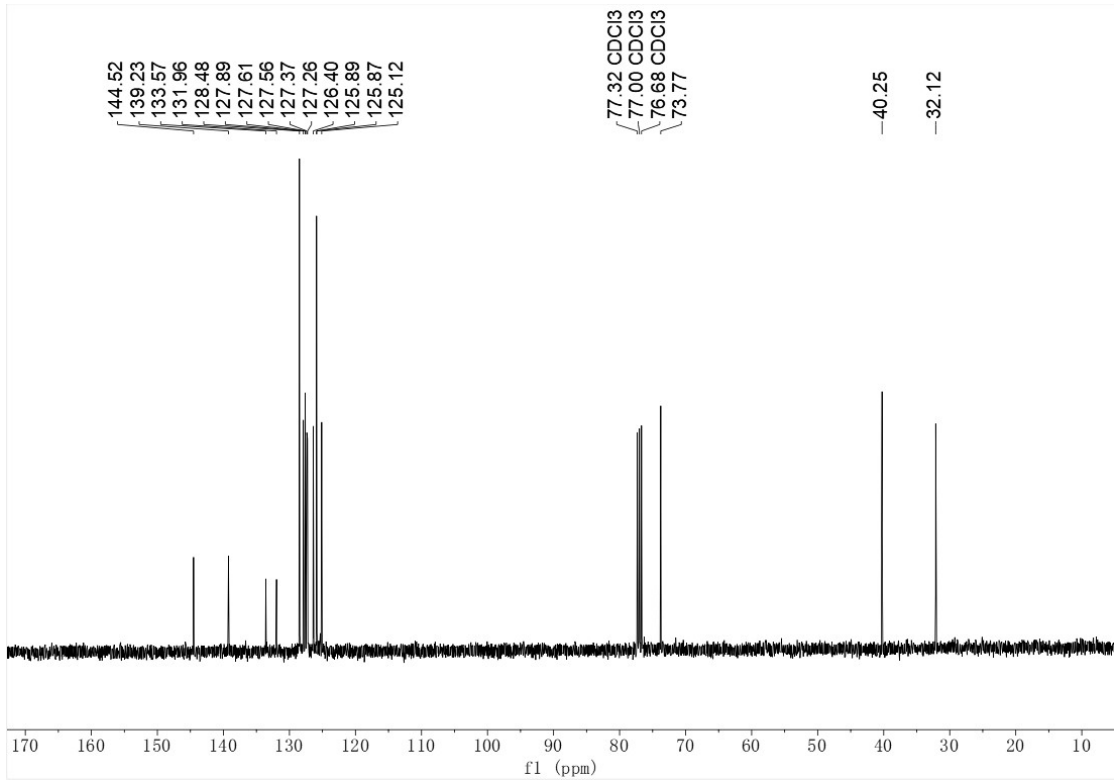

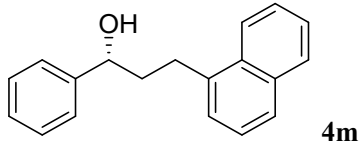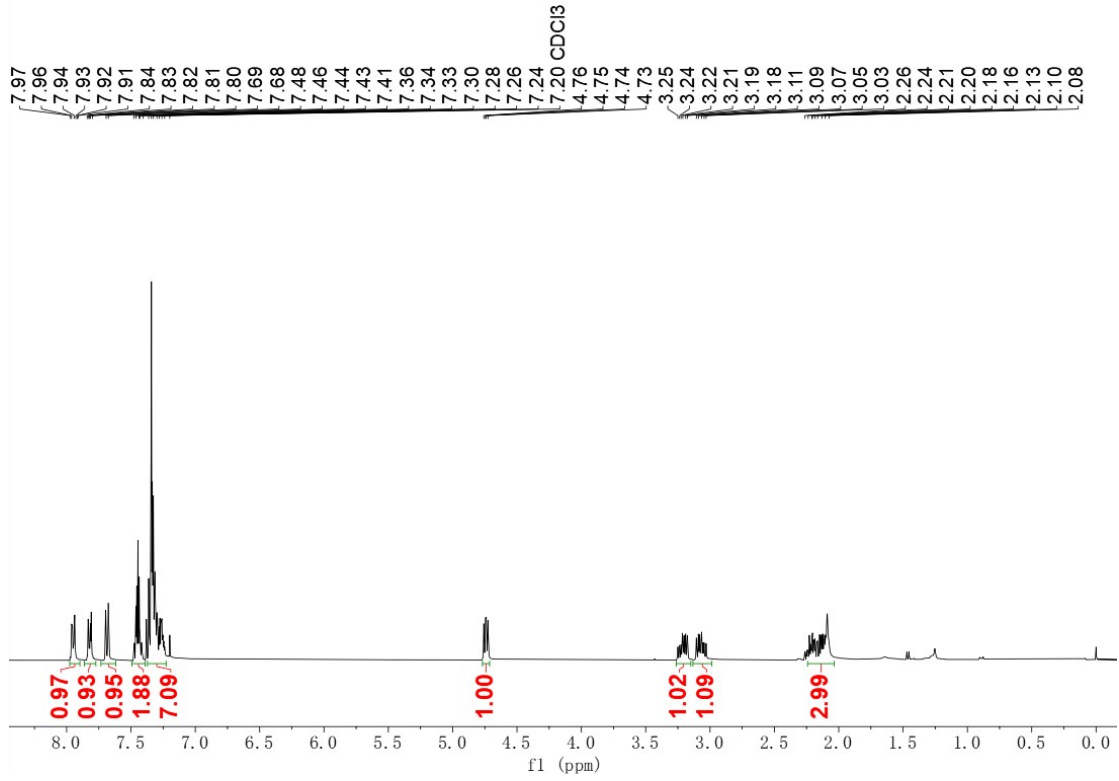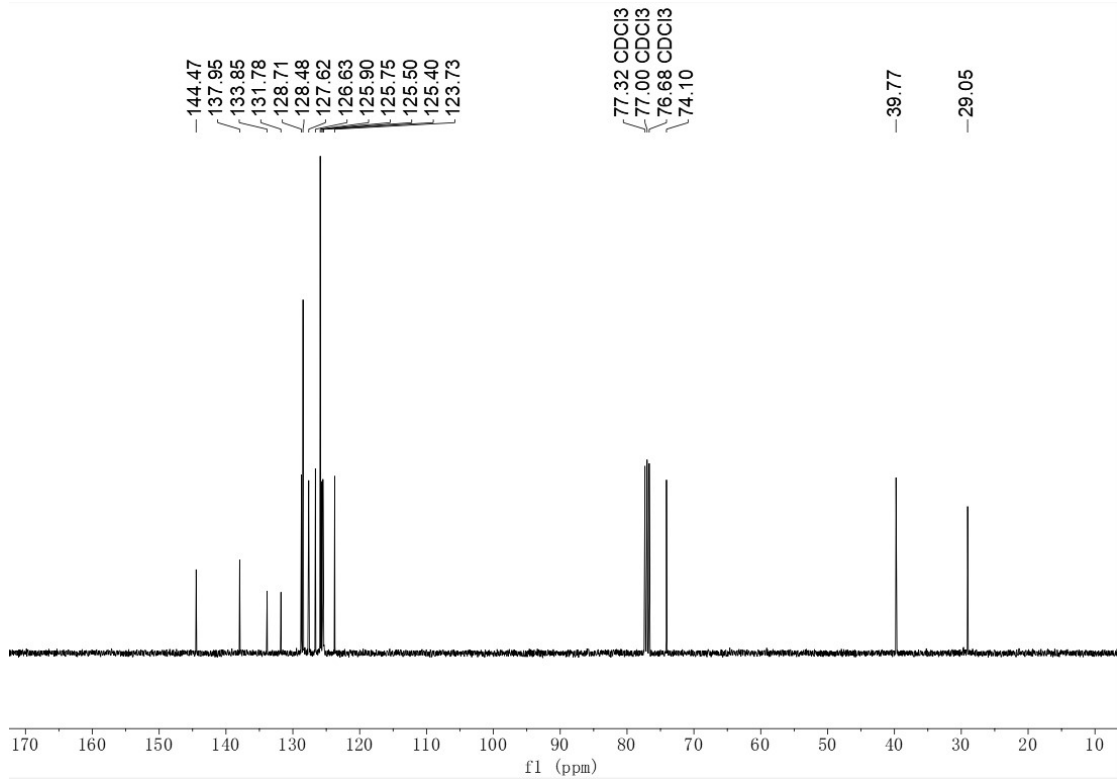

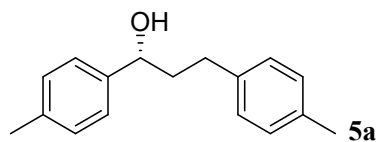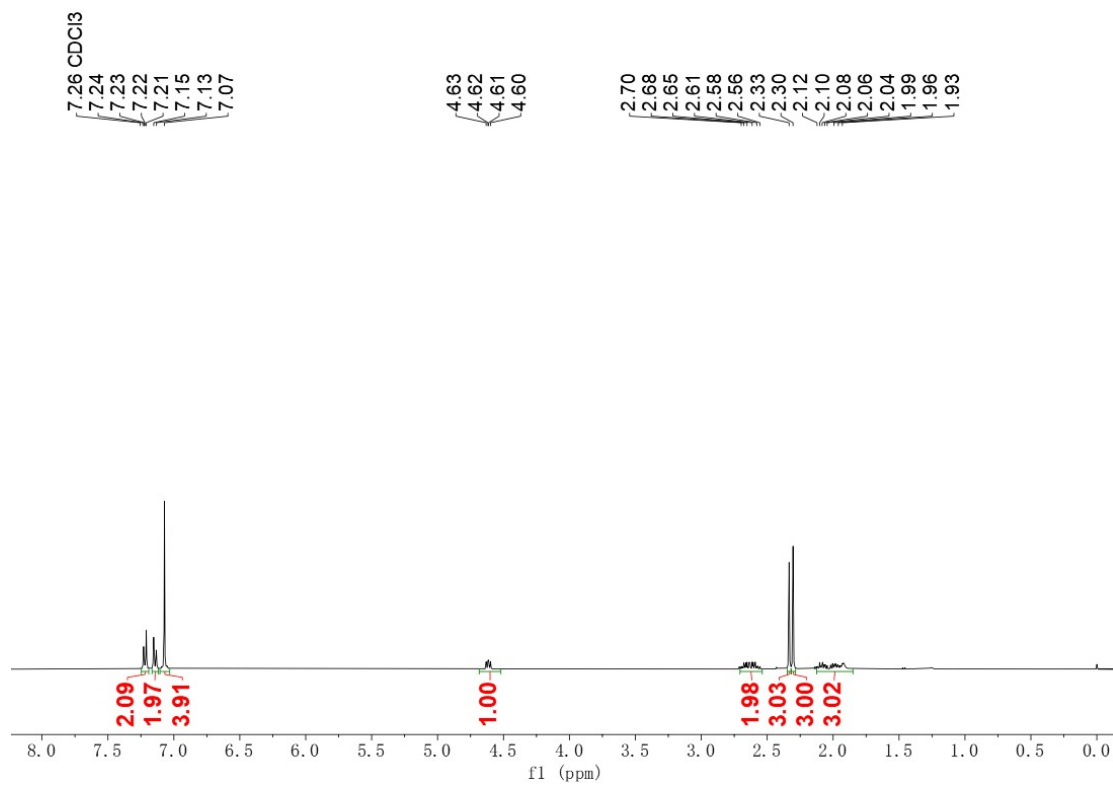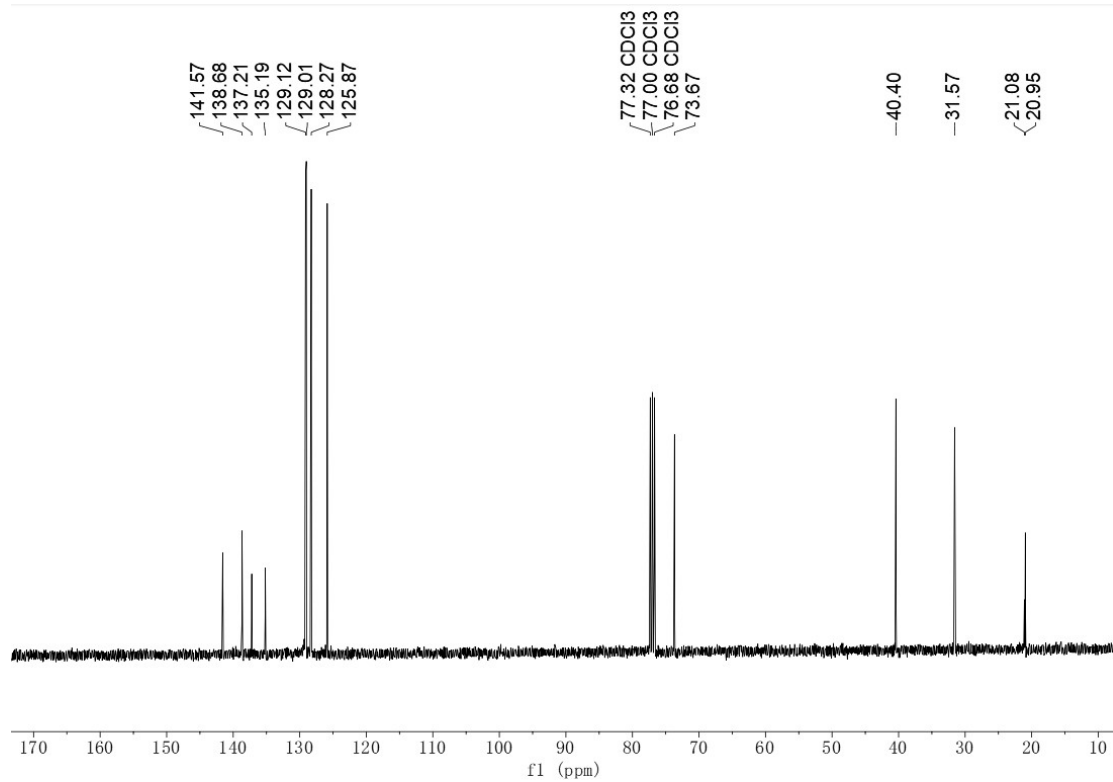

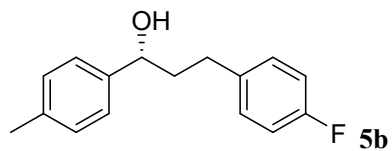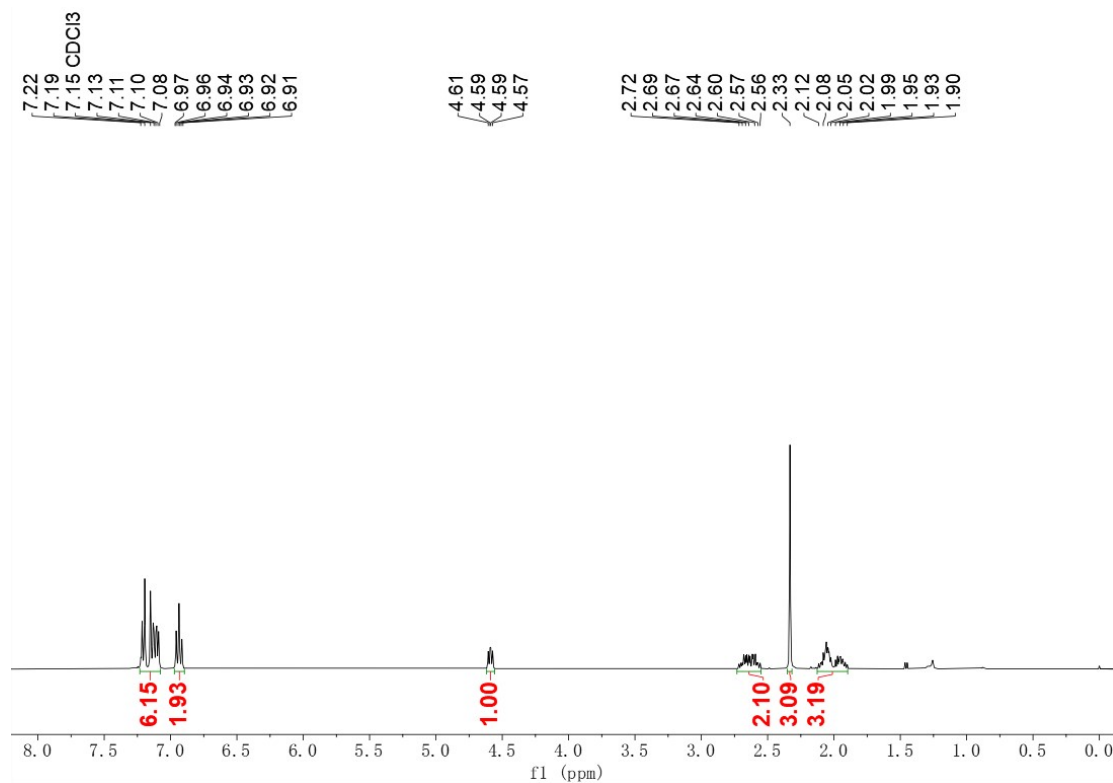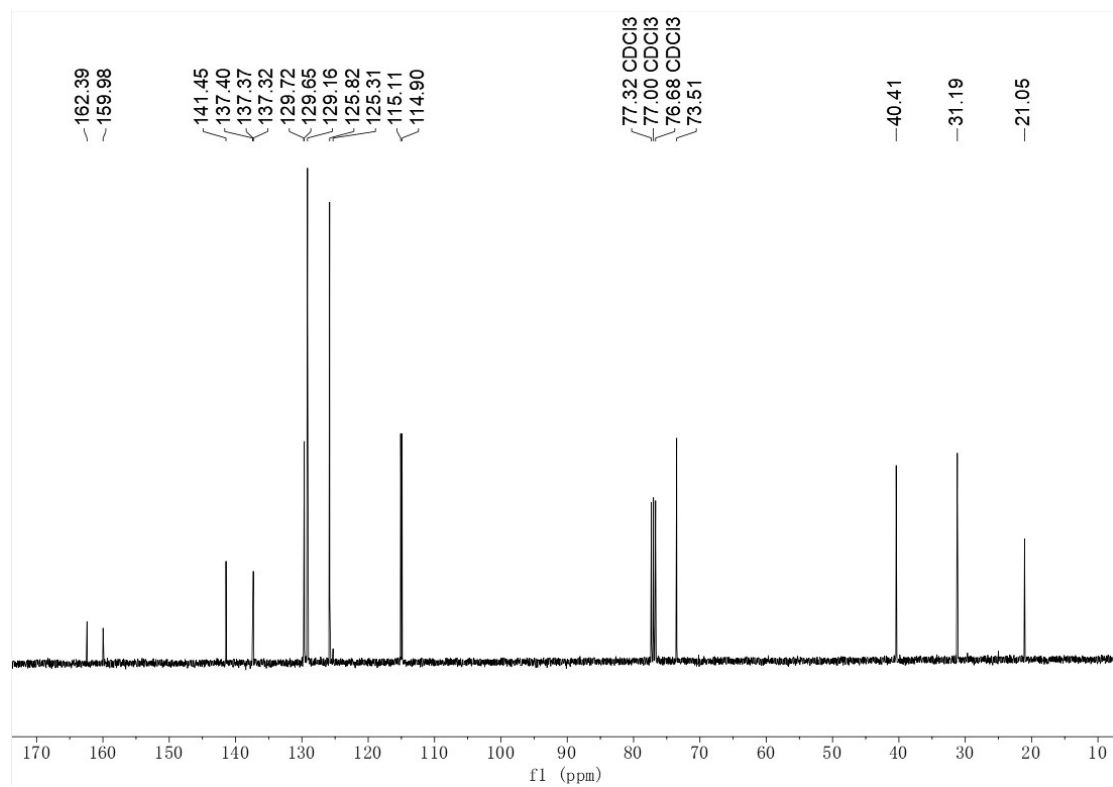

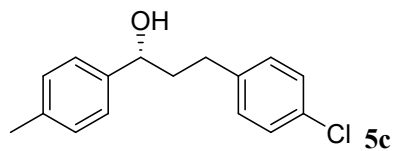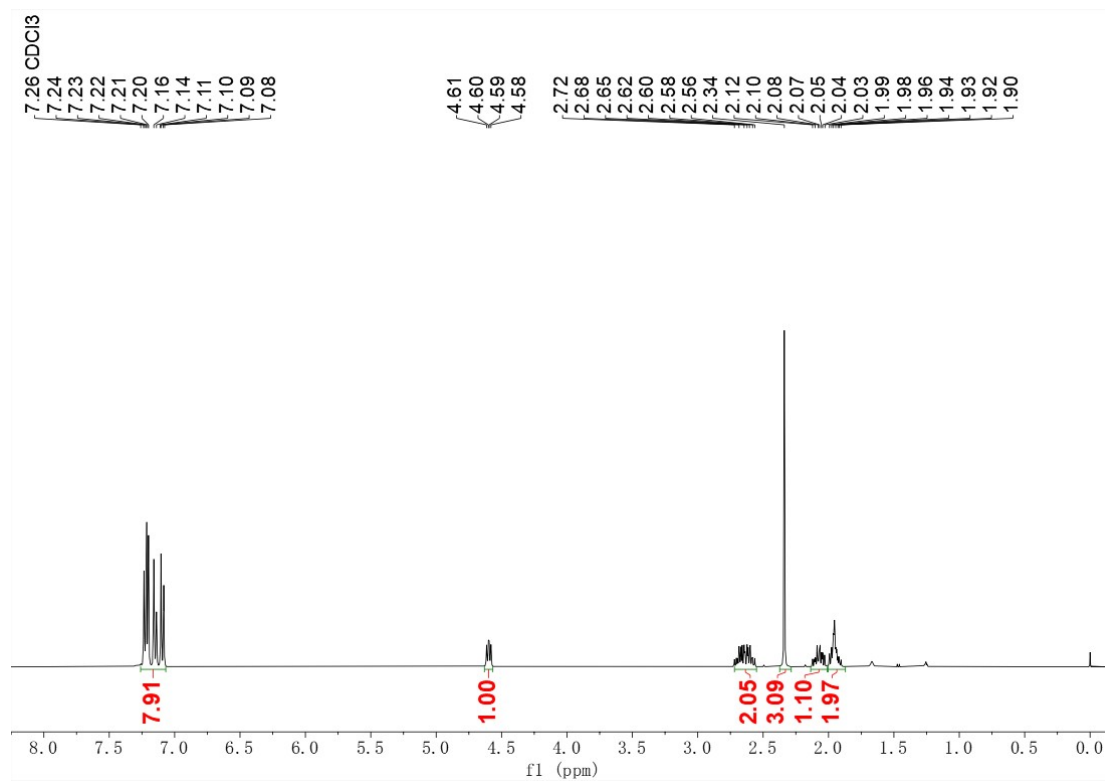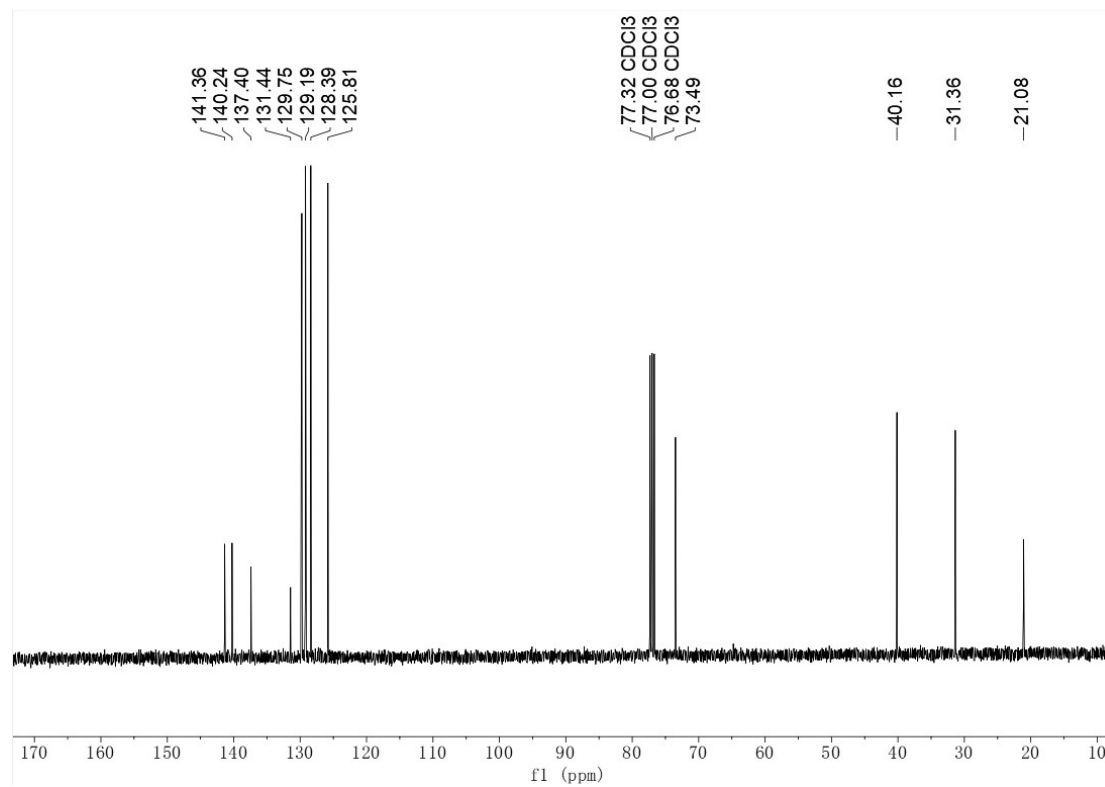

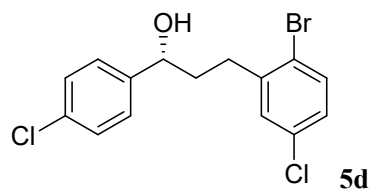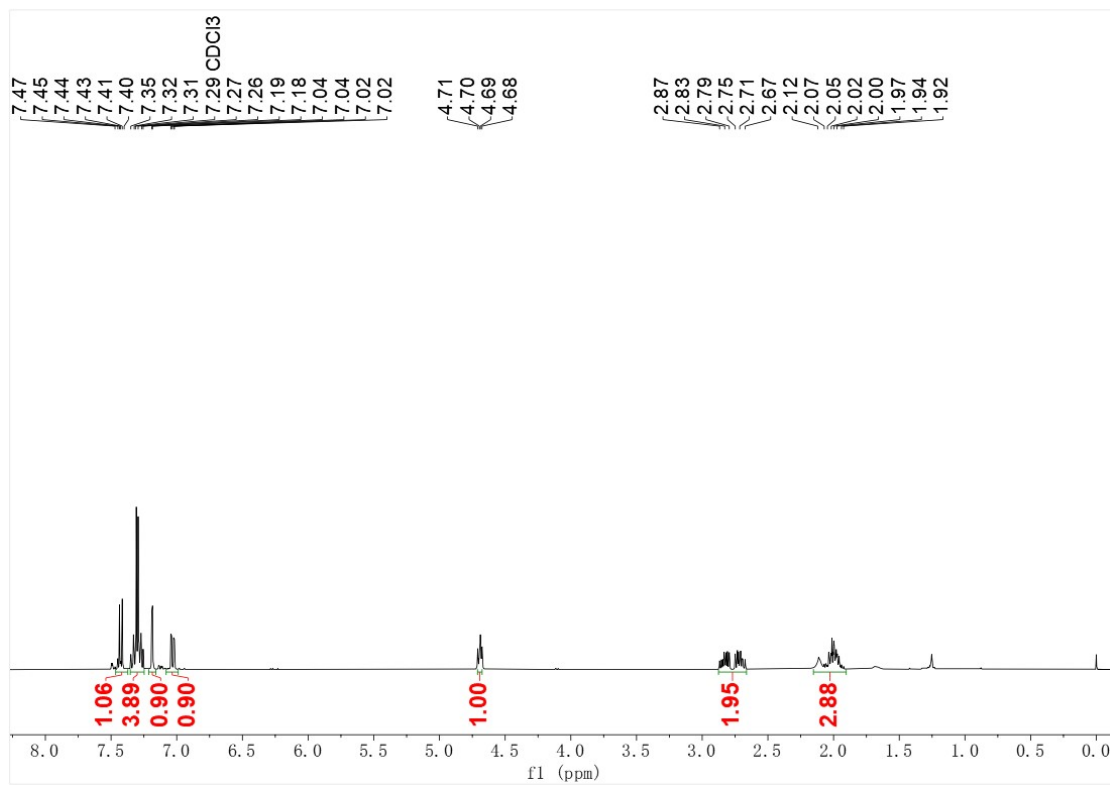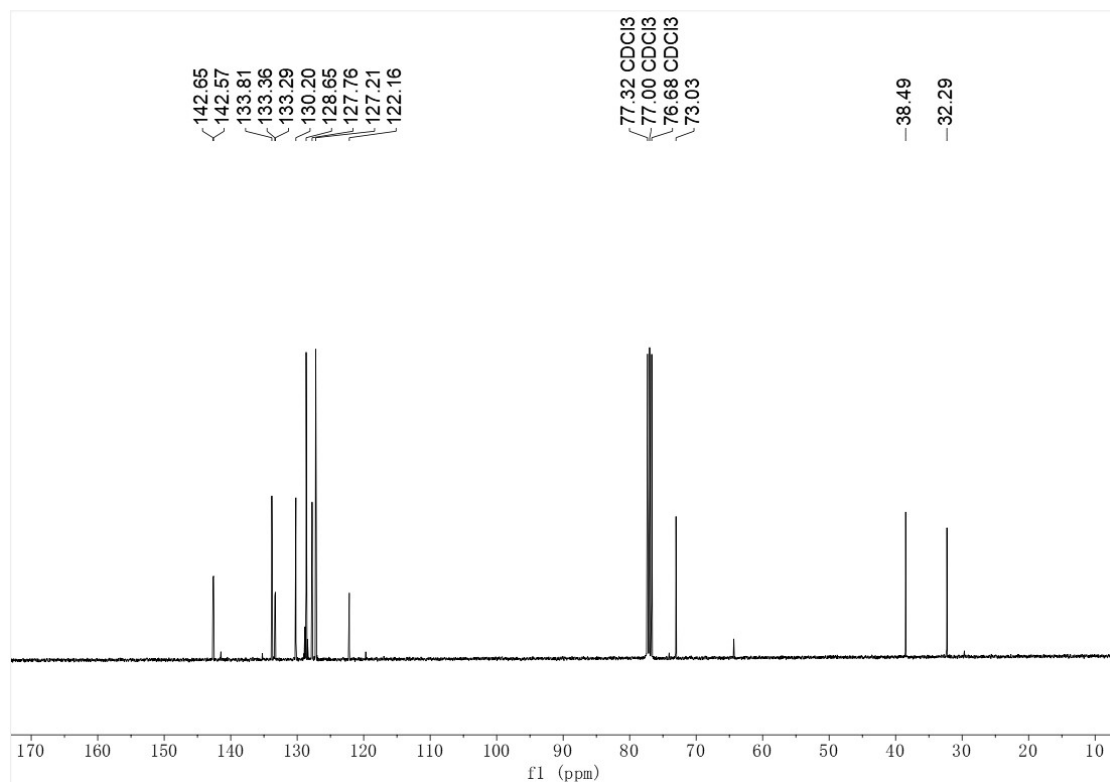

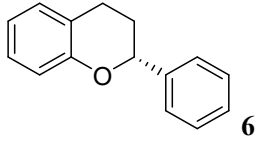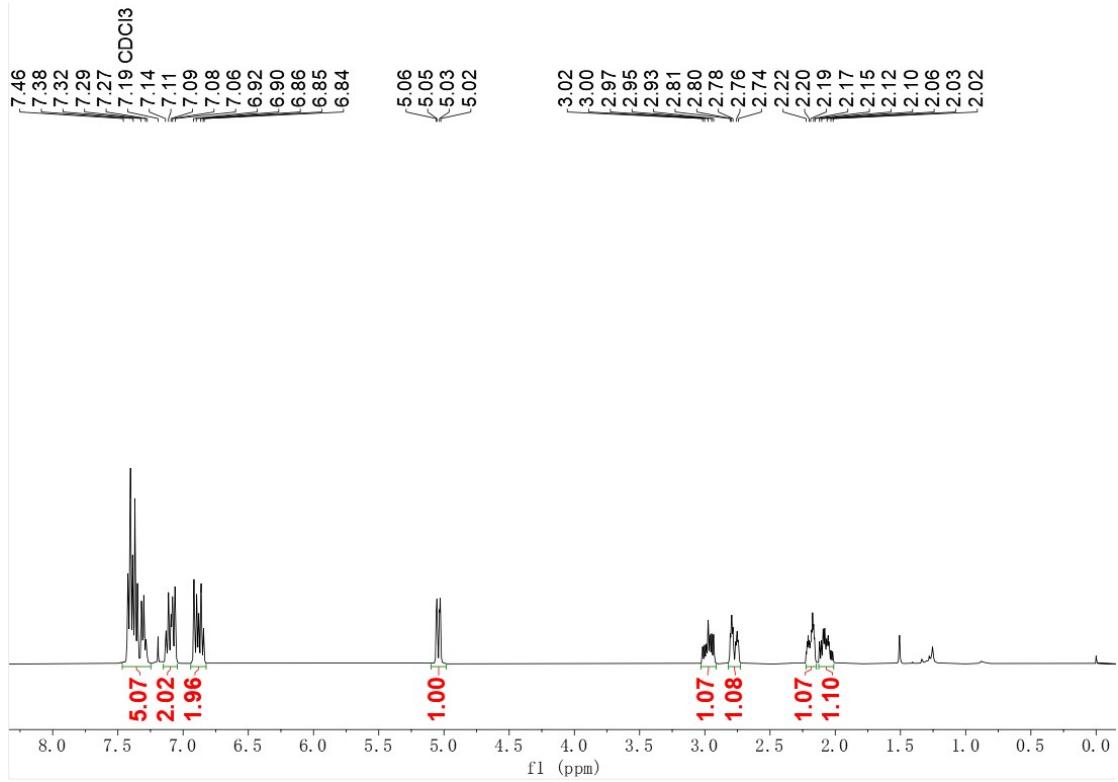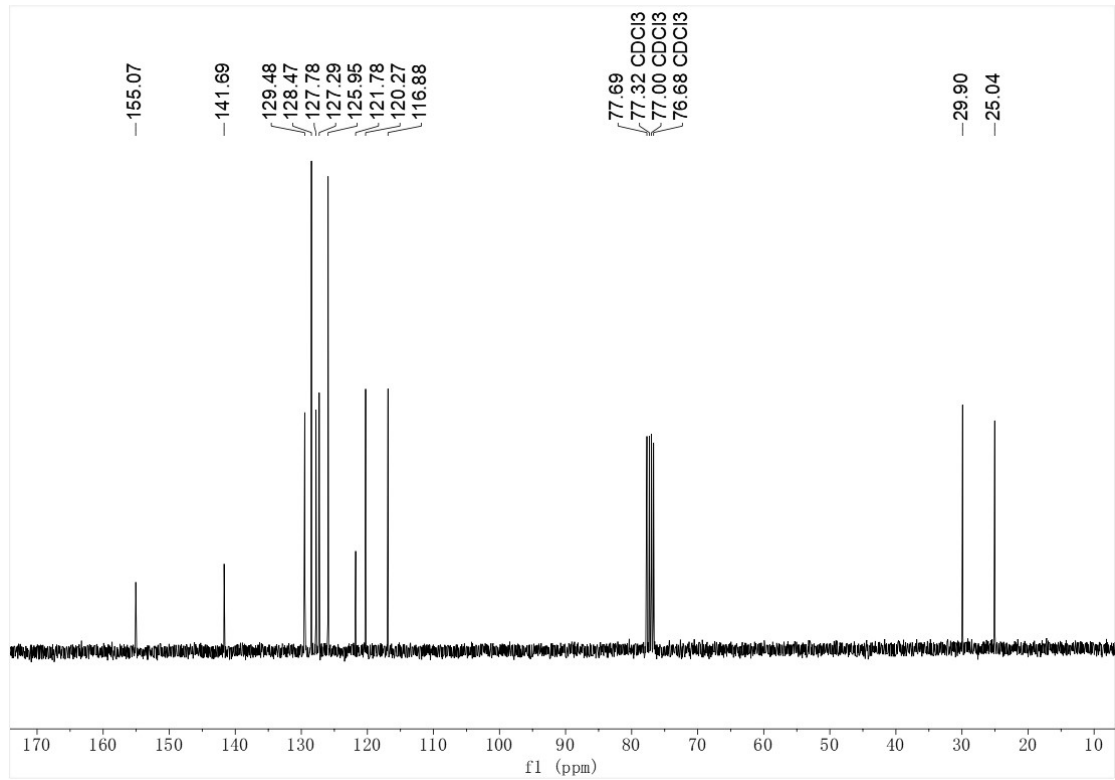

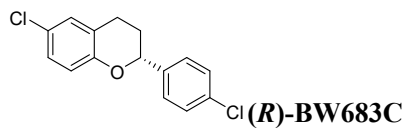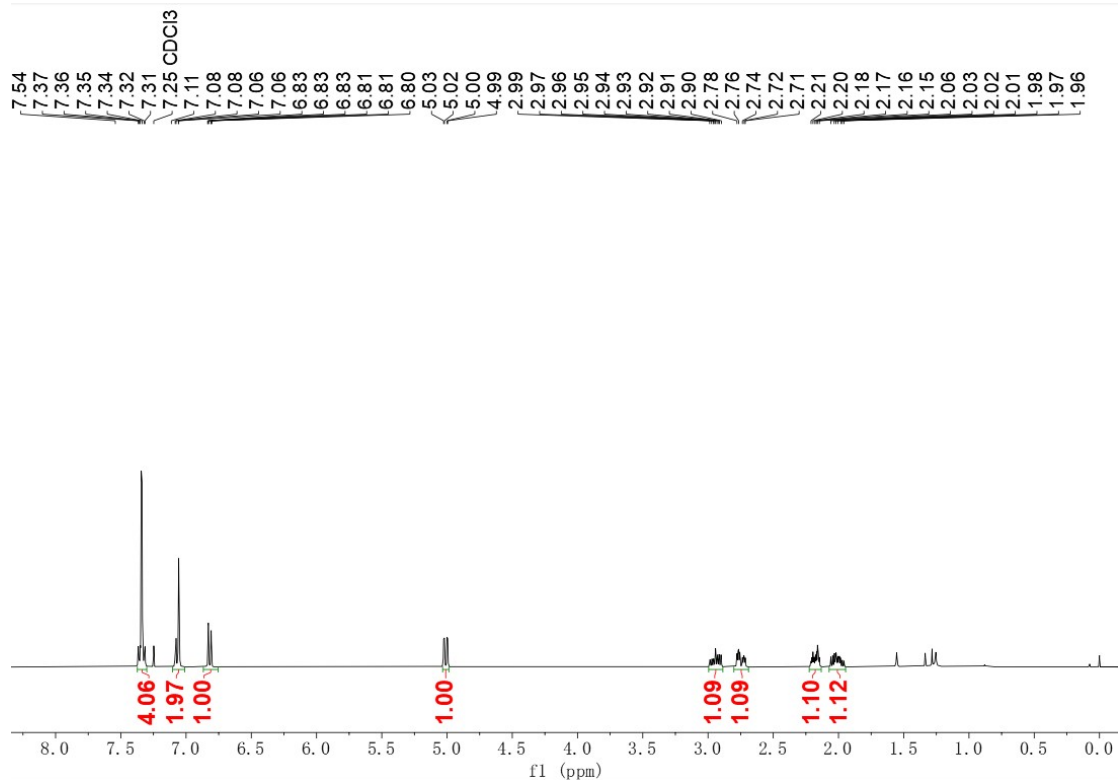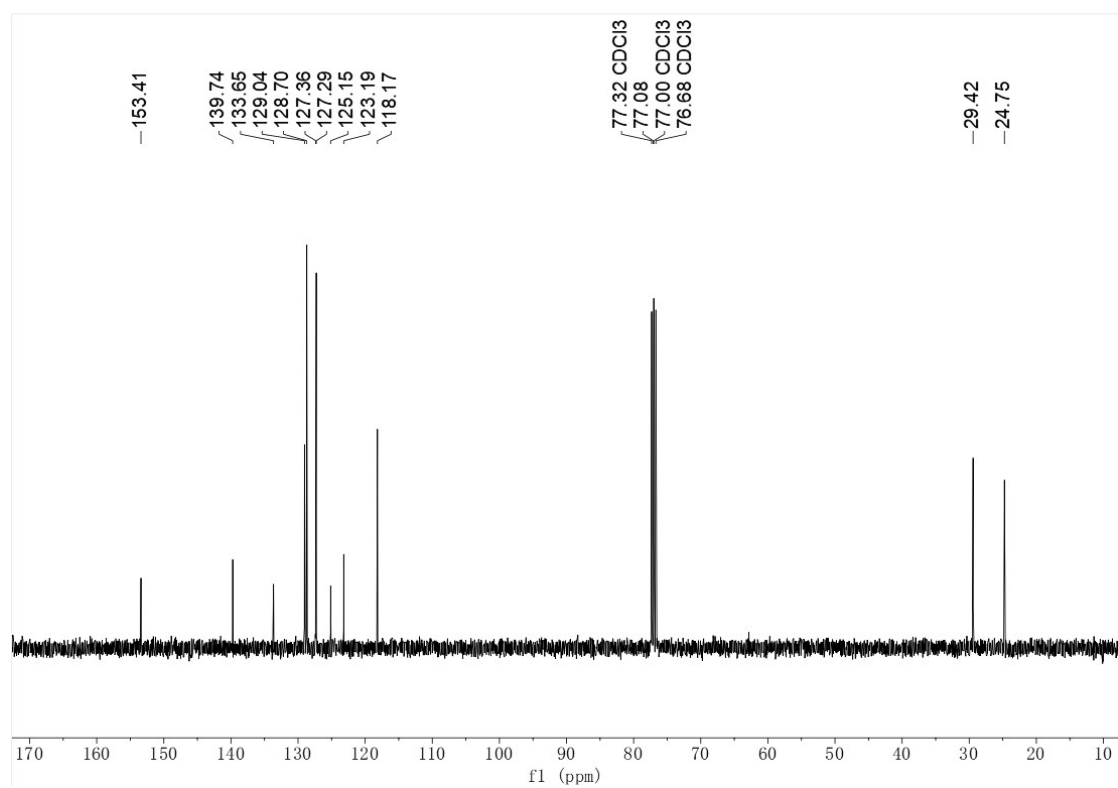



## 8. HRMS spectra of 3g

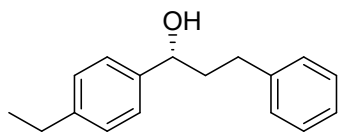

Na

3g

zhangdequan-20230824-54 #10-23 RT: 0.04-0.10 AV: 14 NL: 1.55E6  
T: FTMS + p ESI Full ms [100.0000-1500.0000]

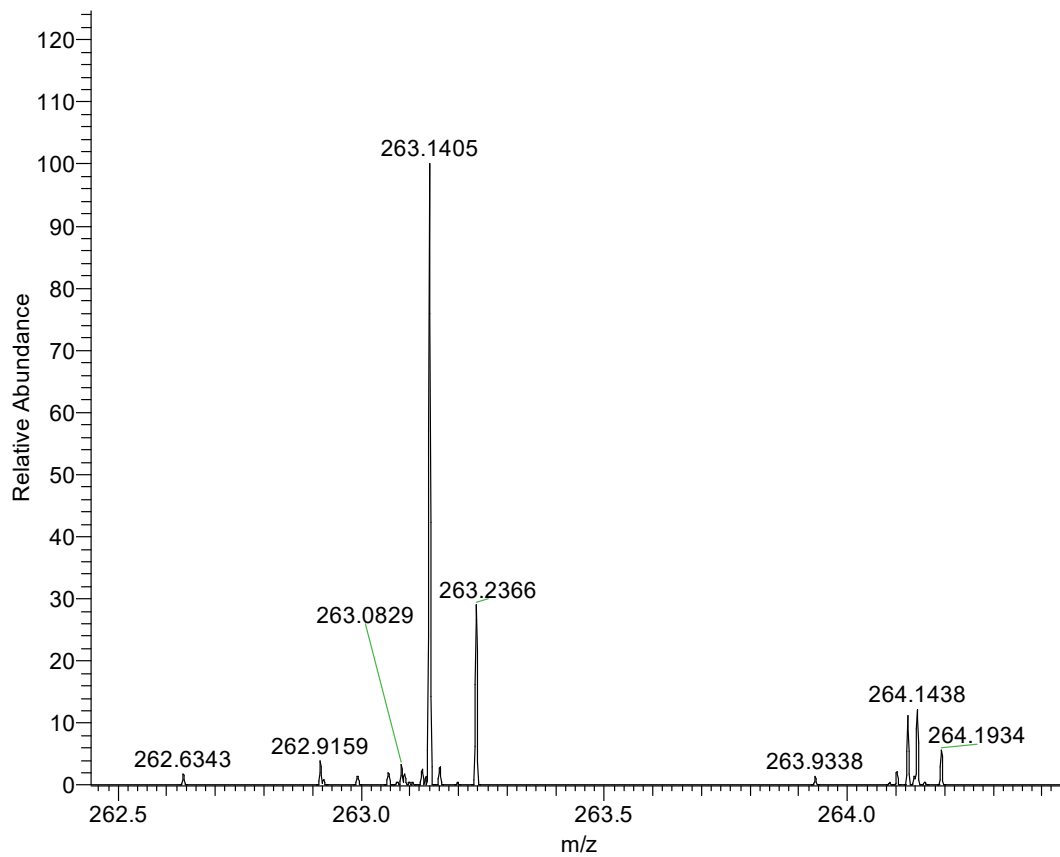

## 9. HPLC spectra of chiral alcohols

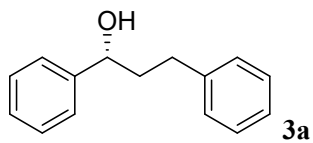

Chiralcel OD-H column, *n*-hexane/isopropanol = 95 : 5 (v/v), 1.0 mL/min, 220 nm, 30 °C

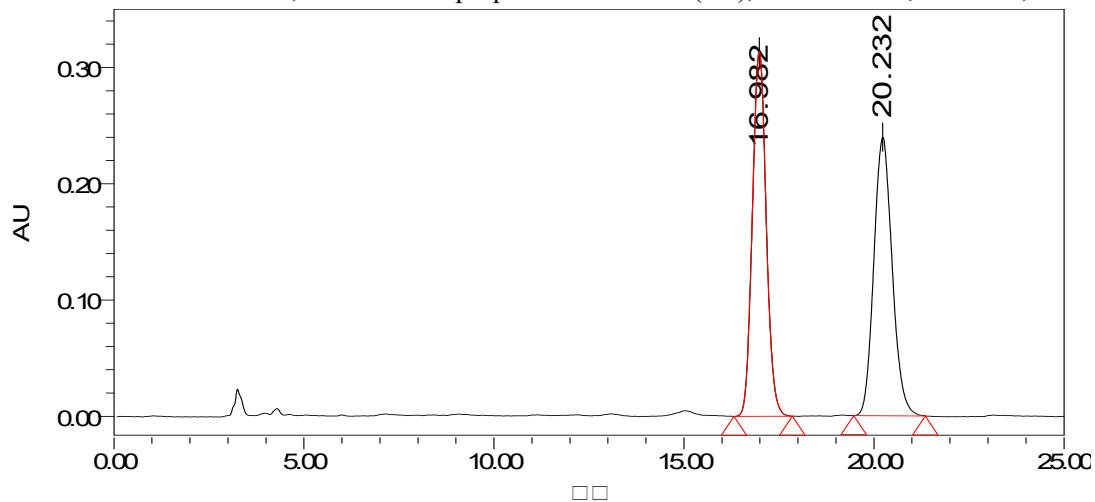

| Peak | Ret Time[min] | Area    | % Area | Height |
|------|---------------|---------|--------|--------|
| 1    | 16.982        | 7961334 | 49.78  | 313551 |
| 2    | 20.232        | 8032529 | 50.22  | 239690 |

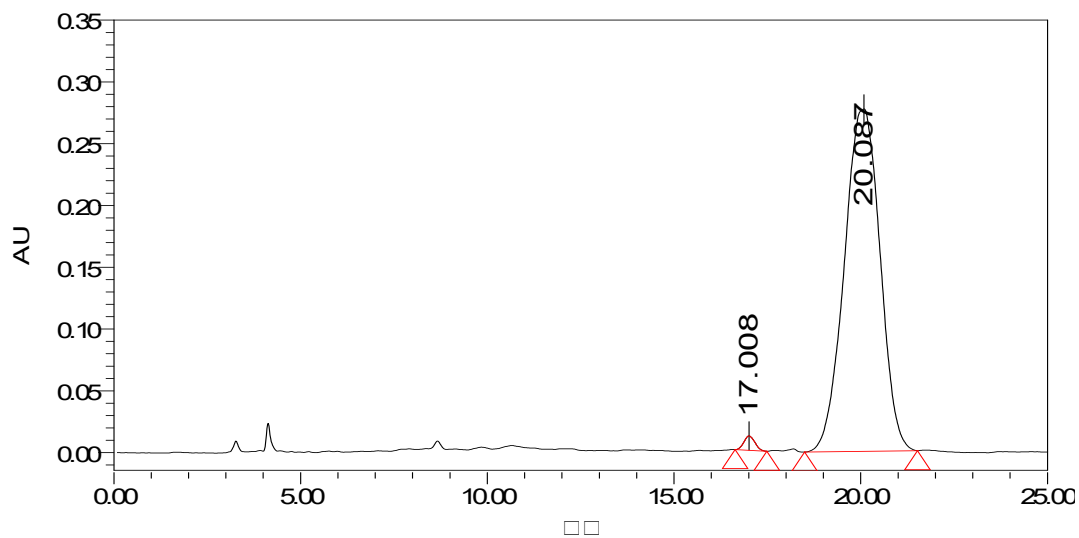

| Peak | Ret Time[min] | Area     | % Area | Height |
|------|---------------|----------|--------|--------|
| 1    | 17.008        | 179694   | 0.97   | 9973   |
| 2    | 20.087        | 18403209 | 99.03  | 277064 |

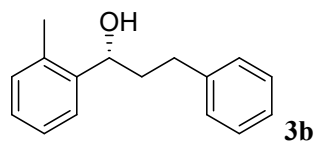

Chiralcel AD-H column, *n*-hexane/isopropanol = 99 : 1 (v/v), 1.0 mL/min, 220 nm, 30 °C

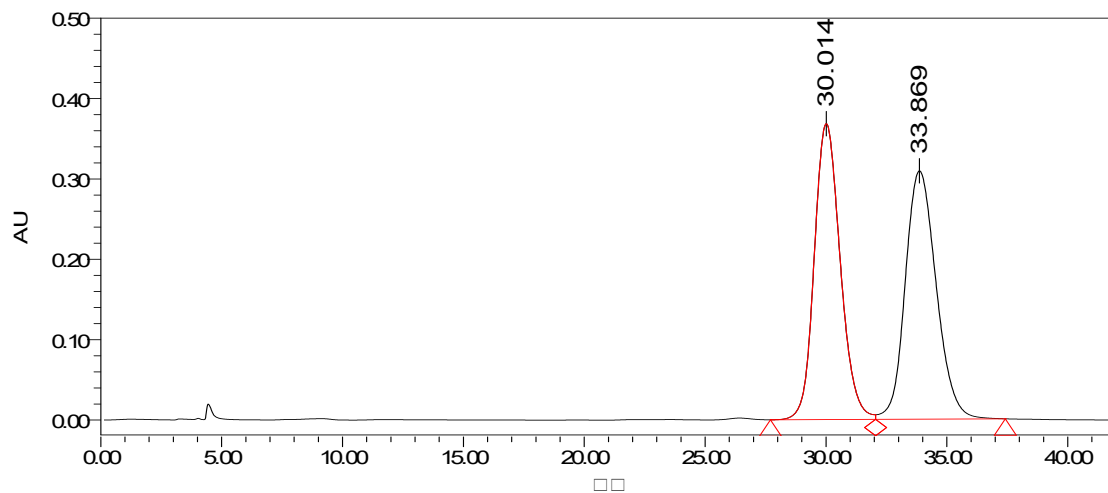

| Peak | Ret Time[min] | Area     | % Area | Height |
|------|---------------|----------|--------|--------|
| 1    | 30.014        | 27496738 | 49.98  | 368202 |
| 2    | 33.869        | 27516206 | 50.02  | 309012 |

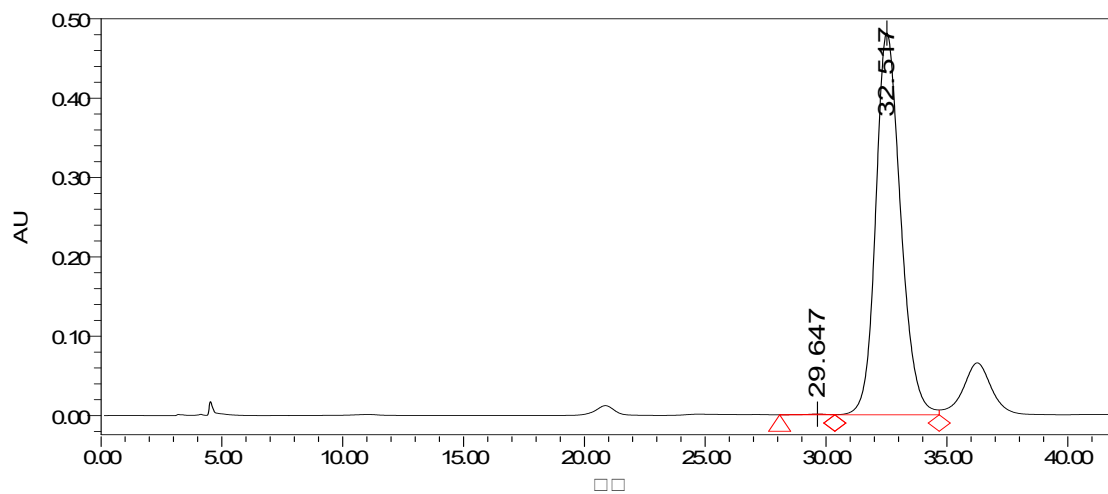

| Peak | Ret Time[min] | Area     | % Area | Height |
|------|---------------|----------|--------|--------|
| 1    | 29.647        | 56980    | 0.16   | 910    |
| 2    | 32.517        | 34502857 | 99.84  | 481193 |

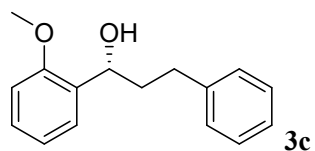

Chiralcel IB-H column, *n*-hexane/isopropanol = 95 : 5 (v/v), 1.0 mL/min, 220 nm, 30 °C

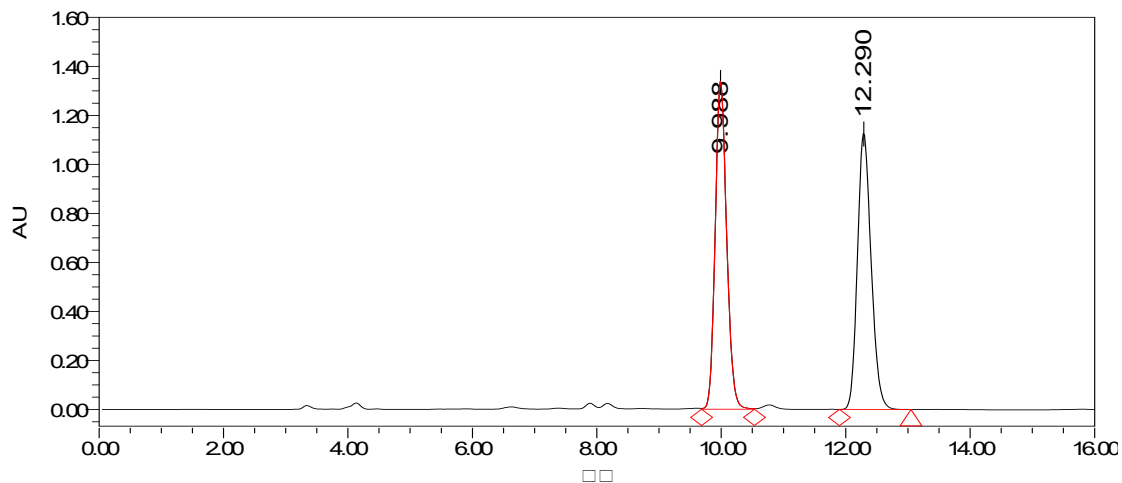

| Peak | Ret Time[min] | Area     | % Area | Height  |
|------|---------------|----------|--------|---------|
| 1    | 9.988         | 17118465 | 49.80  | 1338900 |
| 2    | 12.290        | 17253207 | 50.20  | 1127823 |

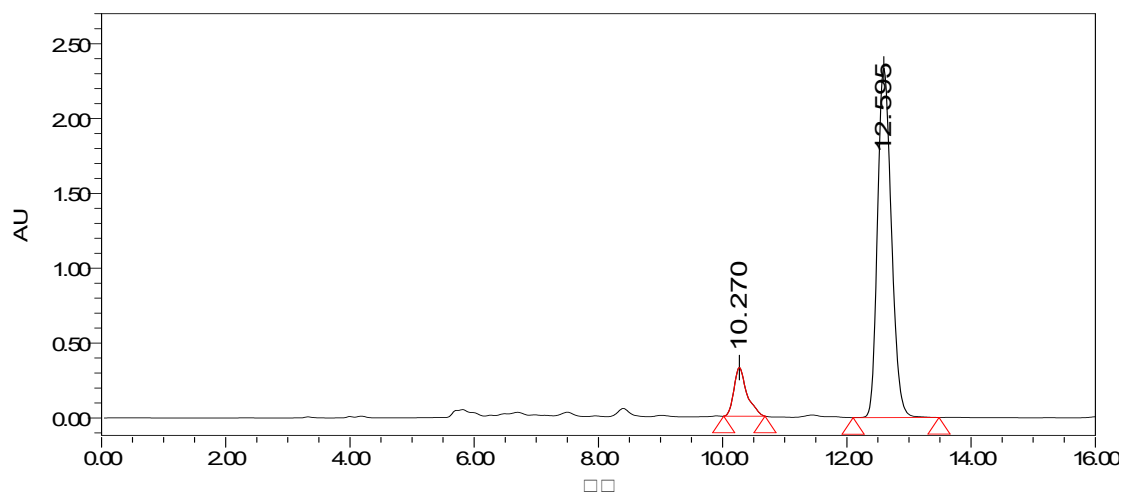

| Peak | Ret Time[min] | Area     | % Area | Height  |
|------|---------------|----------|--------|---------|
| 1    | 10.270        | 4726280  | 11.53  | 325723  |
| 2    | 12.595        | 36279832 | 88.47  | 2334596 |

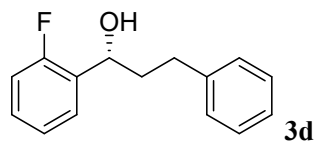

Chiralcel IA-H column, *n*-hexane/isopropanol = 95 : 5 (v/v), 1.0 mL/min, 220 nm, 30 °C

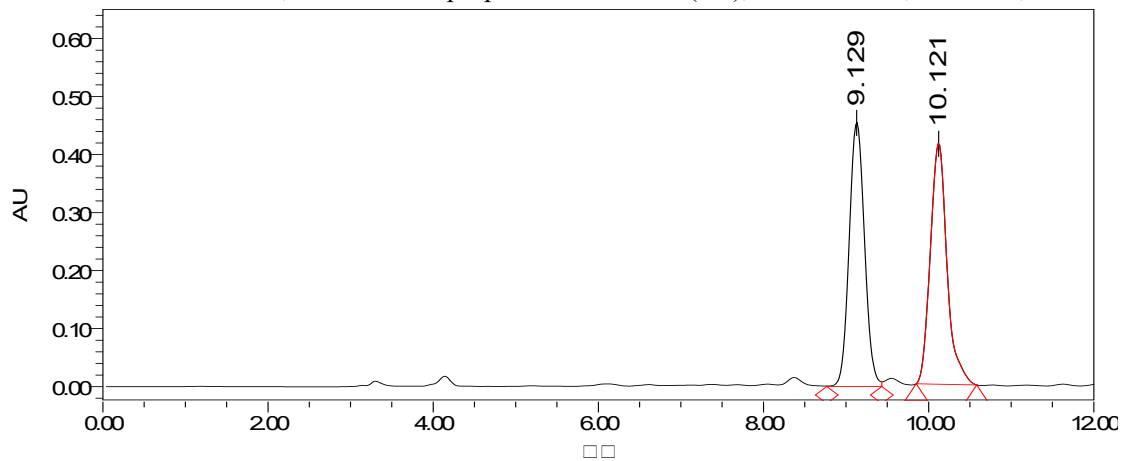

| Peak | Ret Time[min] | Area    | % Area | Height |
|------|---------------|---------|--------|--------|
| 1    | 9.129         | 5879751 | 50.15  | 455500 |
| 2    | 10.121        | 5843772 | 49.85  | 415329 |

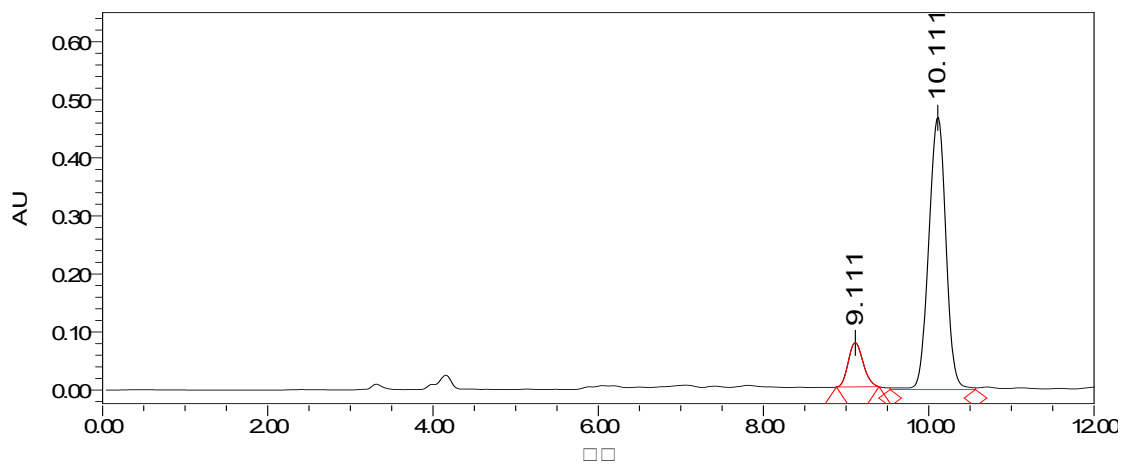

| Peak | Ret Time[min] | Area    | % Area | Height |
|------|---------------|---------|--------|--------|
| 1    | 9.111         | 952212  | 12.32  | 76230  |
| 2    | 10.111        | 6773738 | 87.68  | 469764 |

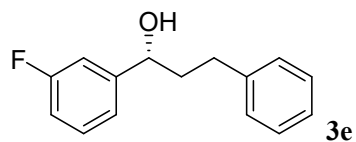

Chiralcel IA-H column, *n*-hexane/isopropanol = 95 : 5 (v/v), 1.0 mL/min, 220 nm, 30 °C

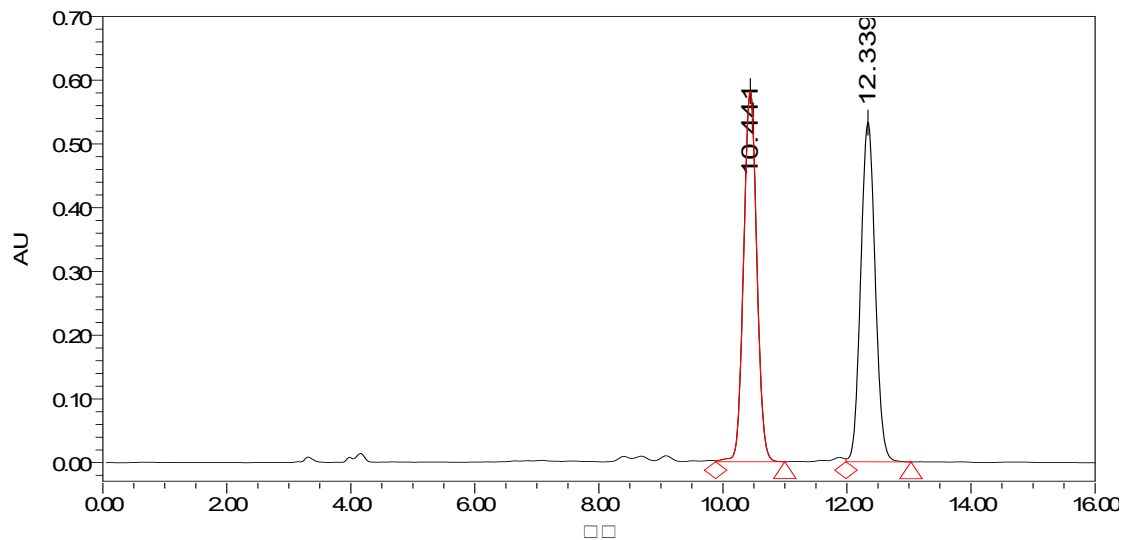

| Peak | Ret Time[min] | Area    | % Area | Height |
|------|---------------|---------|--------|--------|
| 1    | 10.441        | 8610979 | 49.93  | 583167 |
| 2    | 12.339        | 8633500 | 50.07  | 533425 |

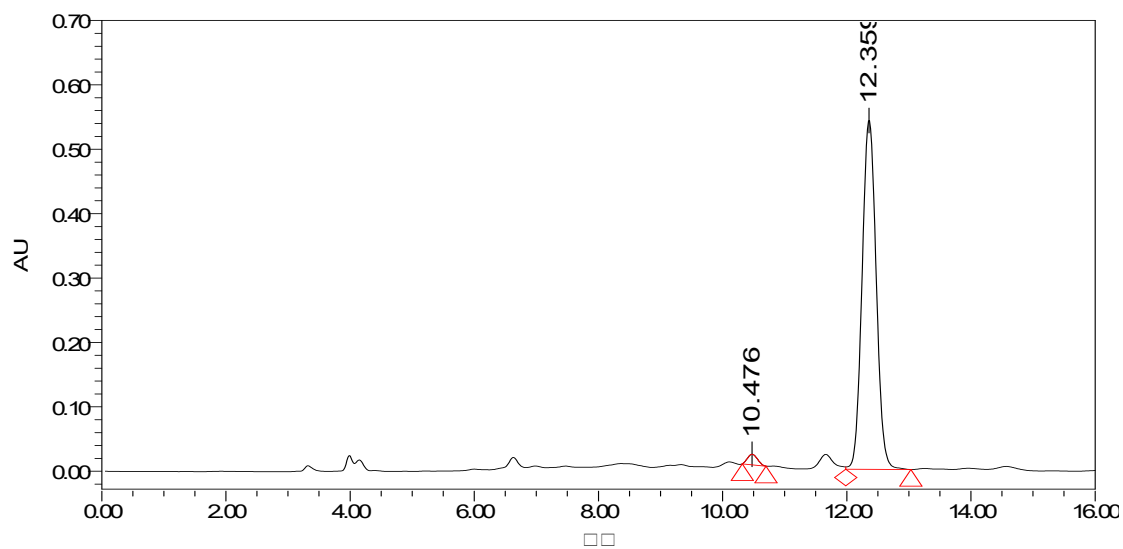

| Peak | Ret Time[min] | Area    | % Area | Height |
|------|---------------|---------|--------|--------|
| 1    | 10.476        | 182786  | 2.09   | 16406  |
| 2    | 12.359        | 8580609 | 97.91  | 542986 |

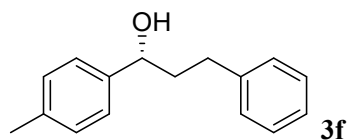

Chiralcel OD-H column, *n*-hexane/isopropanol = 95 : 5 (v/v), 1.0 mL/min, 220 nm, 30 °C

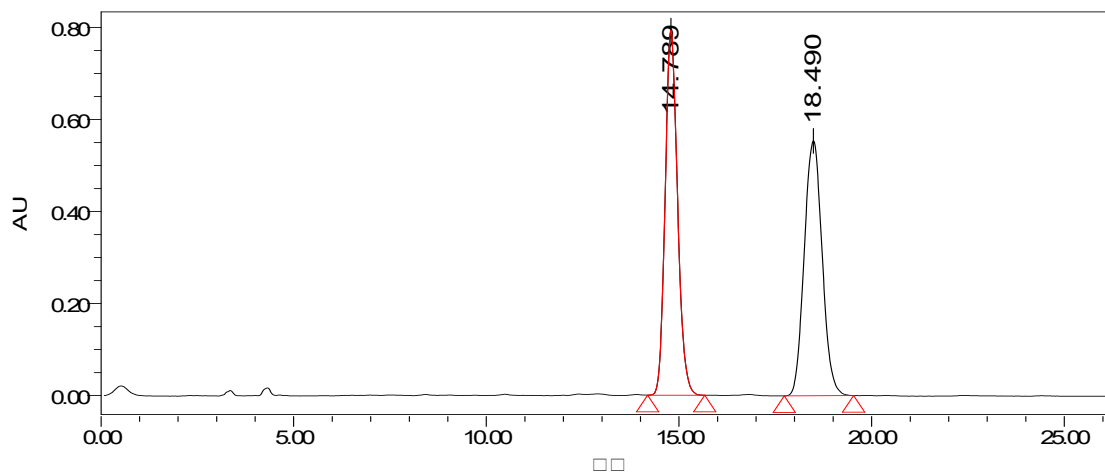

| Peak | Ret Time[min] | Area     | % Area | Height |
|------|---------------|----------|--------|--------|
| 1    | 14.789        | 17747508 | 49.76  | 793713 |
| 2    | 18.490        | 17915521 | 50.24  | 554166 |

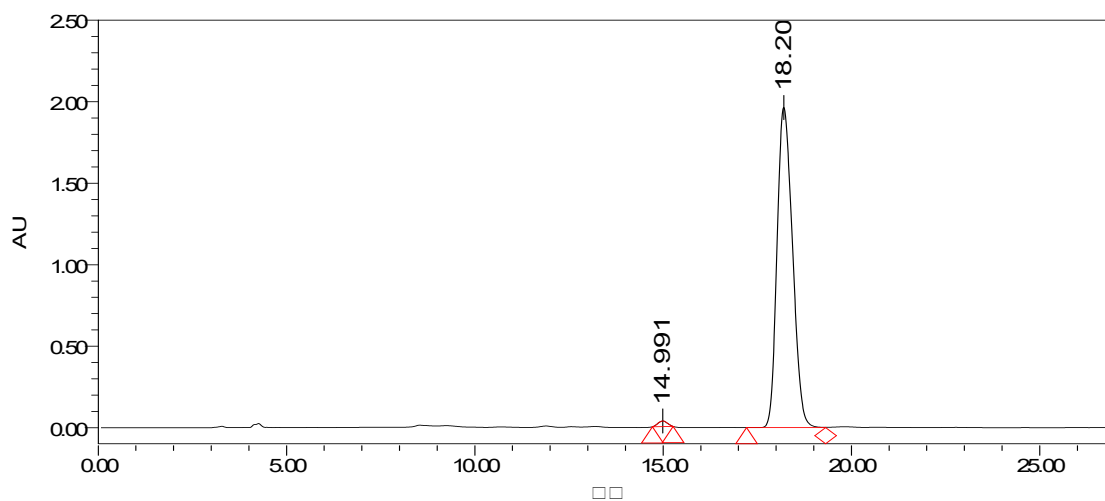

| Peak | Ret Time[min] | Area     | % Area | Height  |
|------|---------------|----------|--------|---------|
| 1    | 14.991        | 595698   | 1.05   | 34065   |
| 2    | 18.204        | 56053546 | 98.95  | 1965474 |

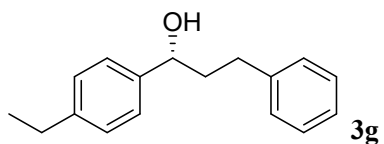

Chiralcel OJ-H column, *n*-hexane/isopropanol = 95 : 5 (v/v), 1.0 mL/min, 220 nm, 30 °C

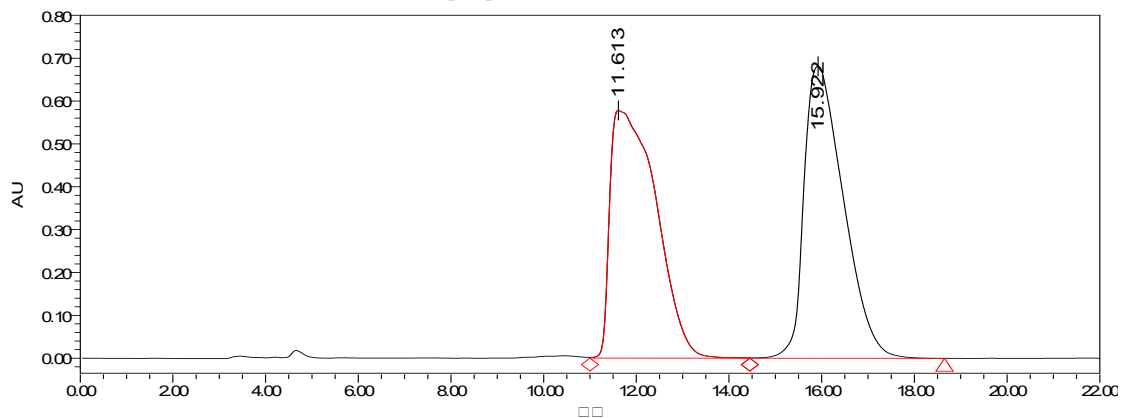

| Peak | Ret Time[min] | Area     | % Area | Height |
|------|---------------|----------|--------|--------|
| 1    | 11.613        | 40059571 | 49.87  | 578149 |
| 2    | 15.922        | 40270071 | 50.13  | 681625 |

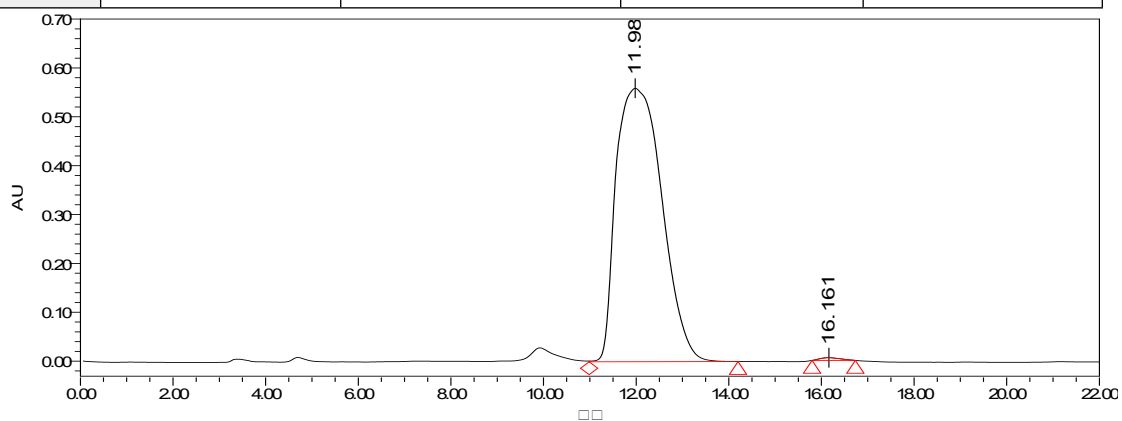

| Peak | Ret Time[min] | Area     | % Area | Height |
|------|---------------|----------|--------|--------|
| 1    | 11.980        | 38608598 | 99.56  | 559652 |
| 2    | 16.161        | 169214   | 0.44   | 5604   |



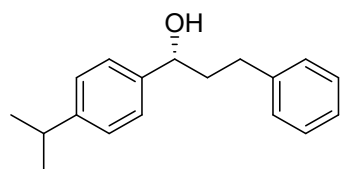

**3h**

Chiralcel IB-H column, *n*-hexane/isopropanol = 95 : 5 (v/v), 1.0 mL/min, 220 nm, 30 °C

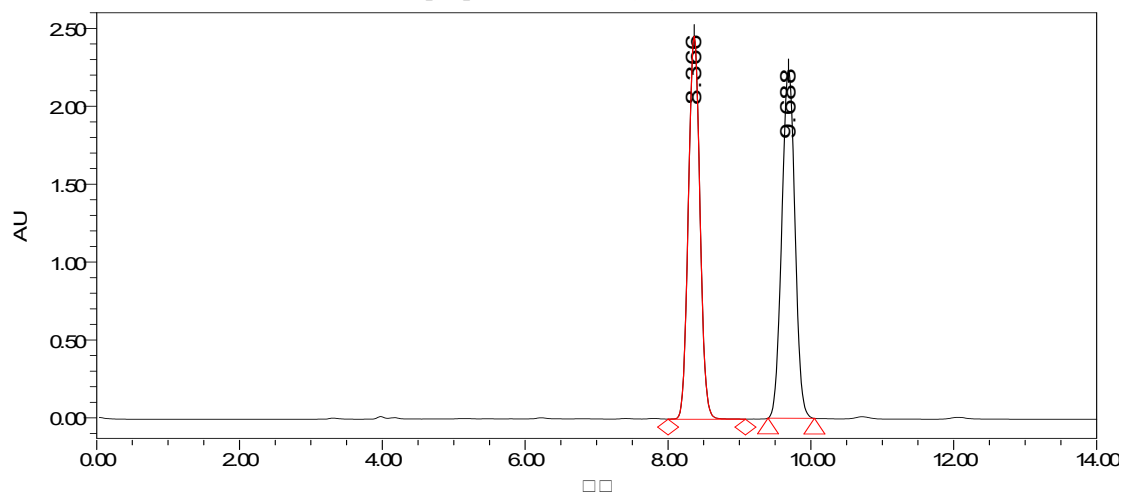

| Peak | Ret Time[min] | Area     | % Area | Height  |
|------|---------------|----------|--------|---------|
| 1    | 8.366         | 27757800 | 49.21  | 2458396 |
| 2    | 9.688         | 28651207 | 50.79  | 2237007 |

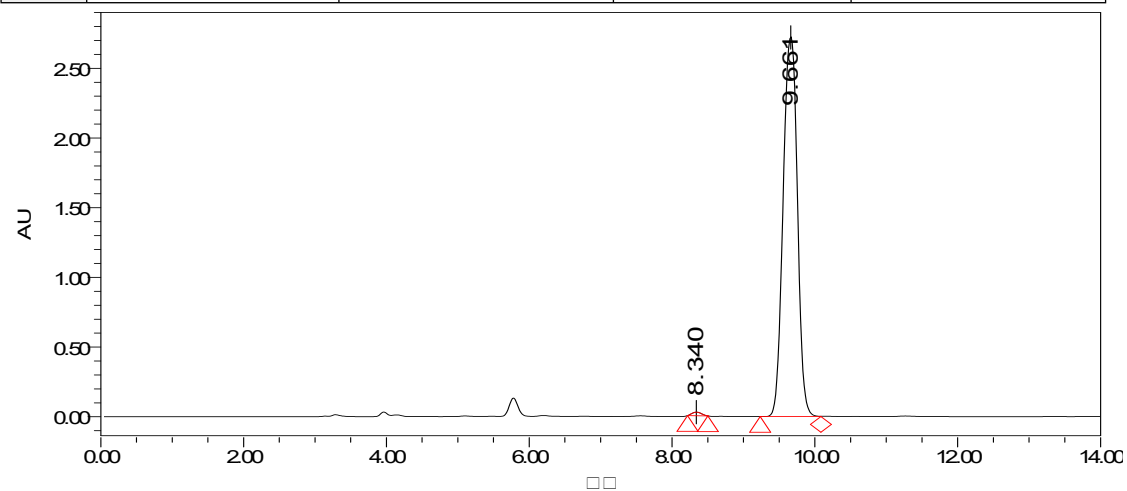

| Peak | Ret Time[min] | Area     | % Area | Height  |
|------|---------------|----------|--------|---------|
| 1    | 8.340         | 240601   | 0.63   | 26171   |
| 2    | 9.661         | 37755822 | 99.37  | 2728474 |

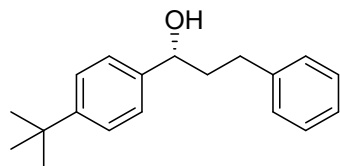

3i

Chiralcel OJ-H column, *n*-hexane/isopropanol = 95 : 5 (v/v), 1.0 mL/min, 220 nm, 30 °C

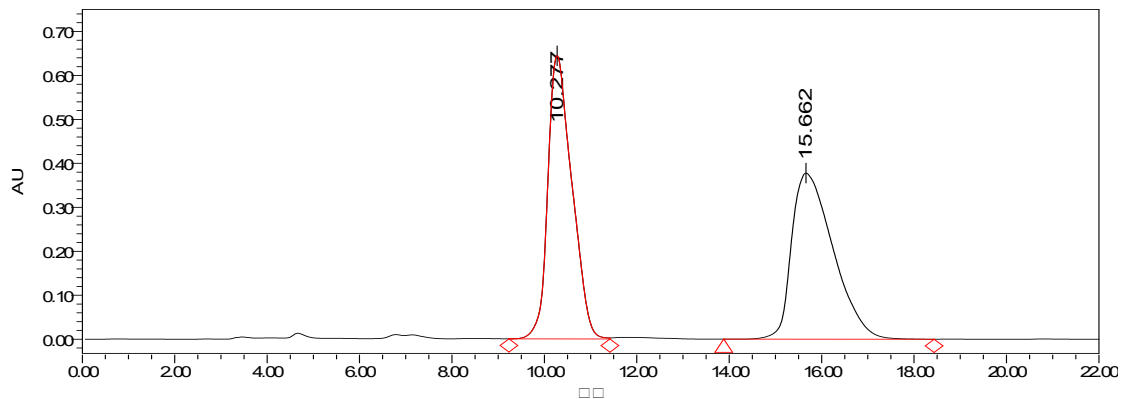

| Peak | Ret Time[min] | Area     | % Area | Height |
|------|---------------|----------|--------|--------|
| 1    | 10.277        | 23356855 | 49.76  | 644343 |
| 2    | 15.662        | 23586520 | 50.24  | 378008 |

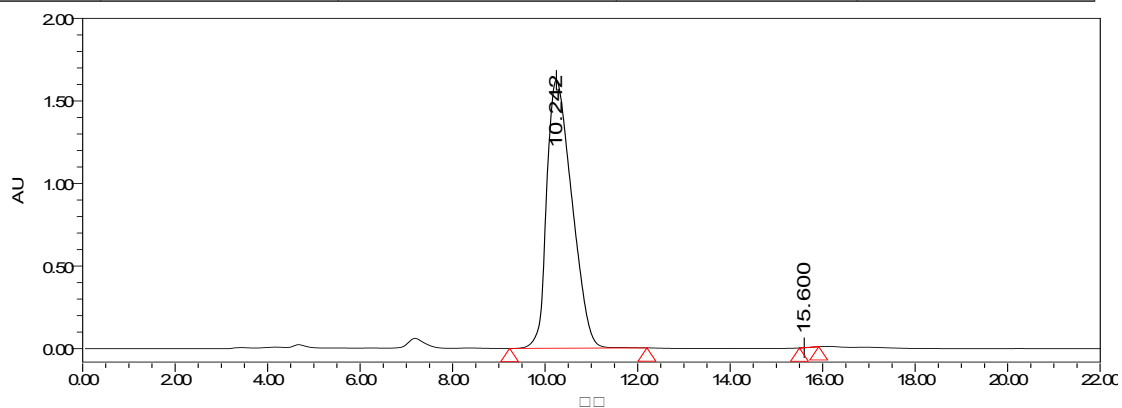

| Peak | Ret Time[min] | Area     | % Area | Height  |
|------|---------------|----------|--------|---------|
| 1    | 10.242        | 61273139 | 99.99  | 1624165 |
| 2    | 15.600        | 4287     | 0.01   | 390     |

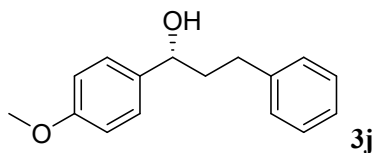

Chiralcel AD-H column, *n*-hexane/isopropanol = 95 : 5 (v/v), 1.0 mL/min, 220 nm, 30 °C

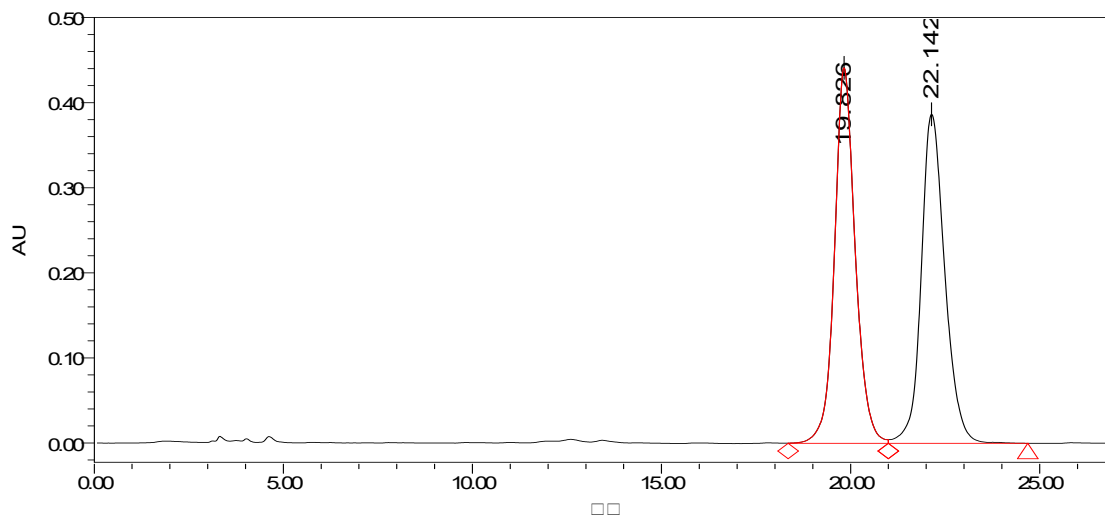

| Peak | Ret Time[min] | Area     | % Area | Height |
|------|---------------|----------|--------|--------|
| 1    | 19.826        | 16890353 | 50.08  | 441484 |
| 2    | 22.142        | 16833467 | 49.92  | 386838 |

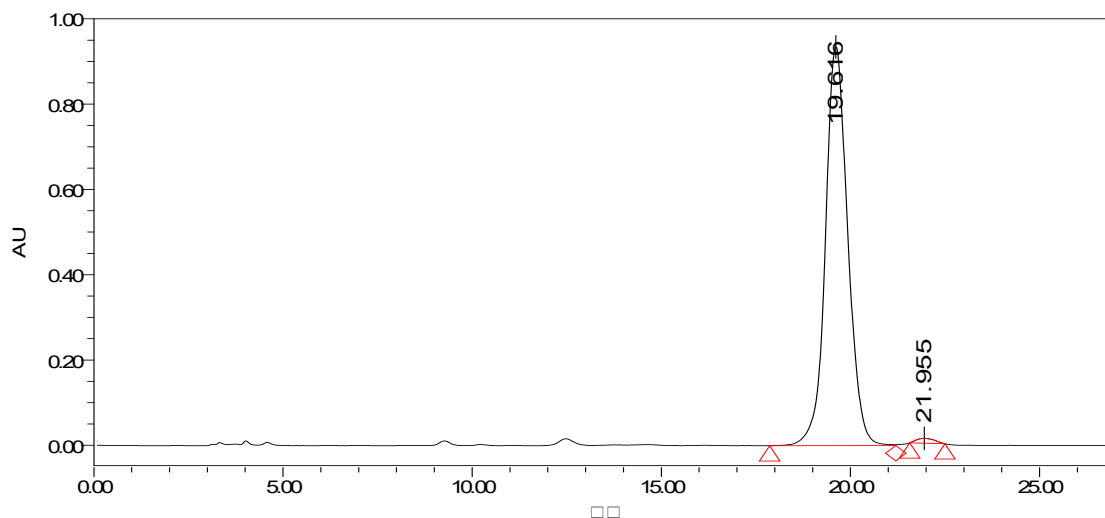

| Peak | Ret Time[min] | Area     | % Area | Height |
|------|---------------|----------|--------|--------|
| 1    | 19.616        | 38417128 | 99.02  | 934913 |
| 2    | 21.955        | 381332   | 0.98   | 11271  |

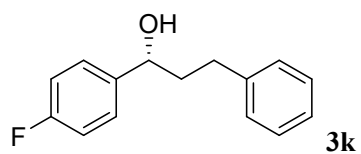

Chiralcel IA-H column, *n*-hexane/isopropanol = 95 : 5 (v/v), 1.0 mL/min, 220 nm, 30 °C

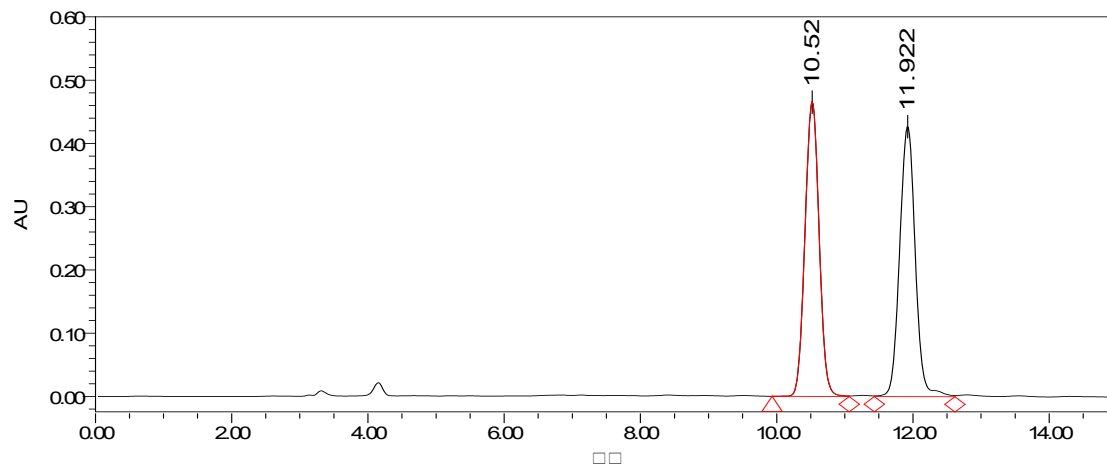

| Peak | Ret Time[min] | Area    | % Area | Height |
|------|---------------|---------|--------|--------|
| 1    | 10.521        | 6721214 | 49.69  | 466265 |
| 2    | 11.922        | 6806138 | 50.31  | 427656 |

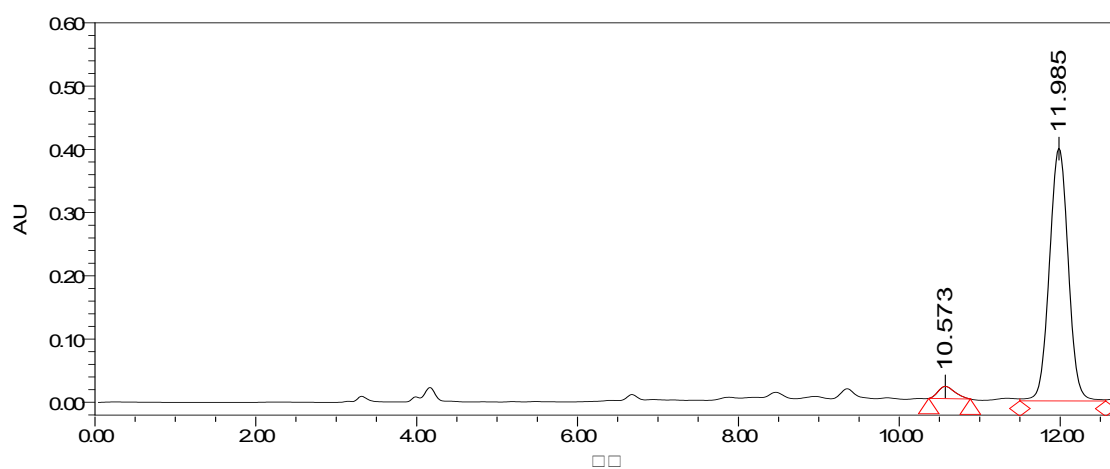

| Peak | Ret Time[min] | Area    | % Area | Height |
|------|---------------|---------|--------|--------|
| 1    | 10.573        | 280492  | 4.13   | 19414  |
| 2    | 11.985        | 6506196 | 95.87  | 399576 |



Chiralcel OD-H column, *n*-hexane/isopropanol = 95 : 5 (v/v), 1.0 mL/min, 220 nm, 30 °C

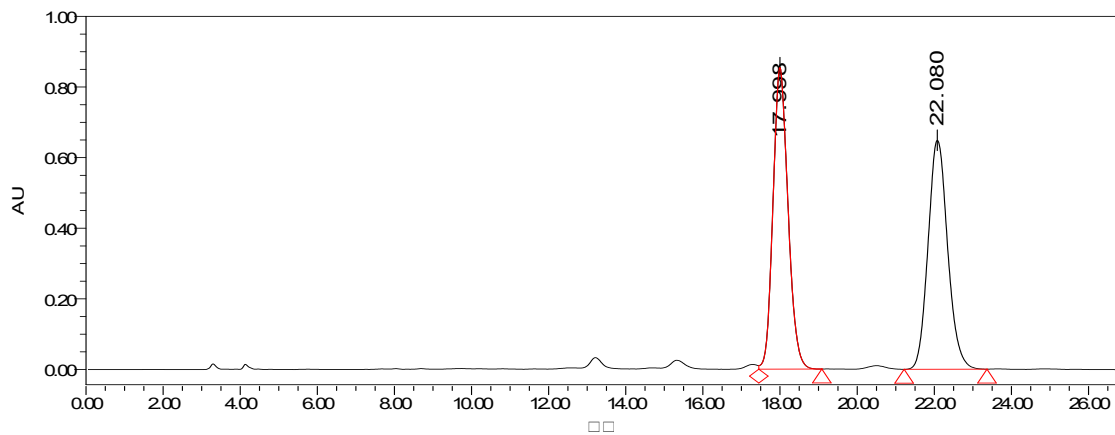

| Peak | Ret Time[min] | Area     | % Area | Height |
|------|---------------|----------|--------|--------|
| 1    | 17.998        | 23076013 | 50.17  | 854289 |
| 2    | 22.080        | 22920351 | 49.83  | 648719 |

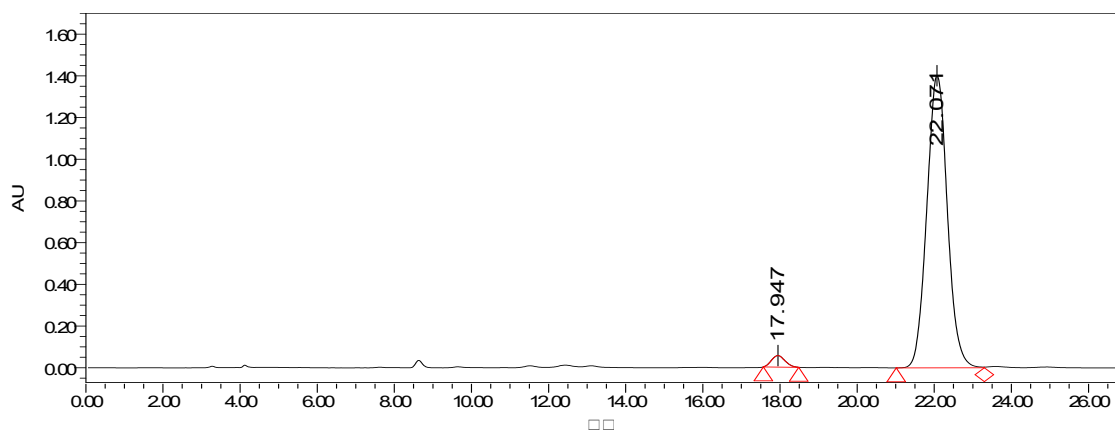

| Peak | Ret Time[min] | Area     | % Area | Height  |
|------|---------------|----------|--------|---------|
| 1    | 17.947        | 1341968  | 2.52   | 54977   |
| 2    | 22.071        | 51894151 | 97.48  | 1401879 |

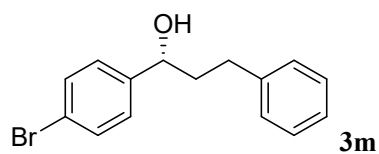

Chiralcel OD-H column, *n*-hexane/isopropanol = 95 : 5 (v/v), 1.0 mL/min, 220 nm, 30 °C

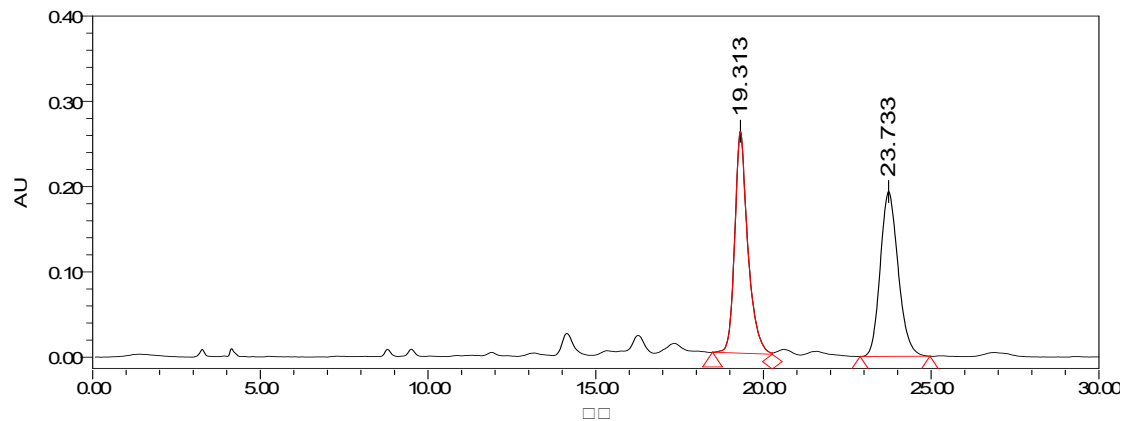

| Peak | Ret Time[min] | Area    | % Area | Height |
|------|---------------|---------|--------|--------|
| 1    | 19.313        | 7056678 | 49.65  | 260588 |
| 2    | 23.733        | 7157096 | 50.35  | 193259 |

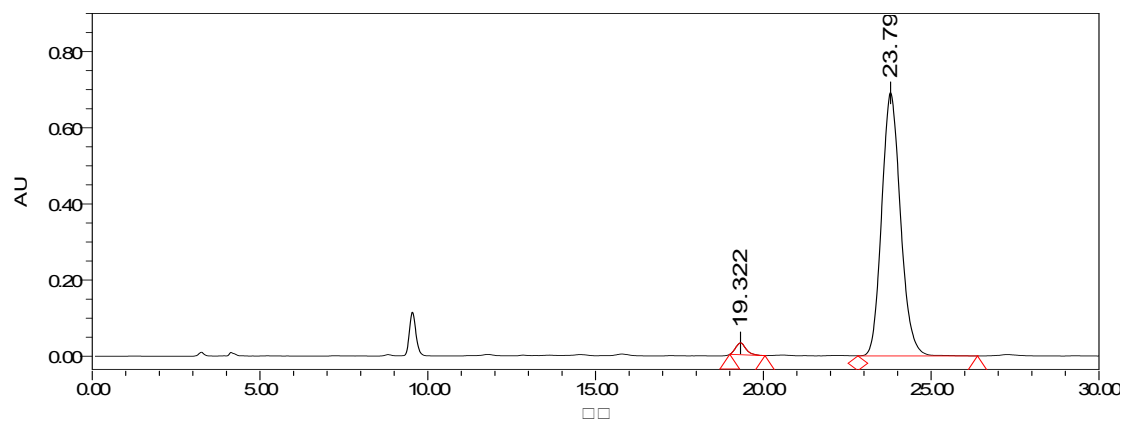

| Peak | Ret Time[min] | Area     | % Area | Height |
|------|---------------|----------|--------|--------|
| 1    | 19.322        | 670677   | 2.43   | 31225  |
| 2    | 23.792        | 26875930 | 97.57  | 691488 |



Chiralcel IB-H column, *n*-hexane/isopropanol = 95 : 5 (v/v), 1.0 mL/min, 220 nm, 30 °C

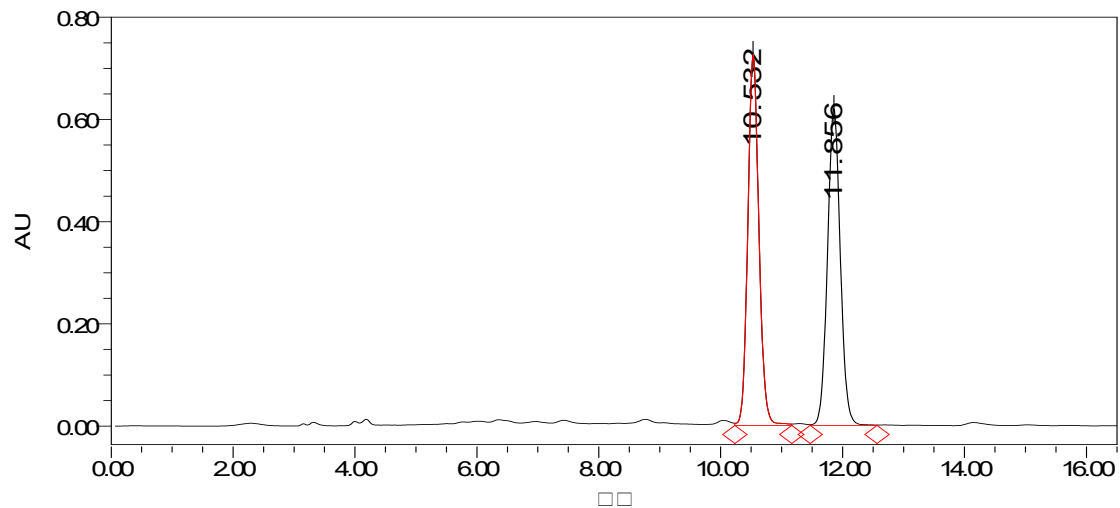

| Peak | Ret Time[min] | Area    | % Area | Height |
|------|---------------|---------|--------|--------|
| 1    | 10.532        | 9193096 | 50.30  | 725684 |
| 2    | 11.856        | 9083974 | 49.70  | 621387 |

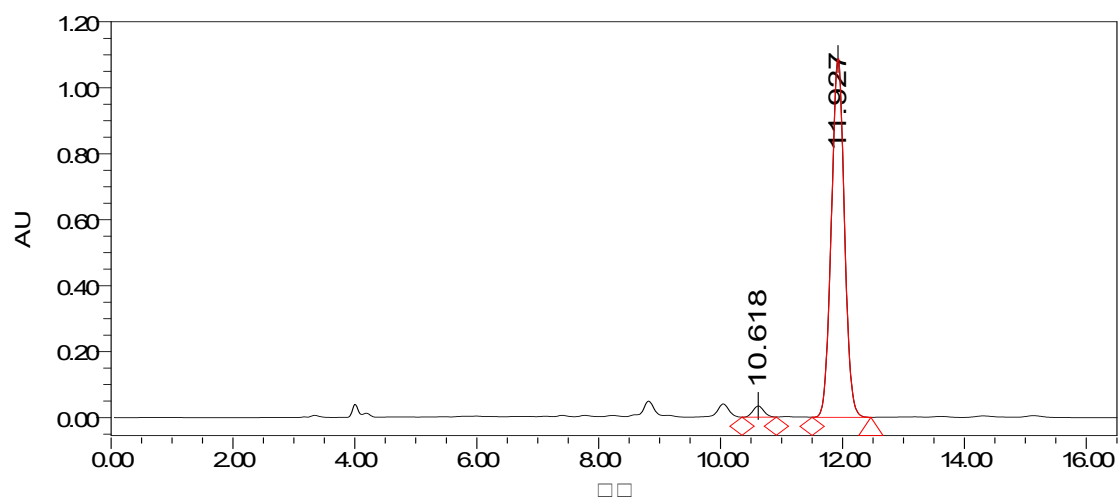

| Peak | Ret Time[min] | Area     | % Area | Height  |
|------|---------------|----------|--------|---------|
| 1    | 10.618        | 378324   | 2.28   | 32046   |
| 2    | 11.927        | 16231256 | 97.72  | 1089578 |

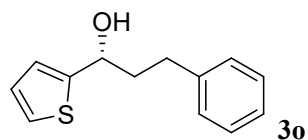

Chiralcel OD-H column, *n*-hexane/isopropanol = 95 : 5 (v/v), 1.0 mL/min, 220 nm, 30 °C

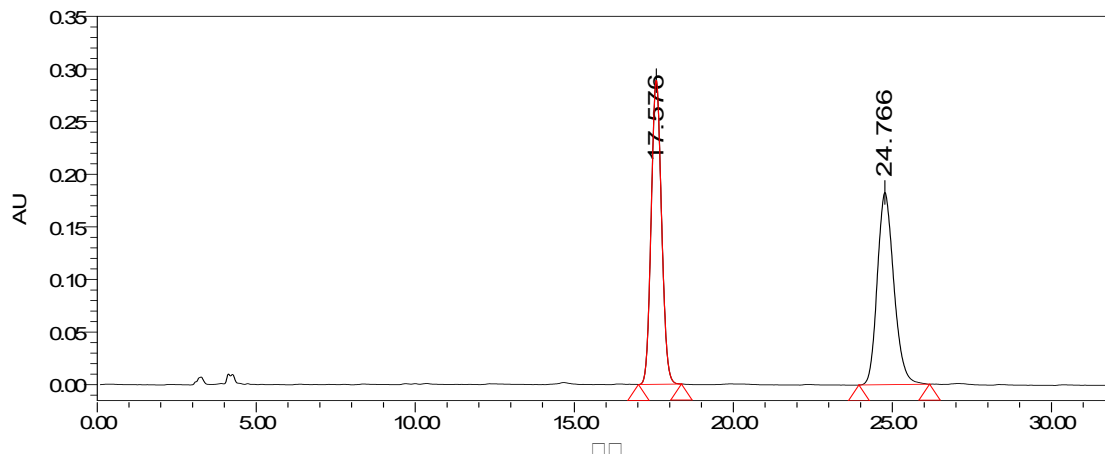

| Peak | Ret Time[min] | Area    | % Area | Height |
|------|---------------|---------|--------|--------|
| 1    | 17.576        | 6513370 | 49.72  | 289001 |
| 2    | 24.766        | 6586665 | 50.28  | 182714 |

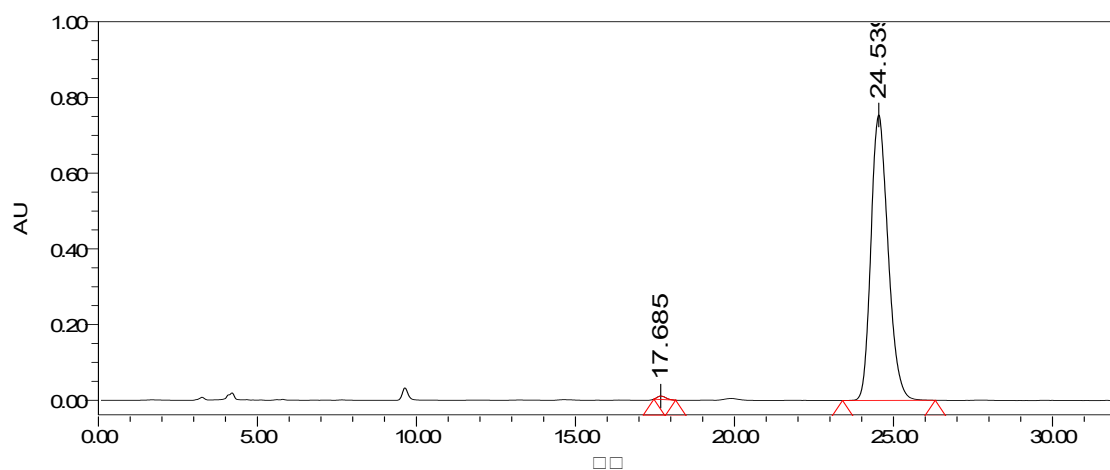

| Peak | Ret Time[min] | Area     | % Area | Height |
|------|---------------|----------|--------|--------|
| 1    | 17.685        | 165790   | 0.58   | 8907   |
| 2    | 24.539        | 28237388 | 99.42  | 754469 |



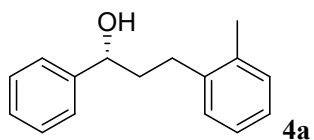

Chiralcel OD-H column, *n*-hexane/isopropanol = 95 : 5 (v/v), 1.0 mL/min, 220 nm, 30 °C

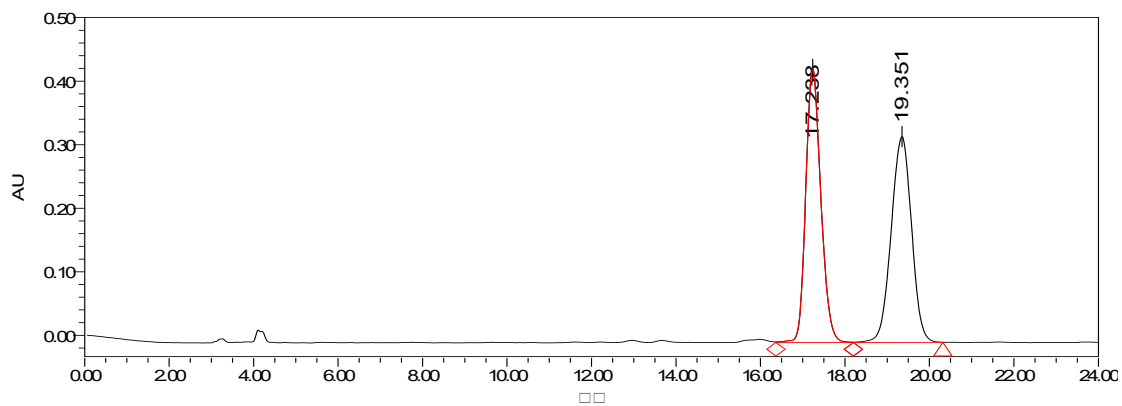

| Peak | Ret Time[min] | Area     | % Area | Height |
|------|---------------|----------|--------|--------|
| 1    | 17.238        | 10675398 | 49.64  | 430240 |
| 2    | 19.351        | 10828971 | 50.36  | 323789 |

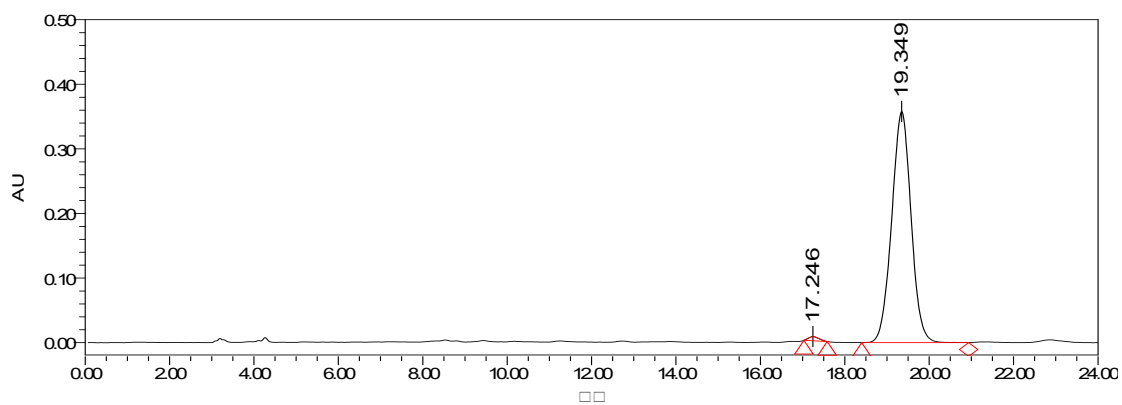

| Peak | Ret Time[min] | Area     | % Area | Height |
|------|---------------|----------|--------|--------|
| 1    | 17.246        | 111675   | 0.97   | 6443   |
| 2    | 19.349        | 11416530 | 99.03  | 357973 |

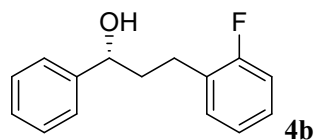

Chiralcel OD-H column, *n*-hexane/isopropanol = 95 : 5 (v/v), 1.0 mL/min, 220 nm, 30 °C

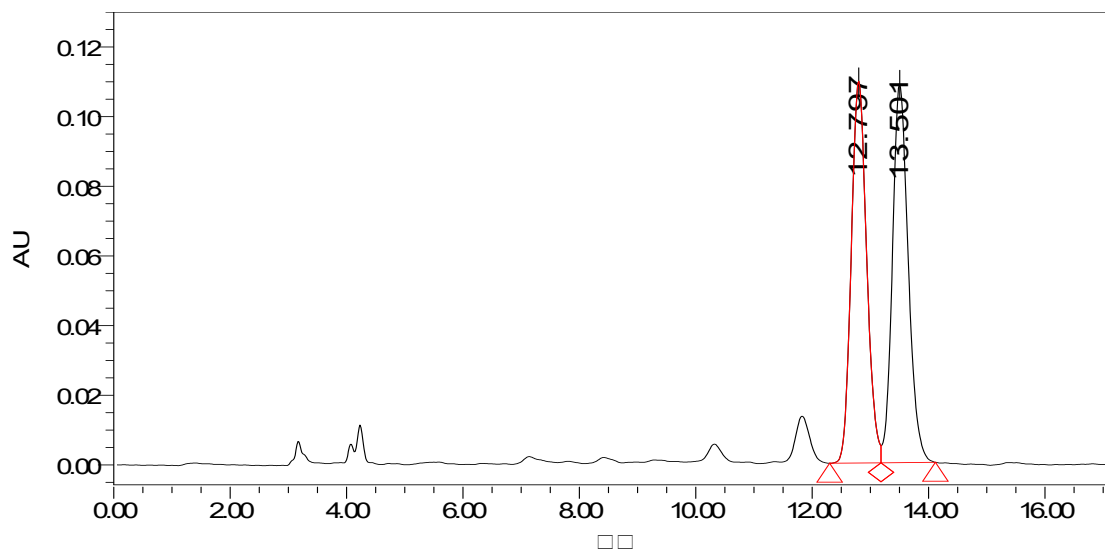

| Peak | Ret Time[min] | Area    | % Area | Height |
|------|---------------|---------|--------|--------|
| 1    | 12.797        | 2019330 | 49.57  | 109553 |
| 2    | 13.501        | 2054432 | 50.43  | 108669 |

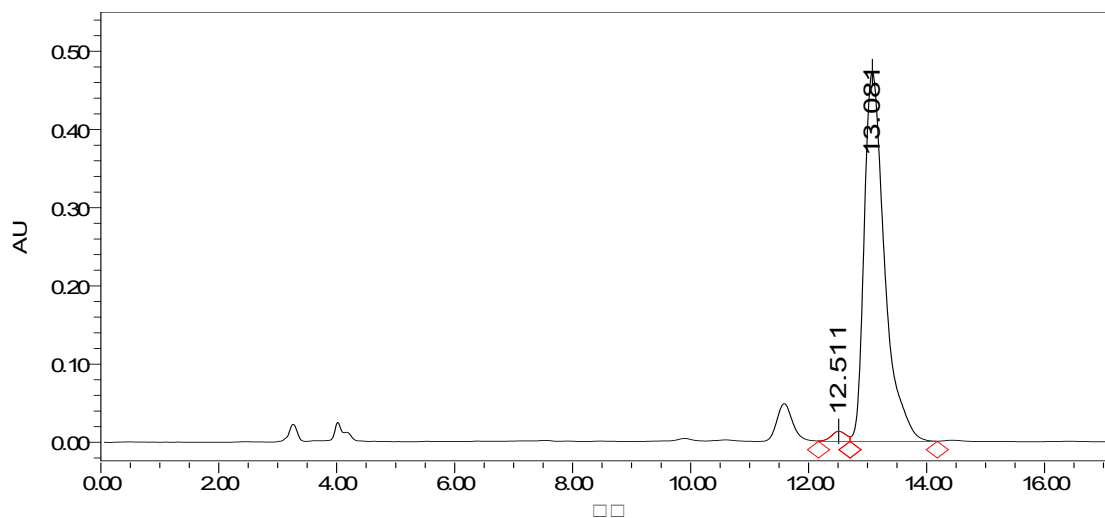

| Peak | Ret Time[min] | Area     | % Area | Height |
|------|---------------|----------|--------|--------|
| 1    | 12.511        | 179068   | 1.55   | 13015  |
| 2    | 13.081        | 11396790 | 98.45  | 473172 |

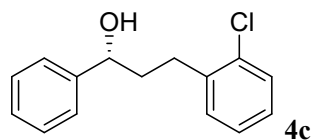

Chiralcel OD-H column, *n*-hexane/isopropanol = 95 : 5 (v/v), 1.0 mL/min, 220 nm, 30 °C

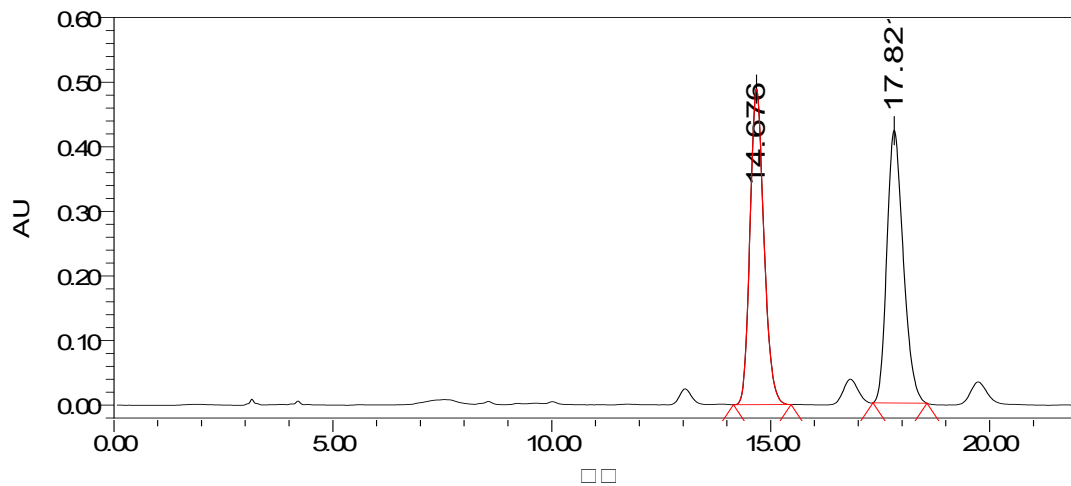

| Peak | Ret Time[min] | Area     | % Area | Height |
|------|---------------|----------|--------|--------|
| 1    | 14.676        | 10788816 | 49.56  | 489300 |
| 2    | 17.821        | 10982317 | 50.44  | 421915 |

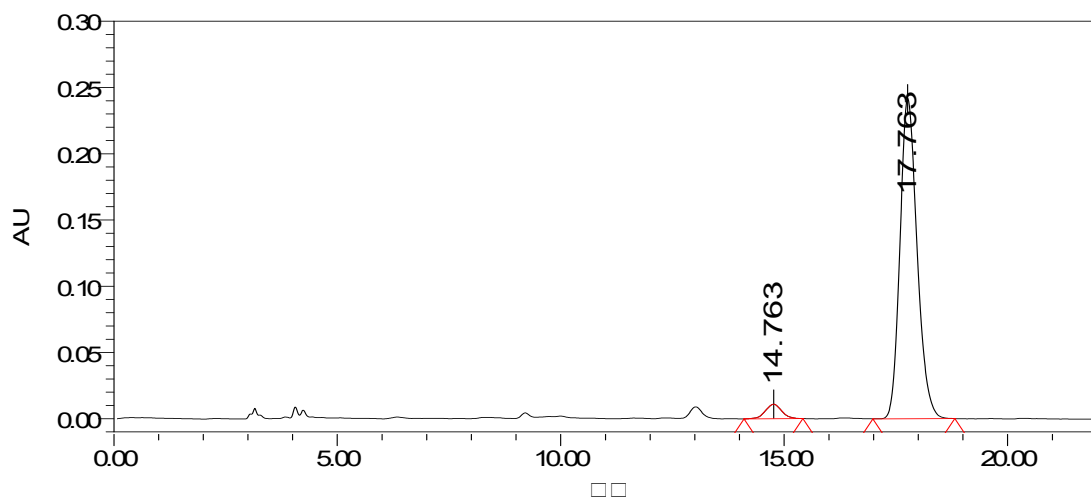

| Peak | Ret Time[min] | Area    | % Area | Height |
|------|---------------|---------|--------|--------|
| 1    | 14.763        | 171048  | 2.59   | 8650   |
| 2    | 17.763        | 6443081 | 97.41  | 241733 |

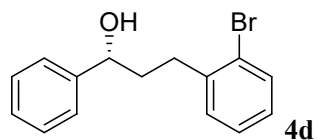

Chiralcel OJ-H column, *n*-hexane/isopropanol = 95 : 5 (v/v), 1.0 mL/min, 220 nm, 30 °C

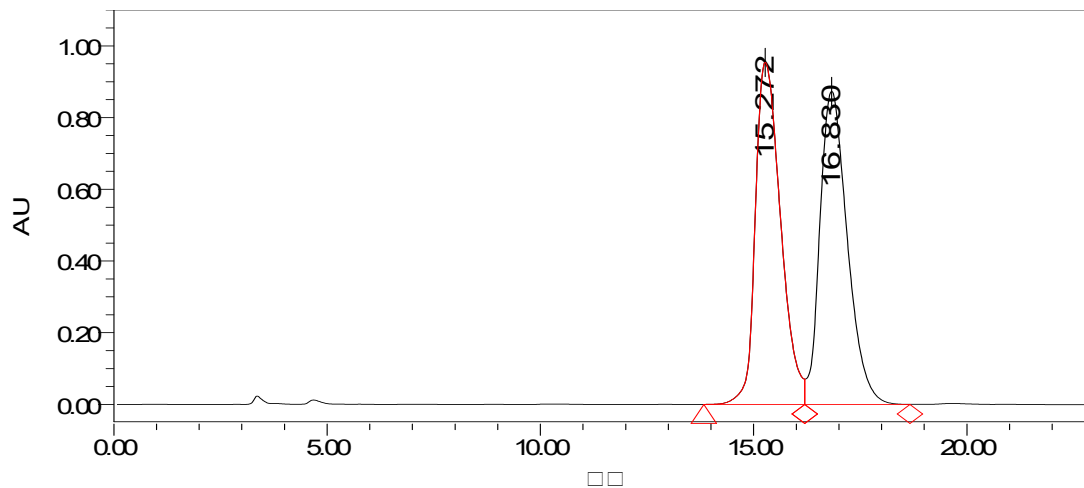

| Peak | Ret Time[min] | Area     | % Area | Height |
|------|---------------|----------|--------|--------|
| 1    | 15.272        | 39340111 | 50.14  | 953936 |
| 2    | 16.830        | 39114716 | 49.86  | 872928 |

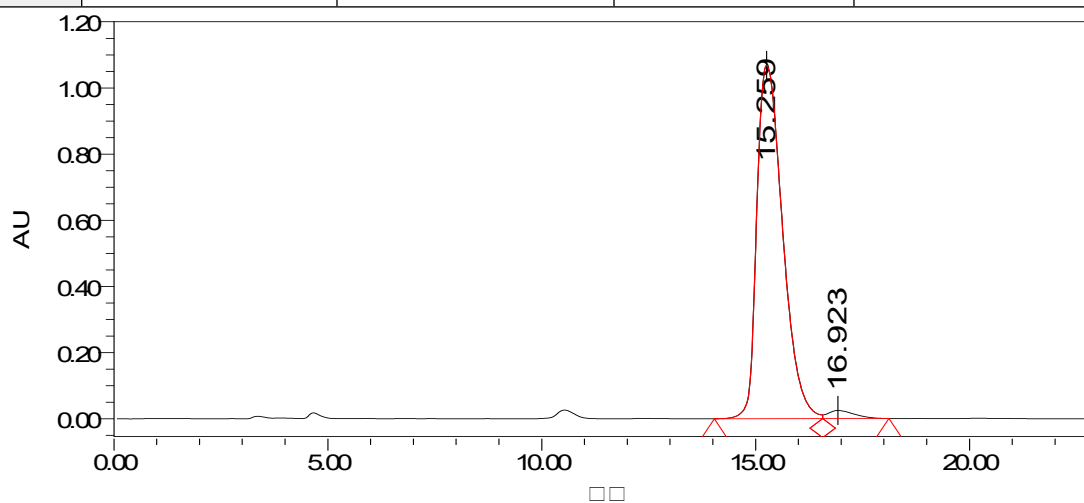

| Peak | Ret Time[min] | Area     | % Area | Height  |
|------|---------------|----------|--------|---------|
| 1    | 15.259        | 45099553 | 98.38  | 1068026 |
| 2    | 16.923        | 741348   | 1.62   | 24529   |

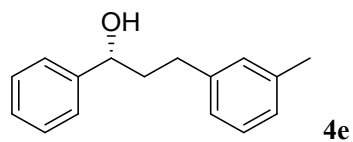

Chiralcel OD-H column, *n*-hexane/isopropanol = 95 : 5 (v/v), 1.0 mL/min, 220 nm, 30 °C

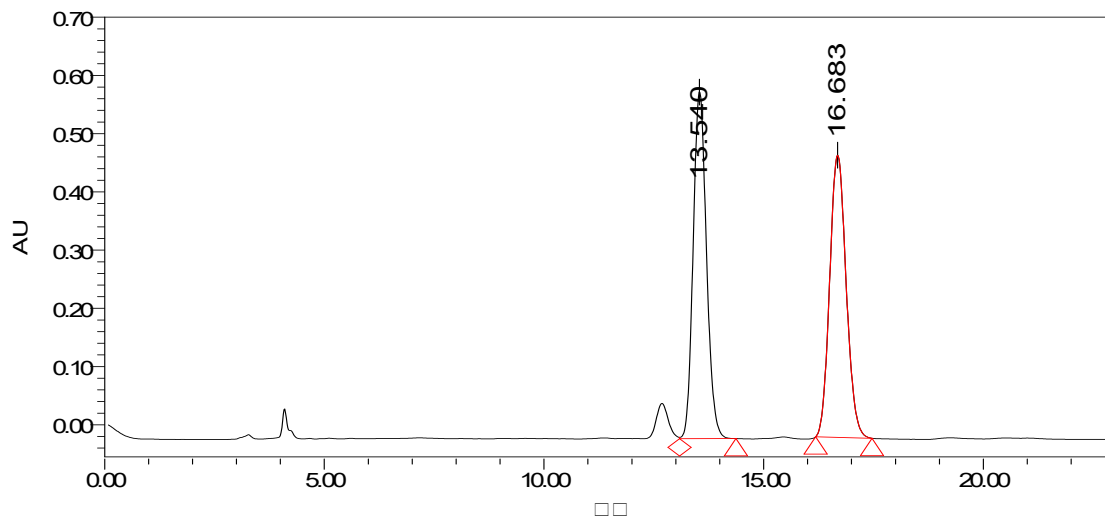

| Peak | Ret Time[min] | Area     | % Area | Height |
|------|---------------|----------|--------|--------|
| 1    | 13.540        | 12536857 | 49.75  | 596005 |
| 2    | 16.683        | 12664301 | 50.25  | 484791 |

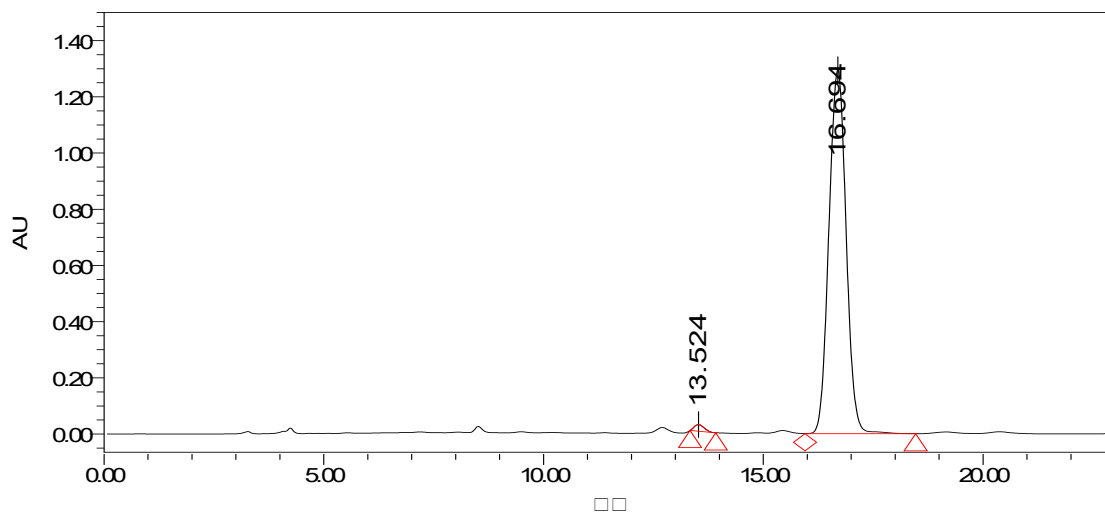

| Peak | Ret Time[min] | Area     | % Area | Height  |
|------|---------------|----------|--------|---------|
| 1    | 13.524        | 370186   | 1.04   | 23499   |
| 2    | 16.694        | 35252532 | 98.96  | 1296359 |

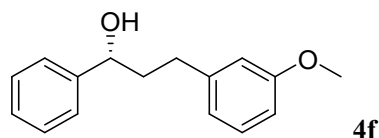

Chiralcel OD-H column, *n*-hexane/isopropanol = 95 : 5 (v/v), 1.0 mL/min, 220 nm, 30 °C

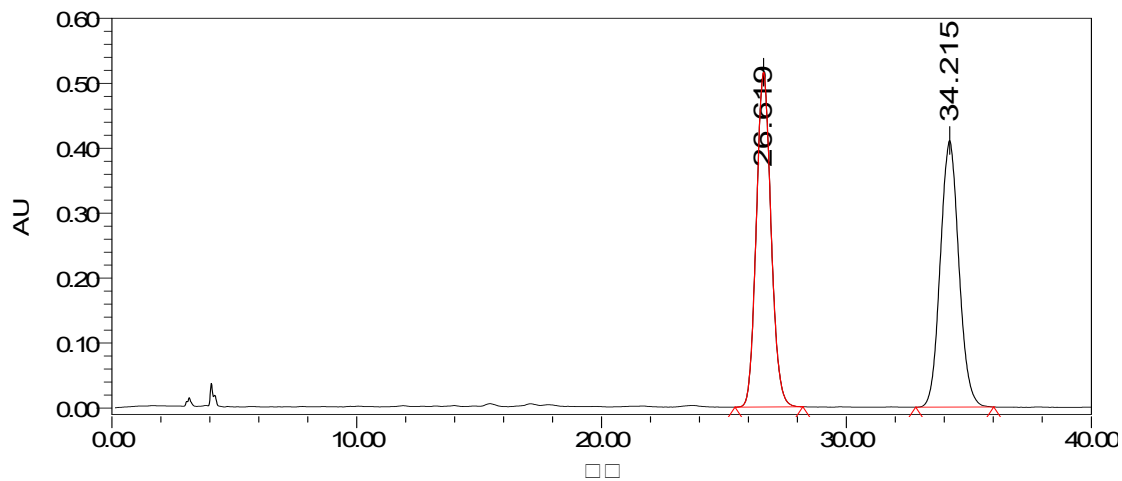

| Peak | Ret Time[min] | Area     | % Area | Height |
|------|---------------|----------|--------|--------|
| 1    | 26.619        | 21574763 | 50.03  | 515653 |
| 2    | 34.215        | 21546738 | 49.97  | 410396 |

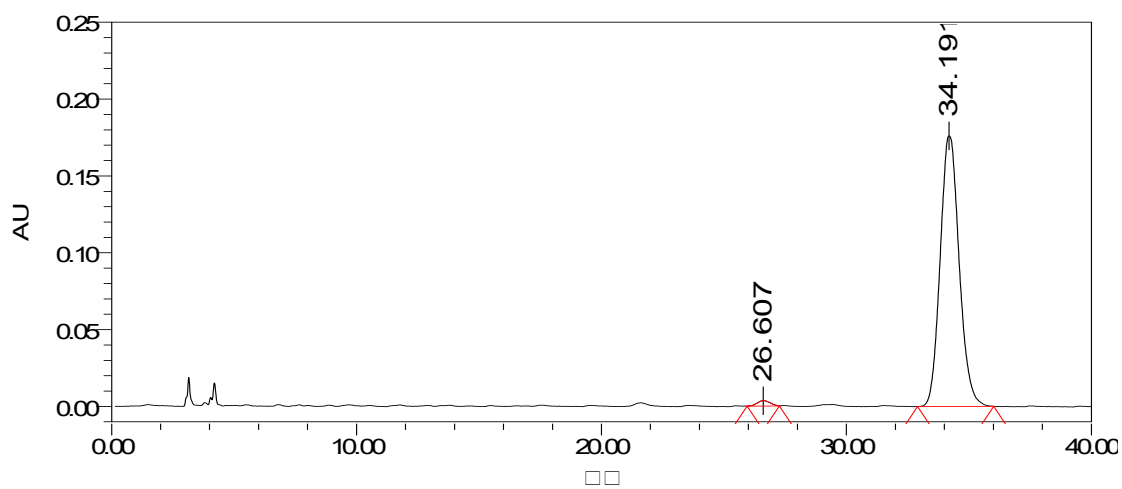

| Peak | Ret Time[min] | Area    | % Area | Height |
|------|---------------|---------|--------|--------|
| 1    | 26.609        | 100734  | 1.05   | 2989   |
| 2    | 34.191        | 9485781 | 98.95  | 176099 |

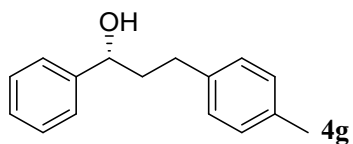

Chiralcel OD-H column, *n*-hexane/isopropanol = 95 : 5 (v/v), 1.0 mL/min, 220 nm, 30 °C

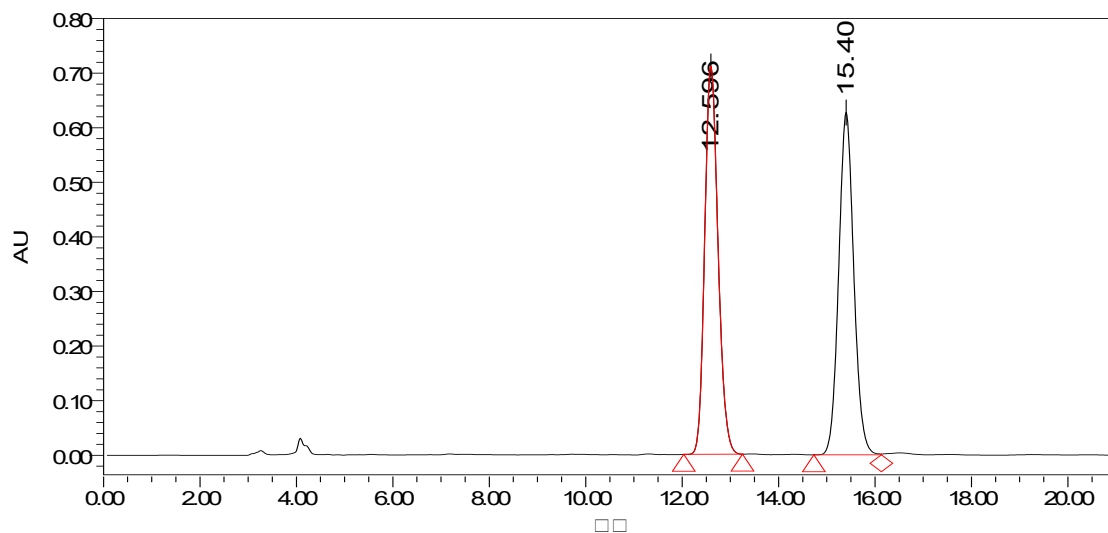

| Peak | Ret Time[min] | Area     | % Area | Height |
|------|---------------|----------|--------|--------|
| 1    | 12.596        | 13677958 | 50.04  | 711241 |
| 2    | 15.401        | 13655448 | 49.96  | 627257 |

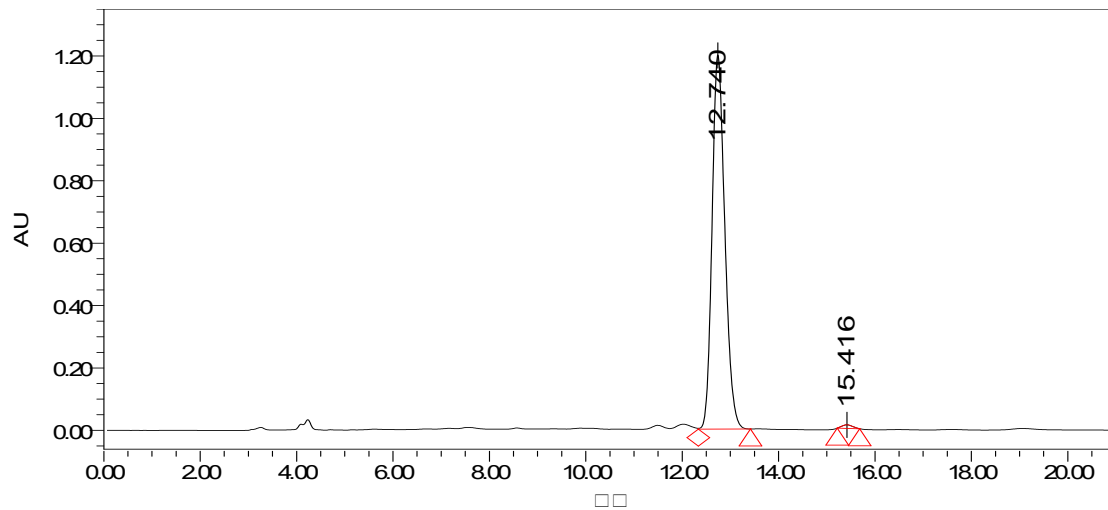

| Peak | Ret Time[min] | Area     | % Area | Height  |
|------|---------------|----------|--------|---------|
| 1    | 12.740        | 22039388 | 99.20  | 1200956 |
| 2    | 15.416        | 177932   | 0.80   | 11491   |

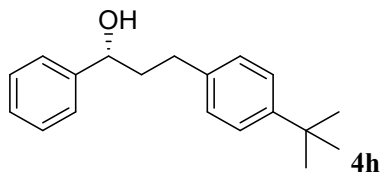

Chiralcel IB-H column, *n*-hexane/isopropanol = 98 : 2 (v/v), 1.0 mL/min, 220 nm, 30 °C

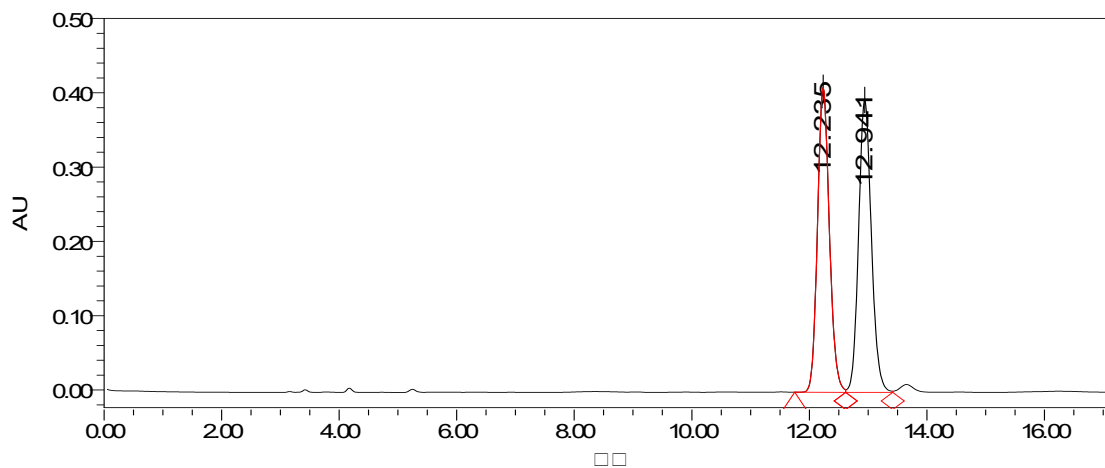

| Peak | Ret Time[min] | Area    | % Area | Height |
|------|---------------|---------|--------|--------|
| 1    | 12.235        | 5764138 | 49.22  | 410200 |
| 2    | 12.941        | 5947595 | 50.78  | 394837 |

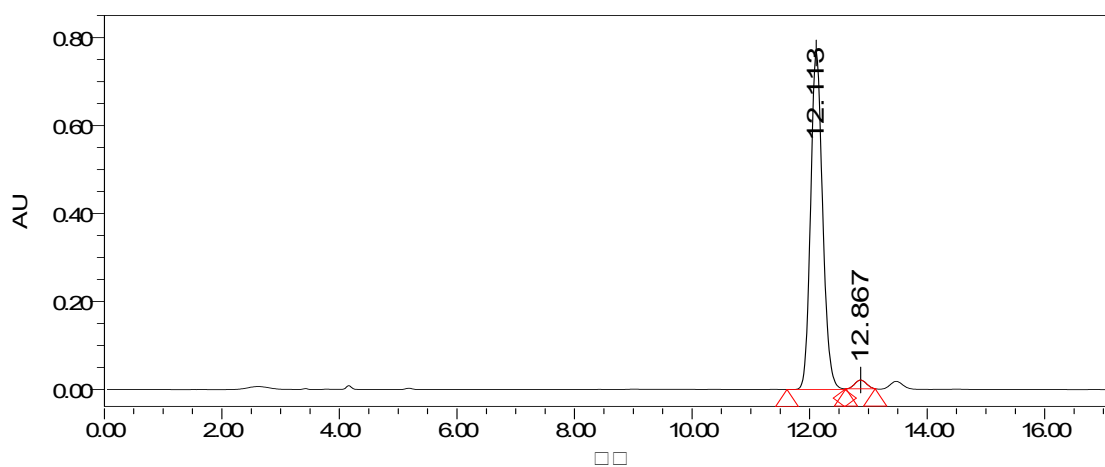

| Peak | Ret Time[min] | Area     | % Area | Height |
|------|---------------|----------|--------|--------|
| 1    | 12.113        | 10919254 | 98.20  | 766892 |
| 2    | 12.867        | 199857   | 1.80   | 16662  |



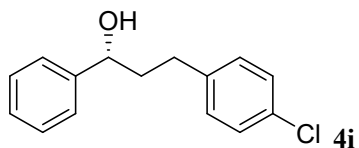

Chiralcel OD-H column, *n*-hexane/isopropanol = 95 : 5 (v/v), 1.0 mL/min, 220 nm, 30 °C

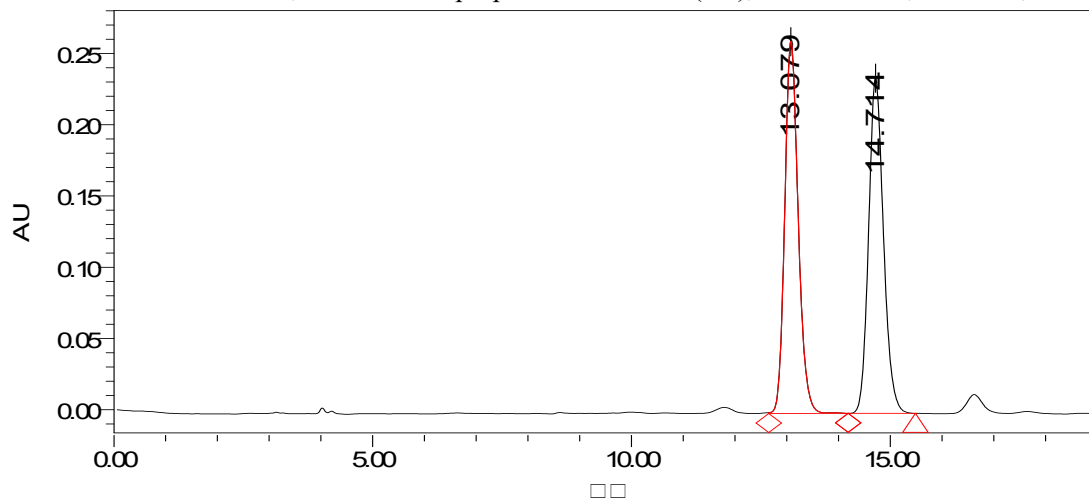

| Peak | Ret Time[min] | Area    | % Area | Height |
|------|---------------|---------|--------|--------|
| 1    | 13.079        | 4734327 | 50.15  | 261352 |
| 2    | 14.714        | 4705559 | 49.85  | 235474 |

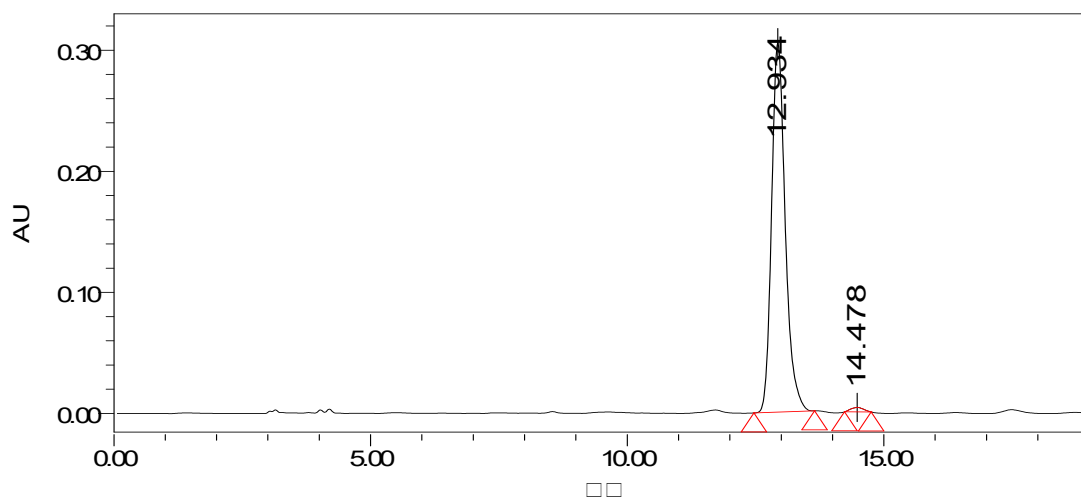

| Peak | Ret Time[min] | Area    | % Area | Height |
|------|---------------|---------|--------|--------|
| 1    | 12.934        | 5643564 | 99.17  | 305287 |
| 2    | 14.478        | 47074   | 0.83   | 2993   |



Chiralcel OJ-H column, *n*-hexane/isopropanol = 95 : 5 (v/v), 1.0 mL/min, 220 nm, 30 °C

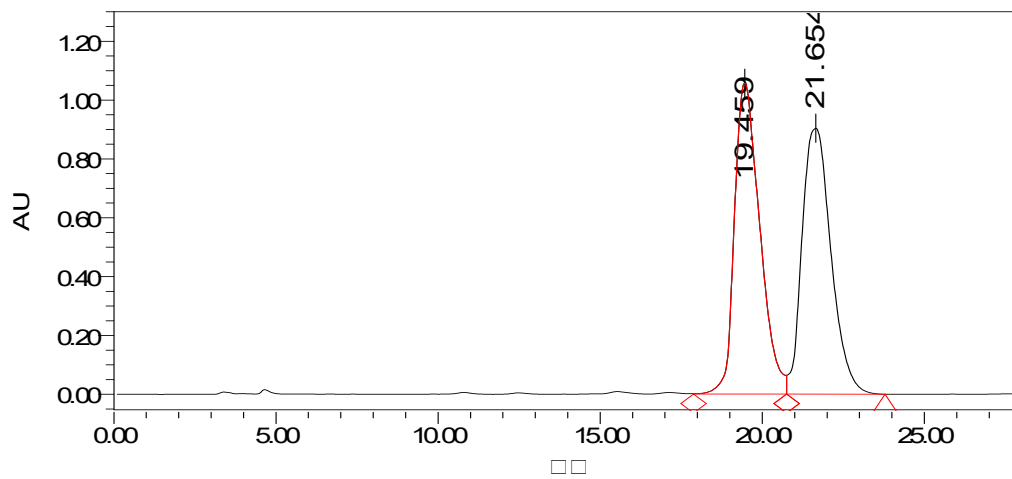

| Peak | Ret Time[min] | Area     | % Area | Height  |
|------|---------------|----------|--------|---------|
| 1    | 19.459        | 56916218 | 50.12  | 1056871 |
| 2    | 21.654        | 56650674 | 49.88  | 903851  |

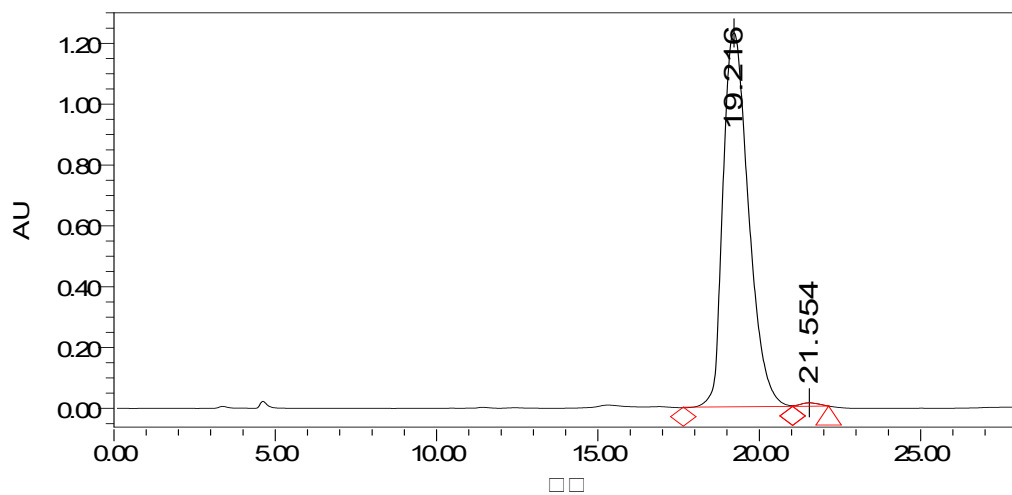

| Peak | Ret Time[min] | Area     | % Area | Height  |
|------|---------------|----------|--------|---------|
| 1    | 19.216        | 67665602 | 99.35  | 1229415 |
| 2    | 21.554        | 440358   | 0.65   | 11108   |



Chiralcel FLM-H column, *n*-hexane/isopropanol = 98 : 2 (v/v), 1.0 mL/min, 220 nm, 30 °C

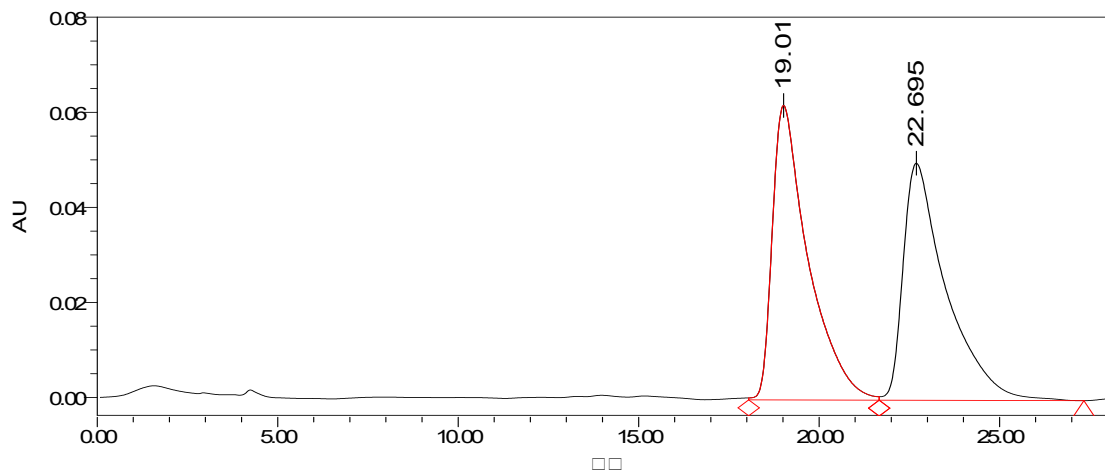

| Peak | Ret Time[min] | Area    | % Area | Height |
|------|---------------|---------|--------|--------|
| 1    | 19.017        | 4290632 | 50.98  | 61964  |
| 2    | 22.695        | 4124951 | 49.02  | 49891  |

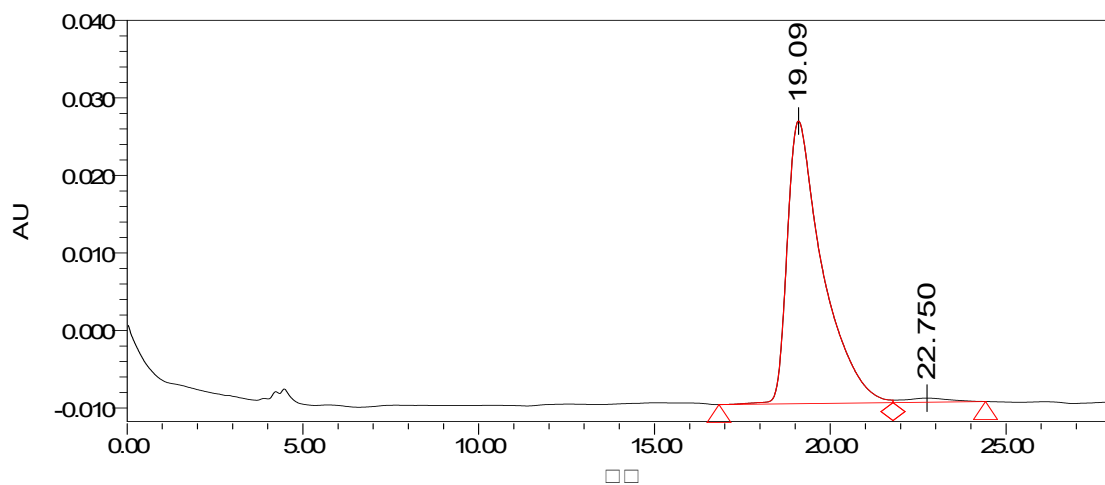

| Peak | Ret Time[min] | Area    | % Area | Height |
|------|---------------|---------|--------|--------|
| 1    | 19.097        | 2550602 | 98.17  | 36474  |
| 2    | 22.750        | 47484   | 1.83   | 536    |

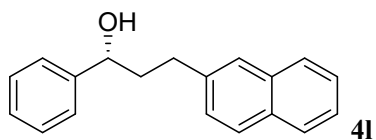

Chiralcel OJ-H column, *n*-hexane/isopropanol = 85 : 15 (v/v), 1.0 mL/min, 220 nm, 30 °C

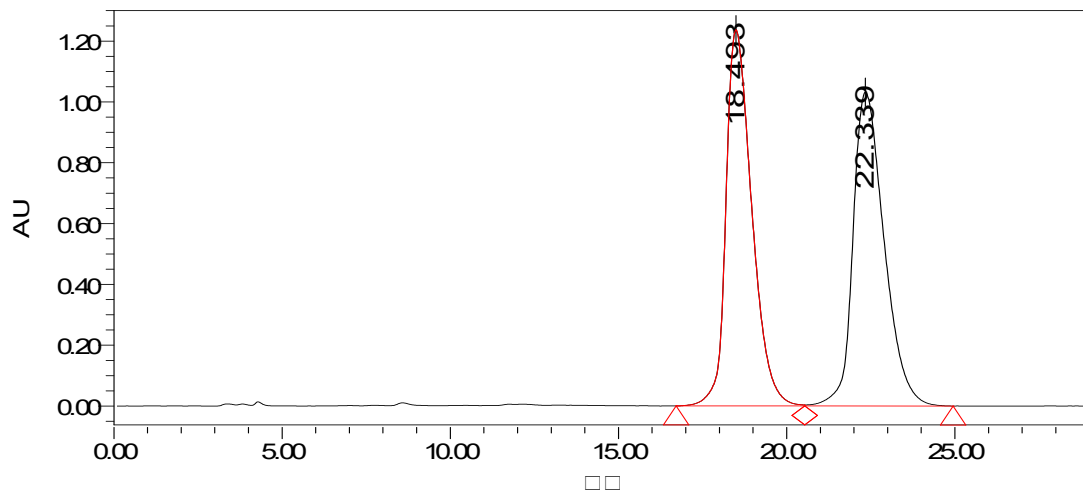

| Peak | Ret Time[min] | Area     | % Area | Height  |
|------|---------------|----------|--------|---------|
| 1    | 18.493        | 66124859 | 49.90  | 1237118 |
| 2    | 22.339        | 66377080 | 50.10  | 1031649 |

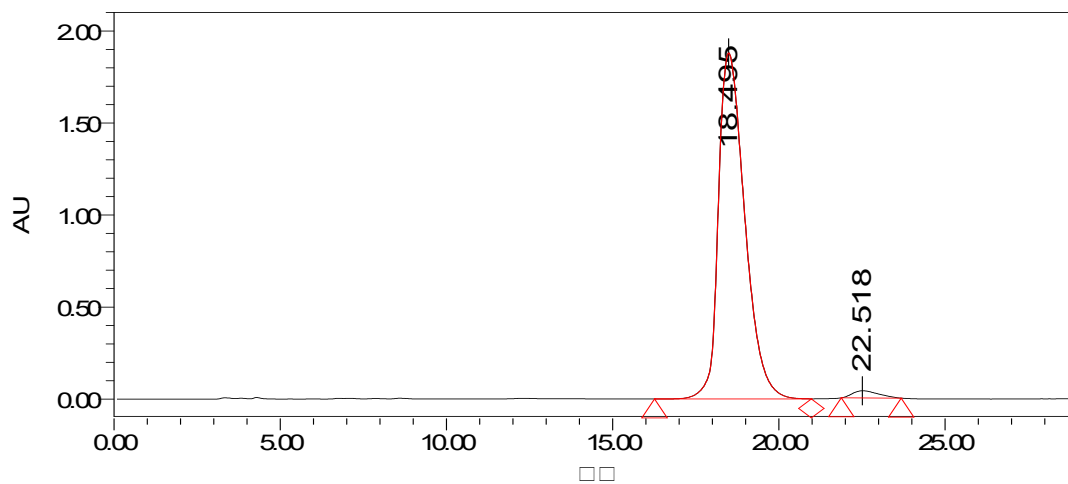

| Peak | Ret Time[min] | Area      | % Area | Height  |
|------|---------------|-----------|--------|---------|
| 1    | 18.495        | 103751321 | 98.00  | 1880633 |
| 2    | 22.518        | 2117634   | 2.00   | 39258   |

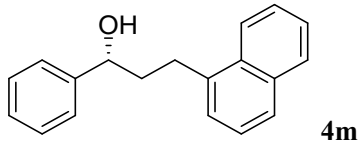

Chiralcel OD-H column, *n*-hexane/isopropanol = 95 : 5 (v/v), 1.0 mL/min, 220 nm, 30 °C

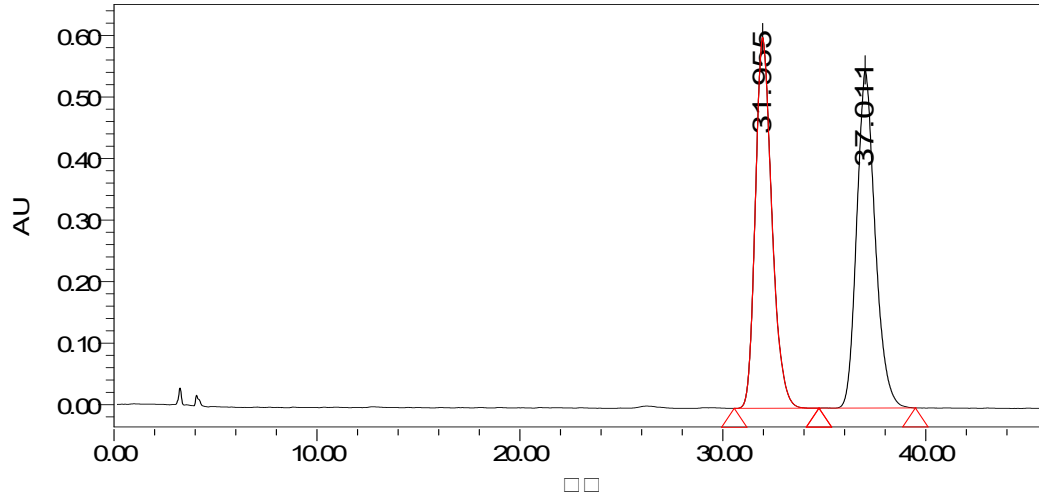

| Peak | Ret Time[min] | Area     | % Area | Height |
|------|---------------|----------|--------|--------|
| 1    | 31.955        | 34107960 | 49.73  | 602771 |
| 2    | 37.011        | 34479410 | 50.27  | 549585 |

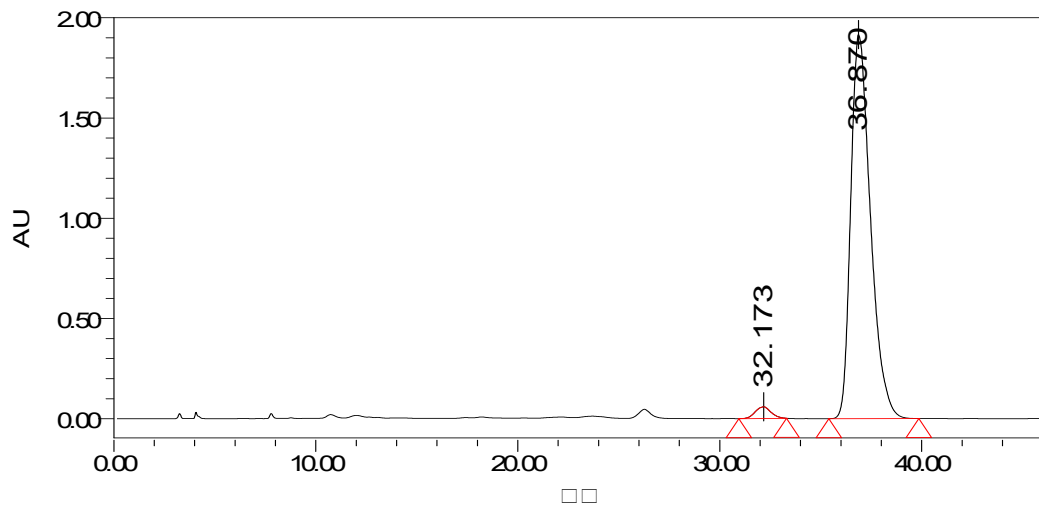

| Peak | Ret Time[min] | Area      | % Area | Height  |
|------|---------------|-----------|--------|---------|
| 1    | 32.173        | 2718747   | 2.05   | 54422   |
| 2    | 36.870        | 130042178 | 97.95  | 1915640 |

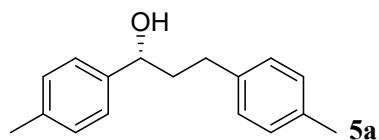

Chiralcel OD-H column, *n*-hexane/isopropanol = 95 : 5 (v/v), 1.0 mL/min, 220 nm, 30 °C

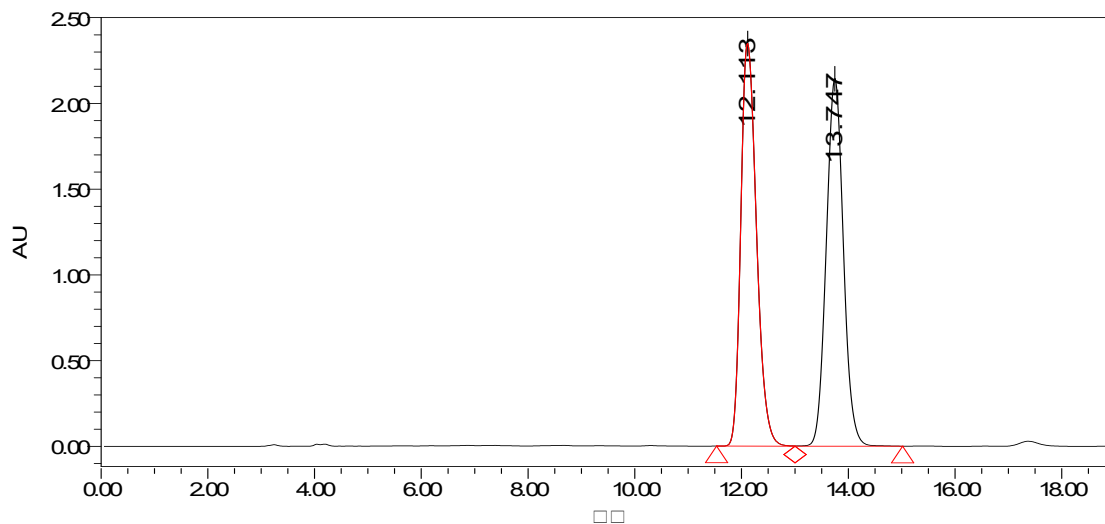

| Peak | Ret Time[min] | Area     | % Area | Height  |
|------|---------------|----------|--------|---------|
| 1    | 12.113        | 48044101 | 50.13  | 2349228 |
| 2    | 13.747        | 47795516 | 49.87  | 2144208 |

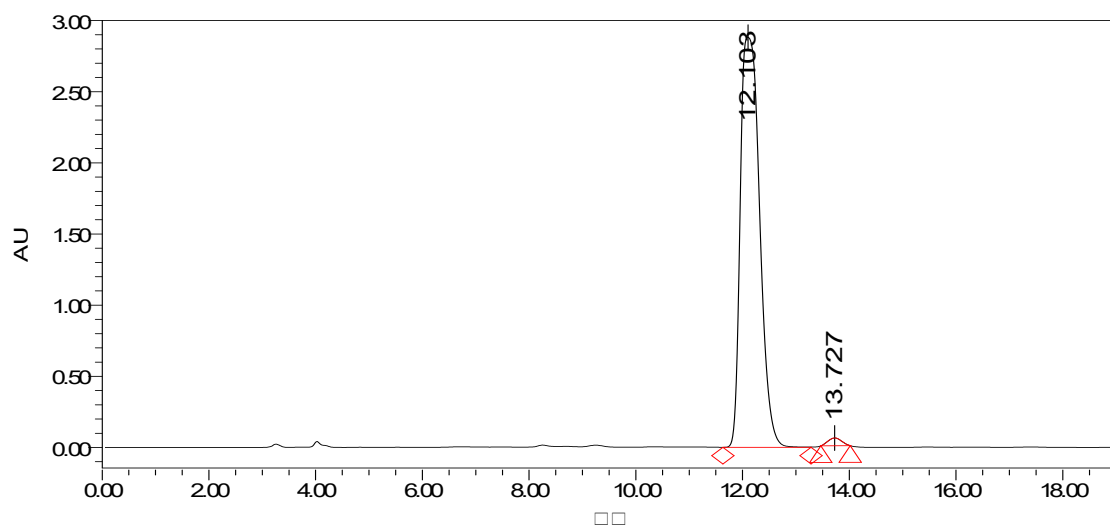

| Peak | Ret Time[min] | Area     | % Area | Height  |
|------|---------------|----------|--------|---------|
| 1    | 12.103        | 72492981 | 98.68  | 2881945 |
| 2    | 13.727        | 970543   | 1.32   | 55216   |

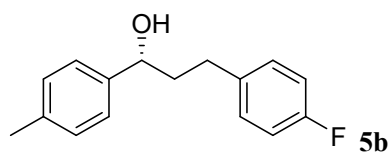

Chiralcel OJ-H column, *n*-hexane/isopropanol = 95 : 5 (v/v), 1.0 mL/min, 220 nm, 30 °C

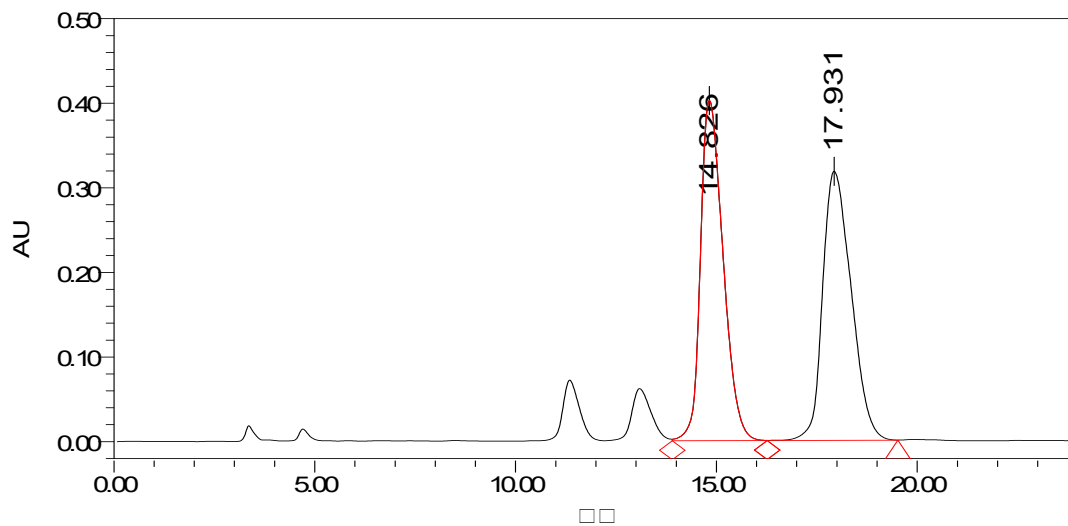

| Peak | Ret Time[min] | Area     | % Area | Height |
|------|---------------|----------|--------|--------|
| 1    | 14.826        | 15708003 | 50.02  | 402202 |
| 2    | 17.931        | 15694642 | 49.98  | 318097 |

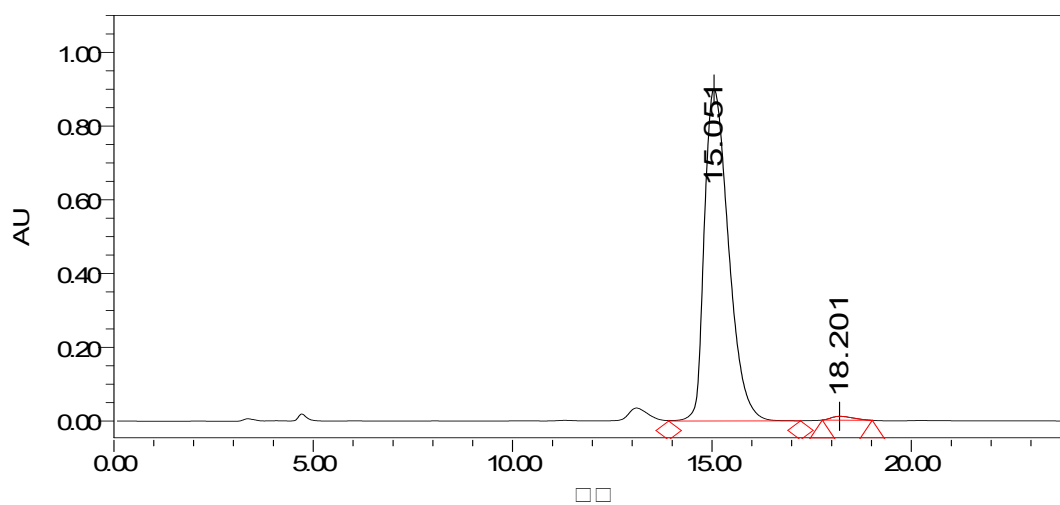

| Peak | Ret Time[min] | Area     | % Area | Height |
|------|---------------|----------|--------|--------|
| 1    | 15.051        | 37841196 | 98.99  | 900052 |
| 2    | 18.201        | 386419   | 1.01   | 10420  |

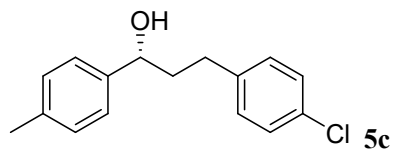

Chiralcel OD-H column, *n*-hexane/isopropanol = 97 : 3 (v/v), 1.0 mL/min, 220 nm, 30 °C

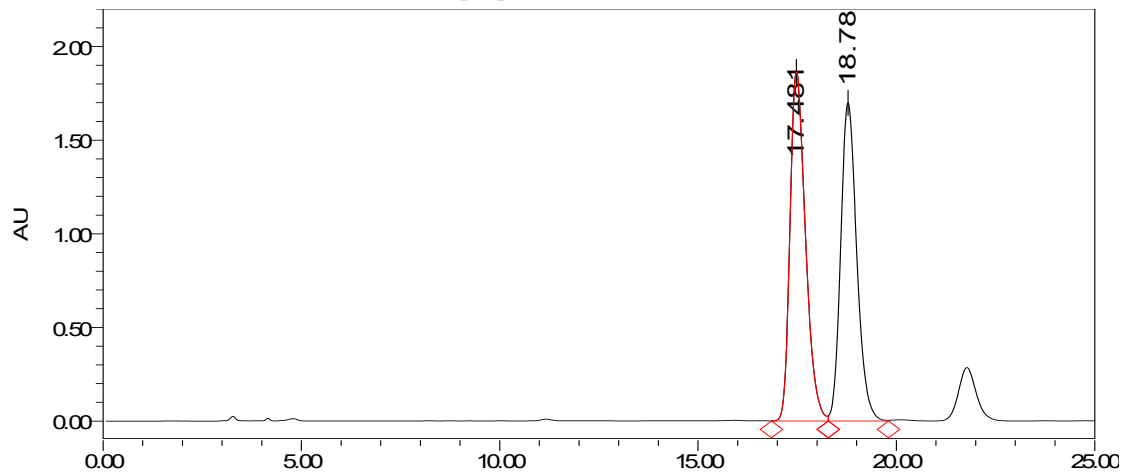

| Peak | Ret Time[min] | Area     | % Area | Height  |
|------|---------------|----------|--------|---------|
| 1    | 17.481        | 49412086 | 50.09  | 1866264 |
| 2    | 18.782        | 49235413 | 49.91  | 1699877 |

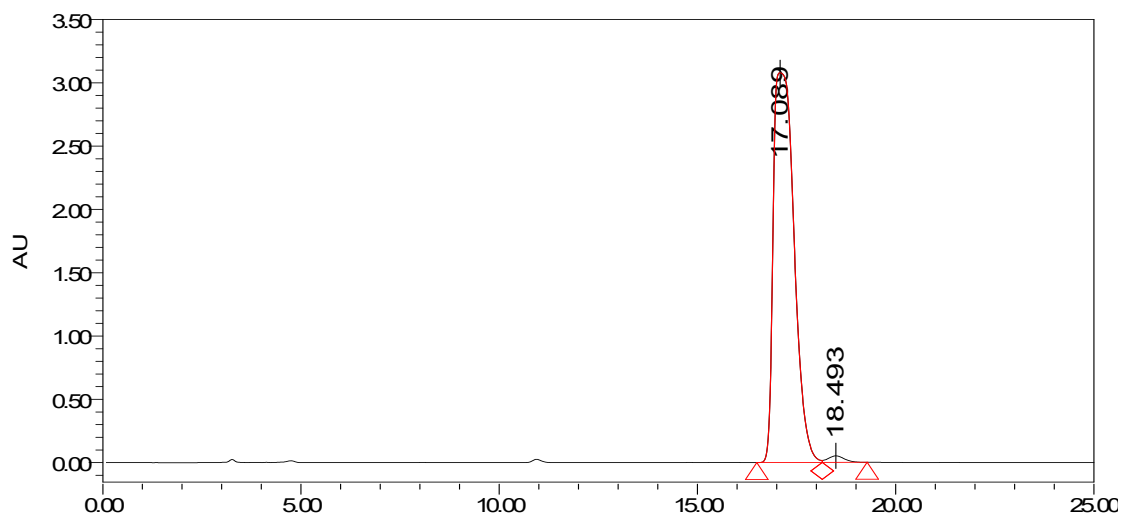

| Peak | Ret Time[min] | Area      | % Area | Height  |
|------|---------------|-----------|--------|---------|
| 1    | 17.089        | 112375328 | 98.85  | 3078089 |
| 2    | 18.493        | 1307109   | 1.15   | 51434   |



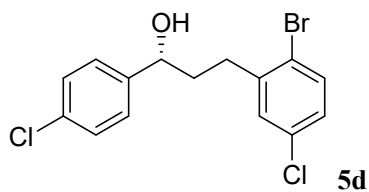

Chiralcel OD-H column, n-hexane/isopropanol = 95 : 5 (v/v), 1.0 mL/min, 220 nm, 30 °C

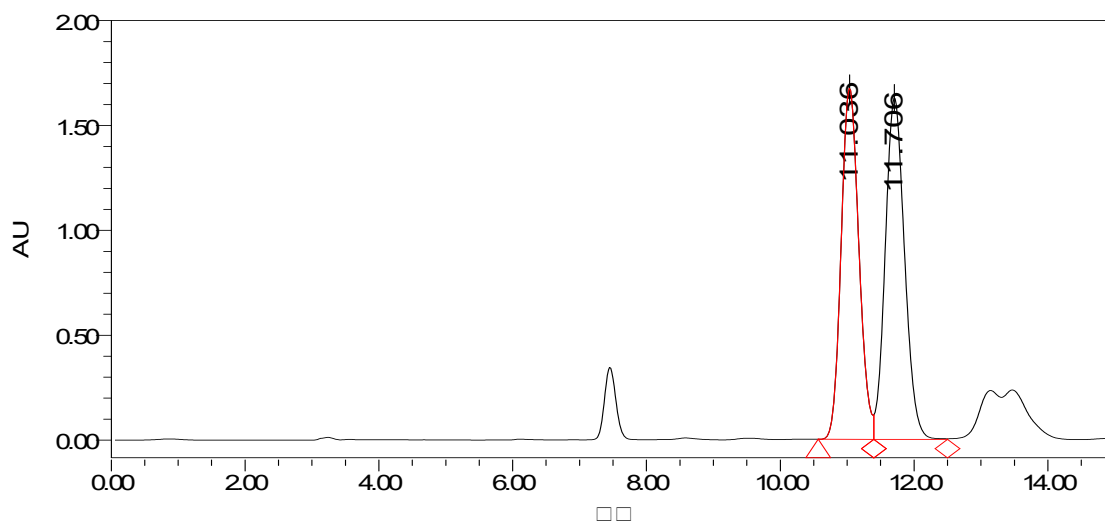

| Peak | Ret Time[min] | Area     | % Area | Height  |
|------|---------------|----------|--------|---------|
| 1    | 11.036        | 31509684 | 49.77  | 1672826 |
| 2    | 11.706        | 31804260 | 50.23  | 1627204 |

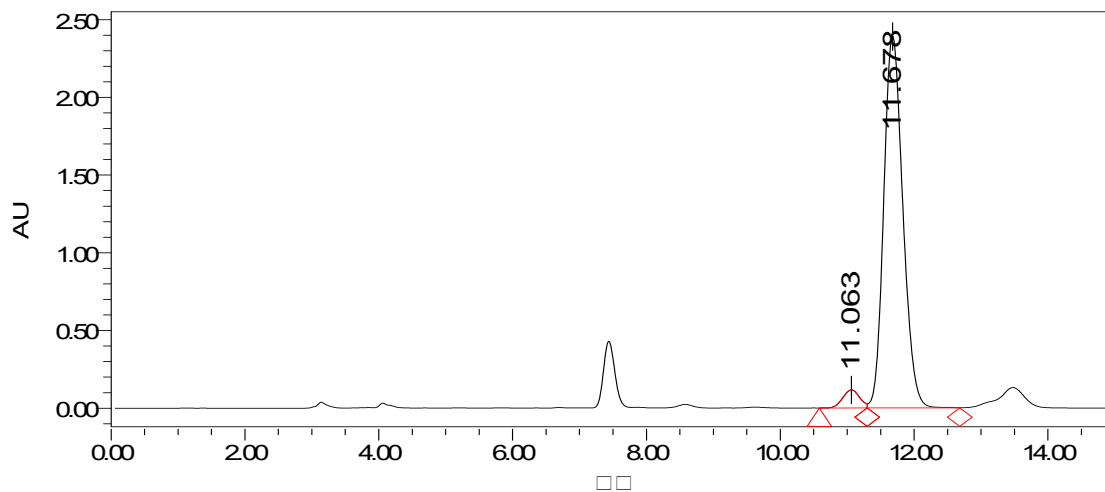

| Peak | Ret Time[min] | Area     | % Area | Height  |
|------|---------------|----------|--------|---------|
| 1    | 11.063        | 1746154  | 3.52   | 116685  |
| 2    | 11.678        | 47892715 | 96.48  | 2393764 |

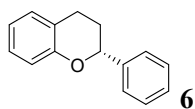

Chiralcel IA-H column, n-hexane, 0.4 mL/min, 220 nm, 30 °C

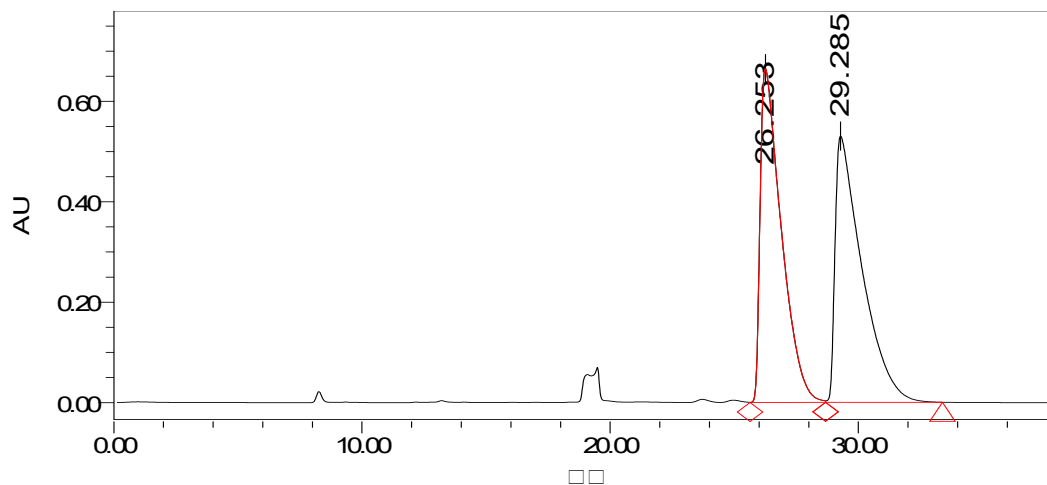

| Peak | Ret Time[min] | Area     | % Area | Height |
|------|---------------|----------|--------|--------|
| 1    | 26.253        | 39247620 | 49.61  | 665171 |
| 2    | 29.285        | 39872483 | 50.39  | 530588 |

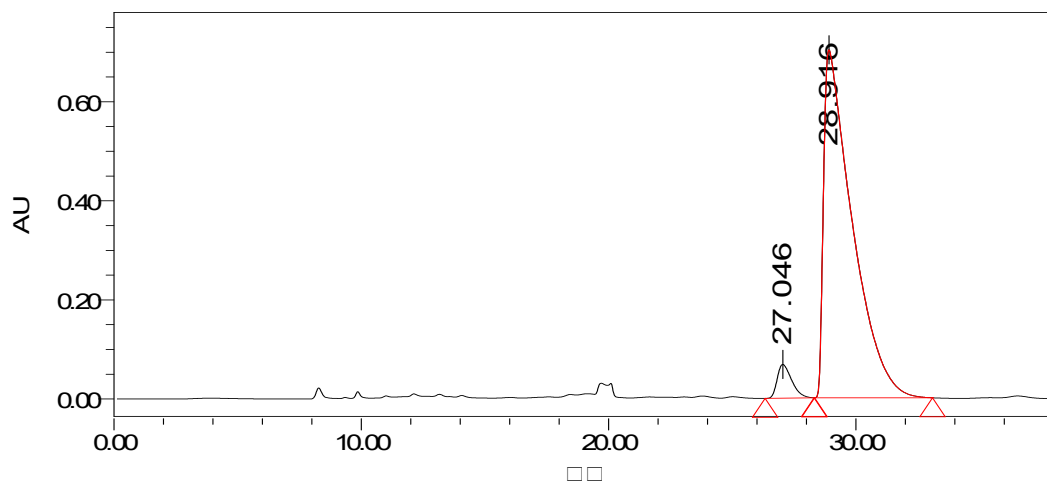

| Peak | Ret Time[min] | Area     | % Area | Height |
|------|---------------|----------|--------|--------|
| 1    | 27.046        | 2098016  | 3.58   | 58377  |
| 2    | 28.916        | 56483433 | 96.42  | 702367 |

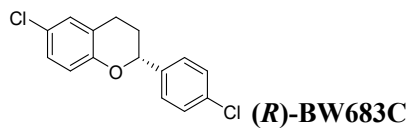

Chiralcel IA-H column, n-hexane/isopropanol = 99 : 1 (v/v), 1.0 mL/min, 220 nm, 30 °C

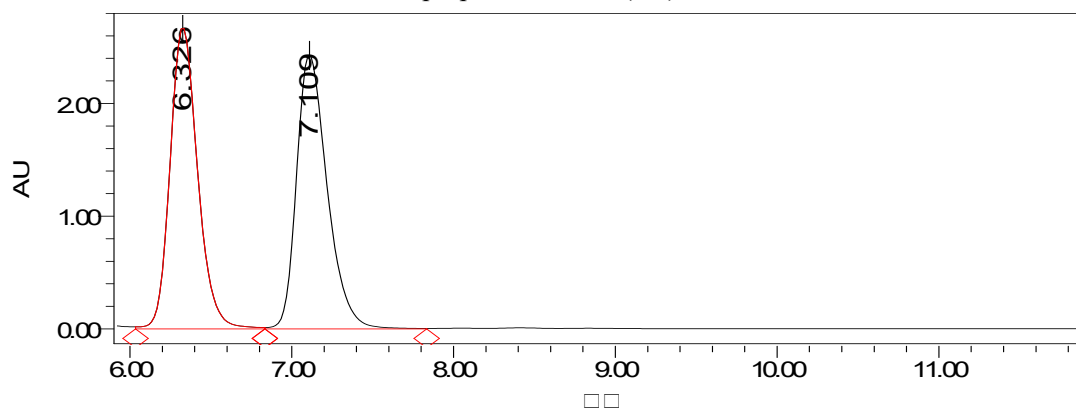

| Peak | Ret Time[min] | Area     | % Area | Height  |
|------|---------------|----------|--------|---------|
| 1    | 6.326         | 31673110 | 49.75  | 2674662 |
| 2    | 7.109         | 31989169 | 50.25  | 2439120 |

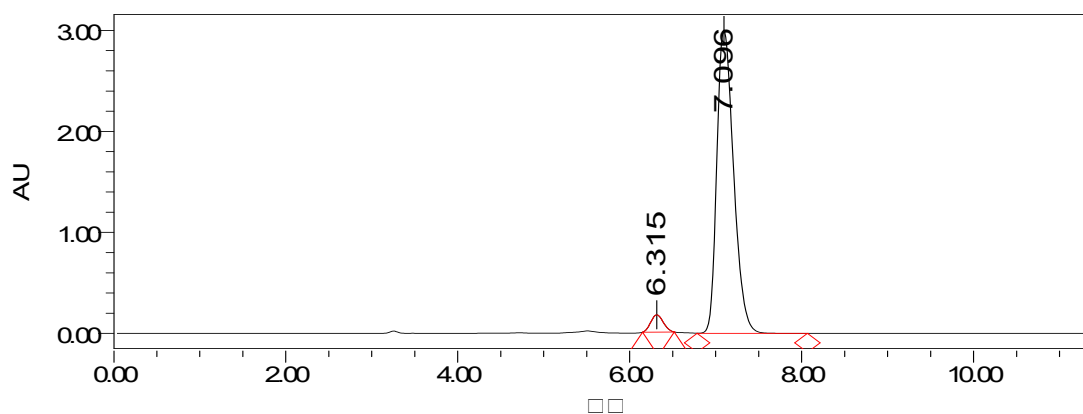

| Peak | Ret Time[min] | Area     | % Area | Height  |
|------|---------------|----------|--------|---------|
| 1    | 6.315         | 1734234  | 4.08   | 171711  |
| 2    | 7.096         | 40817158 | 95.92  | 3009615 |
